# Supplementary material for: Mechanism of the rhodium(iii)-catalyzed alkenylation reaction of N-phenoxyacetamide with styrene or N-tosylhydrazone: a computational study
Source: Royal Society of Chemistry journal article supplement (doi:10.1039/c6dt00093b), 2016-01-01
Supplement: c6dt00093b1.pdf [file c6dt00093b1.pdf]

## *Supporting Information*

### **Mechanism of rhodium(III)-catalyzed alkenylation of *N*-phenoxyacetamide using *N*-tosylhydrazone or alkenes: a computational study<sup>†</sup>**

Zhiping Qiu,<sup>‡a</sup> Jiaojiao Deng,<sup>‡a</sup> Zhongchao Zhang,<sup>a</sup> Caihong Wu,<sup>a</sup> Juan Li<sup>\*a</sup> and  
Xiaojian Liao<sup>\*a</sup>

Department of Chemistry, Jinan University, Huangpu Road West 601, Guangzhou,  
Guangdong 510632, P. R. China

\*Corresponding author. Email: [tchjli@jnu.edu.cn](mailto:tchjli@jnu.edu.cn) (J. Li)

#### **Table of Contents**

|                                                                                |           |
|--------------------------------------------------------------------------------|-----------|
| <b>Complete Reference for Ref (21)</b> .....                                   | <b>S2</b> |
| <b>Table S1</b> .....                                                          | <b>S3</b> |
| <b>Scheme S1</b> .....                                                         | <b>S4</b> |
| <b>Scheme S2</b> .....                                                         | <b>S5</b> |
| <b>Calculated imaginary frequencies of all transition states species</b> ..... | <b>S6</b> |
| <b>Cartesian coordinates and electronic energies</b> .....                     | <b>S7</b> |

---

<sup>a</sup> Department of Chemistry, Jinan University, Huangpu Road West 601, Guangzhou, Guangdong 510632, P. R. China

E-mail: [tchjli@jnu.edu.cn](mailto:tchjli@jnu.edu.cn)

<sup>†</sup> Electronic supplementary information (ESI) available: Complete ref. 21, calculated imaginary frequencies of all of the transition states, and tables of Cartesian coordinates and electronic energies for all of the calculated structures.

<sup>‡</sup> These authors contributed equally.

**Complete Reference for Ref (21):**

M. J. Frisch, G. W. Trucks, H. B. Schlegel, G. E. Scuseria, M. A. Robb, J. R. Cheeseman, G. Scalmani, V. Barone, B. Mennucci, G. A. Petersson, H. Nakatsuji, M. Caricato, X. Li, H. P. Hratchian, A. F. Izmaylov, J. Bloino, G. Zheng, J. L. Sonnenberg, M. Hada, M. Ehara, K. Toyota, R. Fukuda, J. Hasegawa, M. Ishida, T. Nakajima, Y. Honda, O. Kitao, H. Nakai, T. Vreven, Jr., J. A. Montgomery, J. E. Peralta, F. Ogliaro, M. Bearpark, J. J. Heyd, E. Brothers, K. N. Kudin, V. N. Staroverov, T. Keith, R. Kobayashi, J. Normand, K. Raghavachari, A. Rendell, J. C. Burant, S. S. Iyengar, J. Tomasi, M. Cossi, N. Rega, J. M. Millam, M. Klene, J. E. Knox, J. B. Cross, V. Bakken, C. Adamo, J. Jaramillo, R. Gomperts, R. E. Stratmann, O. Yazyev, A. J. Austin, R. Cammi, C. Pomelli, J. W. Ochterski, R. L. Martin, K. Morokuma, V. G. Zakrzewski, G. A. Voth, P. Salvador, J. J. Dannenberg, S. Dapprich, A. D. Daniels, O. Farkas, J. B. Foresman, J. V. Ortiz, J. Cioslowski, and D. J. Fox, *Gaussian 09, Revision C.01*, Gaussian, Inc., Wallingford, CT, 2010.

**Table S1.** Relevant critical structures with free energies (in parentheses, kcal/mol) relative to isolated catalyst and substrate with DZVP basis set to treat the rhodium center.

|                              | <b>TS<sub>F-G</sub></b> | <b>TS<sub>F-L</sub></b> | <b>TS<sub>G-H</sub></b> | <b>TS<sub>G-J</sub></b> | <b>TS<sub>O-L</sub></b> | <b>TS<sub>P-Q</sub></b> | <b>TS<sub>M-J</sub></b> |
|------------------------------|-------------------------|-------------------------|-------------------------|-------------------------|-------------------------|-------------------------|-------------------------|
| <b><math>\Delta G</math></b> | <b>-15.7</b>            | <b>-4.1</b>             | <b>-27.6</b>            | <b>-17.4</b>            | <b>-2.3</b>             | <b>3.5</b>              | <b>10.7</b>             |

## Other possible insertion of C2

### Scheme S1

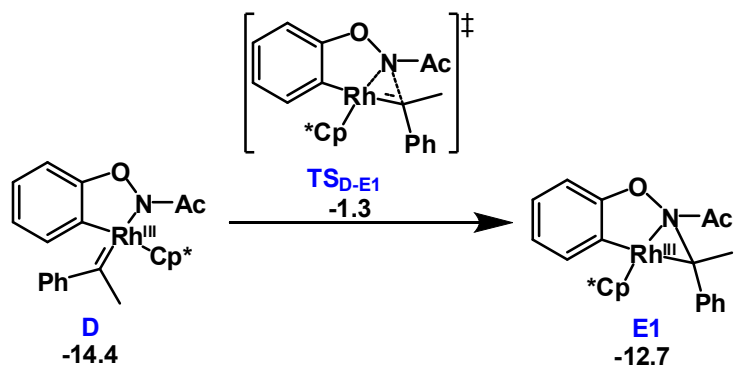

## Other possible insertion of C1'

### Scheme S2

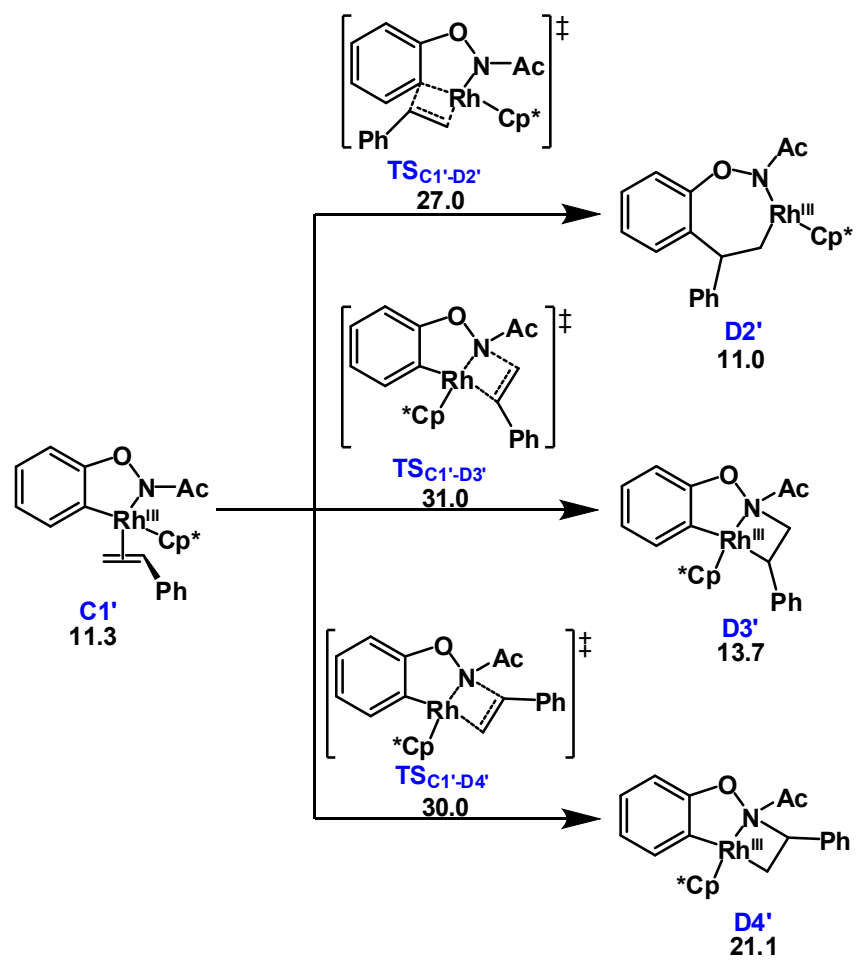

## Calculated imaginary frequencies of all transition states species

---

|                             |          |
|-----------------------------|----------|
| <b>TS<sub>A1-B</sub></b>    | -1133.92 |
| <b>TS<sub>B1-C</sub></b>    | -1516.78 |
| <b>TS<sub>C2-D</sub></b>    | -398.31  |
| <b>TS<sub>D-E</sub></b>     | -216.44  |
| <b>TS<sub>E-F</sub></b>     | -216.94  |
| <b>TS<sub>F-G</sub></b>     | -115.55  |
| <b>TS<sub>G-H</sub></b>     | -1056.47 |
| <b>TS<sub>H1-I</sub></b>    | -463.75  |
| <b>TS<sub>I1-A</sub></b>    | -305.72  |
| <b>TS<sub>G-J</sub></b>     | -1869.73 |
| <b>TS<sub>F-L</sub></b>     | -1227.98 |
| <b>TS<sub>E-M</sub></b>     | -662.74  |
| <b>TS<sub>M-N</sub></b>     | -1029.44 |
| <b>TS<sub>N-O</sub></b>     | -135.94  |
| <b>TS<sub>O-L</sub></b>     | -620.01  |
| <b>TS<sub>P-Q</sub></b>     | -485.58  |
| <b>TS<sub>M-J</sub></b>     | -1111.58 |
| <b>TS<sub>C1'-D'</sub></b>  | -274.48  |
| <b>TS<sub>D'-D1'</sub></b>  | -577.50  |
| <b>TS<sub>D1'-E'</sub></b>  | -1204.46 |
| <b>TS<sub>E'-F'</sub></b>   | -133.78  |
| <b>TS<sub>F'-G'</sub></b>   | -513.74  |
| <b>TS<sub>G1'-H'</sub></b>  | -386.08  |
| <b>TS<sub>I'-J'</sub></b>   | -570.16  |
| <b>TS<sub>D'-K'</sub></b>   | -259.15  |
| <b>TS<sub>D1'-J</sub></b>   | -1069.66 |
| <b>TS<sub>L'-M'</sub></b>   | -261.94  |
| <b>TS<sub>M'-K</sub></b>    | -1351.19 |
| <b>TS<sub>D-E1</sub></b>    | -252.55  |
| <b>TS<sub>C1'-D2'</sub></b> | -277.06  |
| <b>TS<sub>C1'-D3'</sub></b> | -387.58  |
| <b>TS<sub>C1'-D4'</sub></b> | -357.36  |

---

## Cartesian coordinates and electronic energies

AcOH

E = -228.9540758au

|   |           |           |           |
|---|-----------|-----------|-----------|
| C | -0.092877 | 0.124748  | 0.000216  |
| O | -0.654537 | 1.191915  | -0.000088 |
| O | -0.761099 | -1.047705 | -0.000081 |
| H | -1.706331 | -0.814984 | -0.000249 |
| C | 1.387410  | -0.098141 | 0.000045  |
| H | 1.679614  | -0.680655 | 0.881357  |
| H | 1.679421  | -0.680812 | -0.881229 |
| H | 1.905180  | 0.863130  | -0.000098 |

**1**

E = -515.0685846au

|   |           |           |           |
|---|-----------|-----------|-----------|
| C | -3.233996 | 0.542852  | 0.303967  |
| C | -2.974603 | -0.819119 | 0.164415  |
| C | -1.697797 | -1.263537 | -0.149205 |
| C | -0.677082 | -0.332785 | -0.323787 |
| C | -0.913159 | 1.028813  | -0.188544 |
| C | -2.201616 | 1.456007  | 0.125528  |
| H | -4.236158 | 0.887827  | 0.549969  |
| H | -3.773336 | -1.546245 | 0.300848  |
| H | -1.470448 | -2.321591 | -0.263900 |
| H | -0.102714 | 1.738077  | -0.332908 |
| H | -2.392768 | 2.522706  | 0.231605  |
| O | 0.557536  | -0.882487 | -0.619966 |
| N | 1.556549  | 0.056788  | -0.844169 |
| H | 1.853046  | 0.043655  | -1.817371 |
| C | 2.597038  | 0.111077  | 0.080395  |
| C | 2.258451  | -0.362174 | 1.463425  |
| H | 1.353730  | 0.129983  | 1.842023  |
| H | 2.061450  | -1.440769 | 1.462613  |
| H | 3.104071  | -0.141362 | 2.118708  |
| O | 3.662946  | 0.577911  | -0.259980 |

**NH<sub>2</sub>Ac**

E = -209.0789775au

|   |           |           |           |
|---|-----------|-----------|-----------|
| N | 1.019715  | -0.837365 | -0.009753 |
| C | 0.075335  | 0.150167  | -0.008557 |
| C | -1.355892 | -0.333988 | -0.000656 |
| H | -1.471335 | -1.378522 | -0.312674 |
| H | -1.763560 | -0.226920 | 1.011936  |
| H | -1.947500 | 0.308983  | -0.659083 |
| O | 0.368403  | 1.330172  | 0.002012  |
| H | 1.990871  | -0.562121 | 0.041707  |
| H | 0.789627  | -1.818313 | 0.025568  |

**A**

E = -956.0633907au

|    |           |           |           |
|----|-----------|-----------|-----------|
| Rh | -0.061807 | 0.181558  | -0.120131 |
| C  | 2.432309  | -1.299498 | -0.040746 |
| O  | 2.040816  | -1.790491 | 1.016170  |
| O  | 1.757163  | -0.515606 | -0.822976 |
| C  | 3.830979  | -1.569481 | -0.558379 |
| H  | 3.806524  | -1.840564 | -1.619822 |
| H  | 4.428002  | -0.652925 | -0.474682 |
| H  | 4.306657  | -2.362755 | 0.025300  |
| C  | 1.306872  | 2.311671  | 0.023488  |
| O  | 0.631977  | 2.059669  | -1.019381 |
| O  | 1.191817  | 1.562038  | 1.037880  |
| C  | 2.264637  | 3.461764  | 0.039632  |
| H  | 2.385686  | 3.850321  | 1.055274  |
| H  | 3.242491  | 3.105765  | -0.308201 |
| H  | 1.929842  | 4.251919  | -0.639150 |
| C  | -1.674017 | -0.820164 | -1.075336 |
| C  | -1.157800 | -1.685249 | -0.050208 |
| C  | -1.268318 | -1.001542 | 1.202337  |
| C  | -2.177313 | 0.381061  | -0.431628 |
| C  | -1.919549 | 0.276132  | 0.964969  |
| C  | -0.568772 | -3.034775 | -0.250328 |
| H  | 0.216326  | -3.223478 | 0.488409  |
| H  | -1.347434 | -3.806001 | -0.159043 |
| H  | -0.115723 | -3.128387 | -1.244451 |
| C  | -0.776996 | -1.511165 | 2.509375  |
| H  | -1.319386 | -2.421543 | 2.801828  |
| H  | 0.292265  | -1.749771 | 2.425143  |
| H  | -0.905757 | -0.767895 | 3.303712  |
| C  | -2.190733 | 1.296426  | 2.013312  |
| H  | -3.047826 | 1.005359  | 2.636899  |
| H  | -1.319494 | 1.418920  | 2.668539  |
| H  | -2.409691 | 2.275670  | 1.573416  |
| C  | -2.760121 | 1.543733  | -1.152319 |
| H  | -3.779267 | 1.319414  | -1.497632 |
| H  | -2.804064 | 2.432712  | -0.513931 |
| H  | -2.153060 | 1.803455  | -2.028687 |
| C  | -1.733714 | -1.117903 | -2.531257 |
| H  | -2.651539 | -1.666888 | -2.788161 |
| H  | -1.715178 | -0.197385 | -3.126454 |
| H  | -0.877043 | -1.726981 | -2.843411 |

## Diazo

E = -418.7943383au

|   |           |           |           |
|---|-----------|-----------|-----------|
| C | 1.380311  | 0.376221  | 0.000027  |
| C | -0.059251 | 0.133305  | -0.000100 |
| C | -0.946684 | 1.218745  | -0.000140 |
| C | -0.594712 | -1.164382 | 0.000082  |
| C | -2.320722 | 1.009217  | -0.000080 |
| H | -0.560642 | 2.237004  | -0.000178 |
| C | -1.966210 | -1.364828 | 0.000079  |
| H | 0.072419  | -2.026480 | 0.000200  |
| C | -2.840789 | -0.280084 | 0.000022  |
| H | -2.989854 | 1.868523  | -0.000049 |
| H | -2.357393 | -2.381091 | 0.000209  |
| H | -3.917290 | -0.439789 | 0.000084  |
| C | 2.003973  | 1.739176  | 0.000152  |
| H | 3.096598  | 1.665705  | 0.000387  |
| H | 1.707519  | 2.315838  | -0.887685 |
| H | 1.707133  | 2.315883  | 0.887867  |
| N | 2.179138  | -0.650934 | -0.000030 |
| N | 2.864578  | -1.571896 | -0.000126 |

## Nitrogen

E = -109.4550063au

|   |          |          |           |
|---|----------|----------|-----------|
| N | 0.000000 | 0.000000 | 0.552560  |
| N | 0.000000 | 0.000000 | -0.552560 |

## Al

E = -1471.1511841au

|    |           |           |           |
|----|-----------|-----------|-----------|
| Rh | -1.007905 | -0.023258 | -0.097658 |
| C  | -0.026122 | -1.339478 | 2.474567  |
| O  | -1.045431 | -1.057392 | 1.755872  |
| O  | 1.122669  | -0.879214 | 2.331566  |
| C  | -0.289091 | -2.351924 | 3.562972  |
| H  | -0.402830 | -3.339548 | 3.098049  |
| H  | 0.542596  | -2.381294 | 4.272245  |
| H  | -1.226215 | -2.125386 | 4.082295  |
| C  | 0.499733  | -2.515380 | -0.697596 |
| O  | 0.580387  | -1.220253 | -0.700321 |
| O  | -0.529134 | -3.184289 | -0.646444 |
| C  | 1.874788  | -3.148668 | -0.753253 |
| H  | 2.403183  | -2.914439 | 0.180593  |
| H  | 1.802259  | -4.232908 | -0.878695 |
| H  | 2.465418  | -2.707593 | -1.565359 |
| C  | -2.205525 | -0.288701 | -1.863774 |

|   |           |           |           |
|---|-----------|-----------|-----------|
| C | -2.966168 | -0.594709 | -0.680383 |
| C | -3.065181 | 0.618143  | 0.110236  |
| C | -1.763756 | 1.073673  | -1.772133 |
| C | -2.340112 | 1.640531  | -0.562703 |
| C | 5.491496  | -0.329394 | -0.563473 |
| C | 4.834436  | 0.057116  | -1.730194 |
| C | 3.555375  | 0.590551  | -1.669975 |
| C | 2.935789  | 0.747360  | -0.432240 |
| C | 3.575482  | 0.373994  | 0.743804  |
| C | 4.855543  | -0.170976 | 0.661656  |
| H | 6.490841  | -0.757023 | -0.612483 |
| H | 5.316457  | -0.068304 | -2.698503 |
| H | 3.012192  | 0.883013  | -2.566774 |
| H | 3.089414  | 0.464297  | 1.712208  |
| H | 5.355823  | -0.474247 | 1.579715  |
| O | 1.686666  | 1.330375  | -0.491882 |
| N | 0.847094  | 1.101125  | 0.605014  |
| C | 0.625869  | 2.256240  | 1.396418  |
| C | 1.327768  | 3.511617  | 0.971536  |
| H | 2.416085  | 3.370897  | 0.977767  |
| H | 1.054688  | 3.784552  | -0.055374 |
| H | 1.047664  | 4.312315  | 1.660731  |
| O | -0.137186 | 2.179700  | 2.333717  |
| H | 1.099132  | 0.240090  | 1.205156  |
| C | -3.728877 | 0.717877  | 1.436970  |
| H | -3.315854 | -0.038274 | 2.118476  |
| H | -3.566389 | 1.699838  | 1.894411  |
| H | -4.811656 | 0.552057  | 1.351174  |
| C | -2.186858 | 3.043883  | -0.090097 |
| H | -3.136249 | 3.586974  | -0.198078 |
| H | -1.892422 | 3.086819  | 0.967106  |
| H | -1.433200 | 3.584044  | -0.675240 |
| C | -0.889206 | 1.778819  | -2.749096 |
| H | -1.466497 | 2.222513  | -3.572864 |
| H | -0.317858 | 2.580210  | -2.263807 |
| H | -0.154760 | 1.085137  | -3.176697 |
| C | -1.889273 | -1.261315 | -2.940393 |
| H | -2.718673 | -1.304171 | -3.661600 |
| H | -0.980946 | -0.981340 | -3.485436 |
| H | -1.735900 | -2.260946 | -2.518015 |
| C | -3.540751 | -1.922232 | -0.339791 |
| H | -4.377426 | -2.172957 | -1.007930 |
| H | -2.761600 | -2.691757 | -0.434136 |
| H | -3.907134 | -1.937390 | 0.692169  |



**TS<sub>A1-B</sub>**

E = -1471.148671au

|    |           |           |           |
|----|-----------|-----------|-----------|
| Rh | 1.013098  | -0.065086 | -0.087536 |
| C  | 0.186511  | 1.733830  | 2.211447  |
| O  | 1.183067  | 1.252642  | 1.602224  |
| O  | -1.010903 | 1.359243  | 2.071299  |
| C  | 0.459393  | 2.879458  | 3.147580  |
| H  | 1.430289  | 2.755212  | 3.636256  |
| H  | 0.502842  | 3.802476  | 2.554374  |
| H  | -0.338659 | 2.975371  | 3.888965  |
| C  | 0.095495  | 2.575993  | -1.066320 |
| O  | -0.305295 | 1.359593  | -0.864361 |
| O  | 1.258865  | 2.965797  | -1.132218 |
| C  | -1.062872 | 3.547165  | -1.185059 |
| H  | -0.725996 | 4.498403  | -1.607267 |
| H  | -1.876096 | 3.123869  | -1.785132 |
| H  | -1.464324 | 3.726547  | -0.177404 |
| C  | 2.282718  | -0.266645 | -1.819693 |
| C  | 3.069108  | 0.049094  | -0.661191 |
| C  | 2.909354  | -1.034268 | 0.291932  |
| C  | 1.581581  | -1.497390 | -1.564214 |
| C  | 2.023801  | -1.993073 | -0.272709 |
| C  | -5.684345 | 0.402955  | -0.614924 |
| C  | -5.346424 | -0.854326 | -1.107128 |
| C  | -4.044024 | -1.323840 | -0.988999 |
| C  | -3.073778 | -0.522420 | -0.389809 |
| C  | -3.390987 | 0.741935  | 0.095162  |
| C  | -4.704507 | 1.188601  | -0.016294 |
| H  | -6.705649 | 0.769336  | -0.699342 |
| H  | -6.101931 | -1.481780 | -1.577454 |
| H  | -3.755554 | -2.307069 | -1.358765 |
| H  | -2.628206 | 1.377292  | 0.535103  |
| H  | -4.956602 | 2.177338  | 0.363912  |
| O  | -1.802158 | -1.059691 | -0.390756 |
| N  | -0.968145 | -0.752533 | 0.704284  |
| C  | -0.924229 | -1.801420 | 1.645104  |
| C  | -1.838895 | -2.972400 | 1.425374  |
| H  | -2.888530 | -2.651532 | 1.433718  |
| H  | -1.663240 | -3.433834 | 0.445499  |
| H  | -1.665051 | -3.699708 | 2.222856  |
| O  | -0.150239 | -1.715045 | 2.577910  |
| H  | -1.085326 | 0.281808  | 1.271045  |
| C  | 1.626169  | -3.279284 | 0.361171  |

|   |           |           |           |
|---|-----------|-----------|-----------|
| H | 2.469185  | -3.984237 | 0.340287  |
| H | 1.327320  | -3.141325 | 1.408946  |
| H | 0.792818  | -3.751003 | -0.172318 |
| C | 0.618308  | -2.170798 | -2.476913 |
| H | -0.157539 | -2.698443 | -1.908421 |
| H | 0.098861  | -1.435821 | -3.102649 |
| H | 1.119153  | -2.894156 | -3.136324 |
| C | 2.174985  | 0.578480  | -3.036007 |
| H | 2.988710  | 0.336001  | -3.735137 |
| H | 1.222827  | 0.415510  | -3.553628 |
| H | 2.234006  | 1.638948  | -2.768285 |
| C | 3.901926  | 1.266603  | -0.481768 |
| H | 4.781137  | 1.240900  | -1.141722 |
| H | 3.302140  | 2.155487  | -0.718373 |
| H | 4.252505  | 1.356572  | 0.552087  |
| C | 3.518153  | -1.080899 | 1.647804  |
| H | 4.602612  | -1.249842 | 1.587885  |
| H | 3.347606  | -0.132562 | 2.173697  |
| H | 3.076967  | -1.877564 | 2.256672  |

**B**

E = -1471.158032au

|    |           |           |           |
|----|-----------|-----------|-----------|
| Rh | 0.930614  | -0.137024 | -0.113545 |
| C  | 0.545180  | 1.883893  | 2.235256  |
| O  | 1.379615  | 1.237564  | 1.602990  |
| O  | -0.748106 | 1.698227  | 2.160796  |
| C  | 0.946168  | 3.010461  | 3.129846  |
| H  | 1.959091  | 2.848689  | 3.506195  |
| H  | 0.945851  | 3.933460  | 2.535203  |
| H  | 0.236945  | 3.131044  | 3.953250  |
| C  | 0.261688  | 2.600326  | -1.078484 |
| O  | -0.262884 | 1.447963  | -0.799376 |
| O  | 1.457167  | 2.856795  | -1.202416 |
| C  | -0.793387 | 3.684360  | -1.206258 |
| H  | -0.361871 | 4.600541  | -1.619724 |
| H  | -1.631401 | 3.342267  | -1.825336 |
| H  | -1.200527 | 3.897051  | -0.206794 |
| C  | 2.109367  | -0.436396 | -1.916660 |
| C  | 2.986271  | -0.224701 | -0.817106 |
| C  | 2.740704  | -1.278960 | 0.156255  |
| C  | 1.273626  | -1.581885 | -1.614819 |
| C  | 1.727896  | -2.138463 | -0.354869 |
| C  | -5.543426 | 0.620314  | -0.738246 |
| C  | -5.369715 | -0.747461 | -0.930659 |

|   |           |           |           |
|---|-----------|-----------|-----------|
| C | -4.127343 | -1.332327 | -0.718498 |
| C | -3.046768 | -0.543002 | -0.325086 |
| C | -3.205104 | 0.827112  | -0.134801 |
| C | -4.457565 | 1.395645  | -0.342507 |
| H | -6.517649 | 1.078840  | -0.897849 |
| H | -6.209957 | -1.368910 | -1.237164 |
| H | -3.971197 | -2.402493 | -0.850355 |
| H | -2.344897 | 1.442396  | 0.108224  |
| H | -4.576467 | 2.469840  | -0.203330 |
| O | -1.854454 | -1.214997 | -0.198923 |
| N | -0.946224 | -0.714536 | 0.773380  |
| C | -0.903165 | -1.551648 | 1.870333  |
| C | -2.011815 | -2.561158 | 2.041857  |
| H | -3.002740 | -2.097874 | 1.961445  |
| H | -1.957107 | -3.328421 | 1.258515  |
| H | -1.896675 | -3.029836 | 3.023064  |
| O | 0.004534  | -1.439790 | 2.688960  |
| H | -0.938103 | 0.918957  | 1.557698  |
| C | 1.210603  | -3.369165 | 0.301095  |
| H | 1.913331  | -4.202027 | 0.156528  |
| H | 1.074895  | -3.219727 | 1.379609  |
| H | 0.245962  | -3.672538 | -0.122808 |
| C | 0.219450  | -2.149095 | -2.496675 |
| H | -0.568825 | -2.631996 | -1.908611 |
| H | -0.265935 | -1.359991 | -3.082994 |
| H | 0.640532  | -2.885887 | -3.196287 |
| C | 2.023321  | 0.408522  | -3.135703 |
| H | 2.754180  | 0.064564  | -3.882351 |
| H | 1.027655  | 0.351650  | -3.590456 |
| H | 2.222281  | 1.458109  | -2.893594 |
| C | 3.964787  | 0.886026  | -0.681531 |
| H | 4.848027  | 0.711004  | -1.312784 |
| H | 3.494162  | 1.832228  | -0.975810 |
| H | 4.304593  | 0.988663  | 0.354981  |
| C | 3.429153  | -1.412268 | 1.466613  |
| H | 4.440593  | -1.822885 | 1.333360  |
| H | 3.521647  | -0.436626 | 1.959105  |
| H | 2.873014  | -2.069141 | 2.142575  |
| O | 0.135894  | -1.415578 | -1.787085 |
| C | -1.571472 | -3.092303 | -1.533979 |
| H | -1.474361 | -3.195612 | -2.618169 |
| H | -1.382832 | -4.056701 | -1.048232 |
| H | -2.595211 | -2.793594 | -1.276248 |
| C | 2.470069  | -1.003983 | 1.214933  |
| C | 3.002925  | -0.798249 | -0.080418 |
| C | 2.832194  | 0.608262  | -0.419420 |
| C | 1.945657  | 0.267842  | 1.694168  |
| C | 2.238490  | 1.266978  | 0.705190  |
| C | -5.327262 | -0.715820 | 0.263697  |
| C | -4.900310 | -0.207988 | 1.489171  |
| C | -3.652450 | 0.387100  | 1.609624  |
| C | -2.819770 | 0.476689  | 0.494093  |
| C | -3.231291 | -0.025286 | -0.738386 |
| C | -4.486086 | -0.620573 | -0.840310 |
| H | -6.307270 | -1.180107 | 0.171003  |
| H | -5.546088 | -0.275198 | 2.363666  |
| H | -3.300588 | 0.790711  | 2.557603  |
| H | -2.561729 | 0.039807  | -1.593943 |
| H | -4.808590 | -1.010380 | -1.805773 |
| O | -1.629041 | 1.121001  | 0.702016  |
| N | -0.721881 | 1.042020  | -0.373239 |
| C | -0.621334 | 2.196346  | -1.083663 |
| C | -1.662062 | 3.264663  | -0.835940 |
| H | -2.683666 | 2.872213  | -0.903510 |
| H | -1.545983 | 3.682894  | 0.172727  |
| H | -1.518846 | 4.055161  | -1.577546 |
| O | 0.283131  | 2.357990  | -1.905529 |
| C | 1.943971  | 2.720480  | 0.805638  |
| H | 2.792284  | 3.246238  | 1.266866  |
| H | 1.760354  | 3.152715  | -0.184487 |
| H | 1.057343  | 2.908199  | 1.424512  |
| C | 1.285080  | 0.478041  | 3.009914  |
| H | 0.621825  | 1.350240  | 2.986815  |
| H | 0.672039  | -0.390483 | 3.281598  |
| H | 2.026239  | 0.631419  | 3.808287  |
| C | 2.353241  | -2.288239 | 1.954991  |
| H | 3.033766  | -2.303265 | 2.818303  |
| H | 1.332251  | -2.434153 | 2.330125  |
| H | 2.593545  | -3.146087 | 1.317970  |
| C | 3.569602  | -1.818987 | -1.002384 |
| H | 4.649373  | -1.666390 | -1.140671 |
| H | 3.417137  | -2.835664 | -0.624259 |

## B1

E = -1242.1804605au

|    |           |           |           |
|----|-----------|-----------|-----------|
| Rh | 0.887557  | -0.241233 | -0.069322 |
| C  | -0.620797 | -2.063036 | -1.008197 |
| O  | -0.581230 | -1.827822 | 0.239723  |

|   |          |           |           |
|---|----------|-----------|-----------|
| H | 3.093310 | -1.758509 | -1.989409 |
| C | 3.256234 | 1.255819  | -1.688223 |
| H | 4.194974 | 1.811789  | -1.547584 |
| H | 3.419586 | 0.511356  | -2.475736 |
| H | 2.476423 | 1.943494  | -2.037729 |

### TS<sub>BI-C</sub>

E = -1242.1511381au

|    |           |           |           |
|----|-----------|-----------|-----------|
| Rh | -0.367213 | -0.270734 | 0.112088  |
| C  | -0.517768 | 1.865411  | 2.251322  |
| O  | -1.222283 | 1.041345  | 1.604820  |
| O  | 0.742057  | 1.910529  | 2.230107  |
| C  | -1.253640 | 2.880713  | 3.085931  |
| H  | -0.583513 | 3.349650  | 3.811289  |
| H  | -1.653023 | 3.652348  | 2.416193  |
| H  | -2.104895 | 2.413507  | 3.591214  |
| C  | -2.300858 | -1.117506 | -0.474106 |
| C  | -1.407840 | -1.185809 | -1.581383 |
| C  | -0.252569 | -1.961395 | -1.188870 |
| C  | -1.733481 | -1.912308 | 0.599603  |
| C  | -0.502545 | -2.466354 | 0.145921  |
| C  | 3.848749  | -1.133438 | 1.028702  |
| C  | 4.418257  | -0.422148 | -0.038824 |
| C  | 3.682912  | 0.501870  | -0.760176 |
| C  | 2.342415  | 0.710155  | -0.416439 |
| C  | 1.729987  | 0.030866  | 0.663089  |
| C  | 2.529308  | -0.895259 | 1.367693  |
| H  | 4.451184  | -1.840254 | 1.596480  |
| H  | 5.459702  | -0.596435 | -0.306914 |
| H  | 4.113976  | 1.049184  | -1.596039 |
| H  | 2.092595  | -1.402767 | 2.229810  |
| O  | 1.641651  | 1.578099  | -1.153797 |
| N  | 0.238247  | 1.398445  | -0.964002 |
| C  | -0.511780 | 2.423930  | -1.421834 |
| C  | 0.209179  | 3.612908  | -2.014144 |
| H  | 0.895207  | 4.059552  | -1.284683 |
| H  | 0.812562  | 3.319520  | -2.881682 |
| H  | -0.541890 | 4.346196  | -2.319283 |
| O  | -1.744996 | 2.367367  | -1.368963 |
| H  | 1.160837  | 0.885627  | 1.432697  |
| C  | 0.364214  | -3.424574 | 0.883927  |
| H  | 0.245784  | -3.328613 | 1.970000  |
| H  | 0.103115  | -4.457914 | 0.612378  |
| H  | 1.425062  | -3.276848 | 0.650783  |

|   |           |           |           |
|---|-----------|-----------|-----------|
| C | -2.360002 | -2.091317 | 1.937188  |
| H | -1.662116 | -2.538700 | 2.653796  |
| H | -2.680593 | -1.123972 | 2.343778  |
| H | -3.243818 | -2.742148 | 1.874383  |
| C | -3.553622 | -0.314842 | -0.428835 |
| H | -4.309454 | -0.716813 | -1.118985 |
| H | -3.983049 | -0.304280 | 0.578722  |
| H | -3.331141 | 0.723968  | -0.713913 |
| C | -1.622148 | -0.515620 | -2.891046 |
| H | -2.295769 | -1.122189 | -3.514249 |
| H | -2.070504 | 0.475223  | -2.749006 |
| H | -0.681907 | -0.388404 | -3.439122 |
| C | 0.922790  | -2.277975 | -2.048099 |
| H | 0.730915  | -3.144792 | -2.697161 |
| H | 1.174990  | -1.423032 | -2.688412 |
| H | 1.811818  | -2.496298 | -1.443068 |

### C

E = -1242.1730285au

|    |           |           |           |
|----|-----------|-----------|-----------|
| Rh | 0.431598  | -0.220990 | -0.064247 |
| C  | -0.717198 | 2.077024  | -1.935983 |
| O  | 0.197768  | 1.264100  | -1.877628 |
| O  | -1.970401 | 1.775997  | -1.636491 |
| C  | -0.511405 | 3.510301  | -2.284773 |
| H  | -1.429143 | 3.979185  | -2.648772 |
| H  | -0.194535 | 4.002273  | -1.353722 |
| H  | 0.297484  | 3.608272  | -3.013700 |
| C  | 2.273832  | -0.132527 | 1.218116  |
| C  | 1.532384  | -1.394350 | 1.277268  |
| C  | 1.653062  | -2.041742 | -0.014812 |
| C  | 2.690431  | 0.055015  | -0.105345 |
| C  | 2.268288  | -1.109536 | -0.887085 |
| C  | -3.087318 | -2.637325 | -1.064773 |
| C  | -4.004356 | -2.141144 | -0.138481 |
| C  | -3.657106 | -1.099423 | 0.712074  |
| C  | -2.371643 | -0.560293 | 0.629159  |
| C  | -1.414166 | -1.055177 | -0.274700 |
| C  | -1.803826 | -2.096718 | -1.121286 |
| H  | -3.372303 | -3.442589 | -1.740380 |
| H  | -5.007437 | -2.561920 | -0.084422 |
| H  | -4.364168 | -0.689917 | 1.431639  |
| H  | -1.085418 | -2.493063 | -1.842790 |
| O  | -2.050852 | 0.468567  | 1.448971  |
| N  | -0.776554 | 0.987875  | 1.076899  |

|   |           |           |           |
|---|-----------|-----------|-----------|
| C | -0.641979 | 2.314871  | 1.278803  |
| C | -1.792043 | 3.048430  | 1.927863  |
| H | -2.676335 | 3.017656  | 1.278334  |
| H | -2.082222 | 2.590707  | 2.880430  |
| H | -1.488476 | 4.086632  | 2.088213  |
| O | 0.389035  | 2.901041  | 0.920266  |
| H | -1.988115 | 0.843111  | -1.316175 |
| C | 3.343652  | 1.261286  | -0.682411 |
| H | 3.575749  | 1.998003  | 0.093468  |
| H | 4.277521  | 1.002805  | -1.202145 |
| H | 2.674186  | 1.746306  | -1.407162 |
| C | 2.452086  | 0.814311  | 2.354252  |
| H | 2.308633  | 1.850876  | 2.029324  |
| H | 1.719033  | 0.623859  | 3.146569  |
| H | 3.453816  | 0.709188  | 2.795452  |
| C | 0.945933  | -1.994583 | 2.507808  |
| H | 0.217234  | -2.774838 | 2.257530  |
| H | 1.722337  | -2.442930 | 3.145517  |
| H | 0.418327  | -1.234904 | 3.098245  |
| C | 1.198572  | -3.422454 | -0.335785 |
| H | 1.125541  | -3.584344 | -1.417878 |
| H | 1.910140  | -4.161535 | 0.060382  |
| H | 0.214040  | -3.639170 | 0.096634  |
| C | 2.543775  | -1.281278 | -2.339745 |
| H | 2.402195  | -0.336416 | -2.878280 |
| H | 3.579730  | -1.610207 | -2.511725 |
| H | 1.875894  | -2.023377 | -2.793703 |

## C1

E = -1013.204986au

|    |           |           |           |
|----|-----------|-----------|-----------|
| Rh | 0.220225  | -0.097724 | 0.025027  |
| C  | 2.422149  | -0.006325 | 0.626019  |
| C  | 1.739268  | -1.181956 | 1.140535  |
| C  | 1.329592  | -1.996277 | 0.037752  |
| C  | 2.333472  | -0.043346 | -0.775375 |
| C  | 1.618508  | -1.257571 | -1.150187 |
| C  | -3.709359 | -2.036722 | -0.029598 |
| C  | -4.536404 | -0.906378 | 0.000398  |
| C  | -3.986119 | 0.361018  | 0.035818  |
| C  | -2.592142 | 0.481399  | 0.041206  |
| C  | -1.722511 | -0.623487 | 0.021599  |
| C  | -2.330782 | -1.889071 | -0.019298 |
| H  | -4.151937 | -3.031540 | -0.062420 |
| H  | -5.619133 | -1.022646 | -0.007486 |

|   |           |           |           |
|---|-----------|-----------|-----------|
| H | -4.604381 | 1.256738  | 0.053124  |
| H | -1.710400 | -2.784920 | -0.043915 |
| O | -2.078337 | 1.726992  | 0.058014  |
| N | -0.677736 | 1.671601  | 0.034872  |
| C | -0.130480 | 2.936084  | -0.000176 |
| C | -1.068616 | 4.114846  | 0.026179  |
| H | -1.750140 | 4.092875  | -0.831958 |
| H | -1.693681 | 4.102029  | 0.926462  |
| H | -0.466828 | 5.026810  | 0.002060  |
| O | 1.085974  | 3.073409  | -0.053806 |
| C | 1.589613  | -1.530222 | 2.578301  |
| H | 2.477973  | -2.063664 | 2.949606  |
| H | 1.458272  | -0.632525 | 3.193934  |
| H | 0.716685  | -2.172288 | 2.743161  |
| C | 0.786381  | -3.379507 | 0.123600  |
| H | 1.603113  | -4.109859 | 0.220935  |
| H | 0.127986  | -3.508119 | 0.992015  |
| H | 0.213631  | -3.650236 | -0.771653 |
| C | 1.335511  | -1.691415 | -2.544385 |
| H | 2.182867  | -2.255200 | -2.963408 |
| H | 0.446119  | -2.331870 | -2.588588 |
| H | 1.154173  | -0.830599 | -3.198791 |
| C | 2.839968  | 0.981323  | -1.726736 |
| H | 3.790537  | 0.664518  | -2.181712 |
| H | 2.122239  | 1.150602  | -2.539945 |
| H | 2.987148  | 1.942685  | -1.225532 |
| C | 3.052513  | 1.067442  | 1.442563  |
| H | 4.133073  | 1.121404  | 1.247999  |
| H | 2.612215  | 2.042322  | 1.197243  |
| H | 2.920016  | 0.887643  | 2.515568  |

## C2

E = -1432.0094525au

|    |           |           |           |
|----|-----------|-----------|-----------|
| Rh | 0.336531  | -0.339877 | 0.211117  |
| C  | 0.905276  | -2.442290 | 1.012115  |
| C  | 1.320396  | -1.313296 | 1.835095  |
| C  | 0.131472  | -0.703587 | 2.378074  |
| C  | -0.491589 | -2.418981 | 0.933482  |
| C  | -0.984920 | -1.309968 | 1.742925  |
| C  | 0.431550  | 3.893620  | 1.336699  |
| C  | 1.634893  | 4.279931  | 0.750187  |
| C  | 2.383982  | 3.365921  | 0.020311  |
| C  | 1.917423  | 2.057506  | -0.110747 |
| C  | 0.712744  | 1.636261  | 0.470611  |

|   |           |           |           |
|---|-----------|-----------|-----------|
| C | -0.015741 | 2.578652  | 1.197613  |
| H | -0.158818 | 4.612188  | 1.903956  |
| H | 1.991169  | 5.303807  | 0.853917  |
| H | 3.322725  | 3.646430  | -0.454617 |
| H | -0.953417 | 2.285267  | 1.675540  |
| O | 2.673930  | 1.177851  | -0.803169 |
| N | 1.890319  | 0.027901  | -1.130924 |
| C | 2.609996  | -0.866703 | -1.851444 |
| C | 4.027268  | -0.501868 | -2.228083 |
| H | 4.060957  | 0.432775  | -2.799456 |
| H | 4.642650  | -0.342441 | -1.333409 |
| H | 4.440453  | -1.318935 | -2.825458 |
| O | 2.103199  | -1.932656 | -2.223147 |
| C | -1.338629 | -3.415842 | 0.224891  |
| H | -0.793068 | -3.888100 | -0.602293 |
| H | -1.652251 | -4.218092 | 0.910511  |
| H | -2.257522 | -2.967290 | -0.176218 |
| C | 1.806856  | -3.449255 | 0.388618  |
| H | 1.640869  | -3.524333 | -0.692280 |
| H | 2.861427  | -3.182432 | 0.526010  |
| H | 1.651949  | -4.437700 | 0.845909  |
| C | 2.723552  | -1.000102 | 2.225739  |
| H | 2.810182  | 0.023504  | 2.609633  |
| H | 3.085206  | -1.687363 | 3.005729  |
| H | 3.399342  | -1.084281 | 1.365389  |
| C | 0.096182  | 0.312724  | 3.464735  |
| H | -0.872790 | 0.822856  | 3.514655  |
| H | 0.257133  | -0.177994 | 4.436213  |
| H | 0.868244  | 1.080939  | 3.341808  |
| C | -2.419001 | -1.023071 | 2.026712  |
| H | -3.062309 | -1.304852 | 1.184069  |
| H | -2.765713 | -1.579335 | 2.910941  |
| H | -2.592248 | 0.044743  | 2.212792  |
| C | -1.157396 | 0.020127  | -1.661088 |
| C | -2.536888 | 0.307671  | -1.170196 |
| C | -3.552886 | -0.640699 | -1.331828 |
| C | -2.852733 | 1.523140  | -0.548229 |
| C | -4.840674 | -0.388233 | -0.864412 |
| H | -3.347010 | -1.581532 | -1.839354 |
| C | -4.139126 | 1.773948  | -0.093326 |
| H | -2.074577 | 2.274434  | -0.410059 |
| C | -5.141547 | 0.816840  | -0.242024 |
| H | -5.614915 | -1.141633 | -1.002355 |
| H | -4.360176 | 2.727993  | 0.383059  |

|   |           |           |           |
|---|-----------|-----------|-----------|
| H | -6.149638 | 1.014734  | 0.117267  |
| C | -0.933855 | -1.177443 | -2.566234 |
| H | 0.125018  | -1.291830 | -2.820363 |
| H | -1.211265 | -2.086985 | -2.023982 |
| H | -1.549833 | -1.118086 | -3.477321 |
| N | -0.573590 | 1.132672  | -2.173207 |
| N | -0.014204 | 2.054630  | -2.506035 |

### TS<sub>C2-D</sub>

E = -1431.9459712au

|    |           |           |           |
|----|-----------|-----------|-----------|
| N  | 1.832547  | 0.349328  | -1.071176 |
| C  | 1.442766  | 2.303612  | 0.015123  |
| C  | 1.717807  | 3.642835  | 0.287283  |
| H  | 2.653155  | 4.077805  | -0.061562 |
| C  | 0.784889  | 4.389029  | 0.996262  |
| C  | -0.406836 | 3.802406  | 1.417079  |
| H  | -1.142005 | 4.388505  | 1.967367  |
| C  | -0.658883 | 2.459126  | 1.133954  |
| H  | -1.598116 | 2.013668  | 1.469042  |
| C  | 0.259975  | 1.680955  | 0.431646  |
| C  | 0.918524  | -2.495019 | 0.886043  |
| C  | 1.642772  | -1.441798 | 1.568659  |
| C  | 0.719871  | -0.667072 | 2.330069  |
| C  | -0.600747 | -1.148078 | 2.021138  |
| C  | -0.447294 | -2.318367 | 1.186669  |
| Rh | 0.311579  | -0.334634 | 0.150464  |
| C  | -1.569975 | -3.232423 | 0.842076  |
| H  | -1.805501 | -3.872250 | 1.706020  |
| H  | -2.487631 | -2.681207 | 0.600257  |
| H  | -1.332017 | -3.898503 | 0.003509  |
| C  | 1.545246  | -3.580250 | 0.079590  |
| H  | 2.194160  | -4.214051 | 0.702013  |
| H  | 0.786627  | -4.231164 | -0.372331 |
| H  | 2.146437  | -3.163256 | -0.739654 |
| C  | 3.125368  | -1.272970 | 1.545940  |
| H  | 3.581123  | -1.663848 | 2.467800  |
| H  | 3.567731  | -1.811280 | 0.698767  |
| H  | 3.413442  | -0.217094 | 1.458264  |
| C  | 1.071574  | 0.417317  | 3.288025  |
| H  | 1.152801  | 0.017936  | 4.309944  |
| H  | 2.032525  | 0.881105  | 3.032405  |
| H  | 0.323974  | 1.219087  | 3.297838  |
| C  | -1.878353 | -0.708798 | 2.652826  |
| H  | -2.134002 | -1.331012 | 3.524824  |

|   |           |           |           |
|---|-----------|-----------|-----------|
| H | -1.814054 | 0.328775  | 3.002819  |
| H | -2.719813 | -0.764618 | 1.947309  |
| C | -1.059162 | -0.385980 | -1.411503 |
| N | 0.456607  | 1.248158  | -2.921365 |
| O | 2.387763  | 1.583903  | -0.646591 |
| C | 2.729583  | -0.379645 | -1.799407 |
| O | 2.446122  | -1.522984 | -2.163403 |
| C | 4.032420  | 0.275837  | -2.179016 |
| H | 4.619891  | 0.533982  | -1.288970 |
| H | 4.594330  | -0.420148 | -2.807202 |
| H | 3.852669  | 1.211421  | -2.722161 |
| C | -0.861947 | -1.620915 | -2.267250 |
| H | -1.500779 | -1.626669 | -3.163915 |
| H | 0.192893  | -1.741481 | -2.541273 |
| H | -1.133855 | -2.496850 | -1.664067 |
| C | -2.474255 | -0.011694 | -1.142836 |
| C | -2.849647 | 1.310978  | -0.869833 |
| C | -3.472320 | -0.995538 | -1.105770 |
| C | -4.155986 | 1.628241  | -0.529431 |
| H | -2.099711 | 2.097498  | -0.923243 |
| C | -4.779260 | -0.680920 | -0.741595 |
| H | -3.232906 | -2.024370 | -1.366661 |
| C | -5.126241 | 0.630916  | -0.445263 |
| H | -4.418121 | 2.665140  | -0.324286 |
| H | -5.530657 | -1.468376 | -0.707211 |
| H | -6.148697 | 0.880330  | -0.166978 |
| N | -0.516738 | 0.807483  | -2.576892 |
| H | 0.987728  | 5.436628  | 1.213543  |

## D

E = -1322.5757728au

|    |           |           |           |
|----|-----------|-----------|-----------|
| Rh | -0.197737 | -0.227705 | 0.168912  |
| C  | 0.332285  | -1.127733 | 2.211580  |
| C  | -0.897424 | -1.743793 | 1.760640  |
| C  | -0.606702 | -2.472666 | 0.584077  |
| C  | 1.376573  | -1.505520 | 1.327391  |
| C  | 0.790995  | -2.288560 | 0.274121  |
| C  | -3.105863 | -0.548924 | -3.086566 |
| C  | -4.126287 | 0.244128  | -2.570669 |
| C  | -3.963509 | 0.908677  | -1.358158 |
| C  | -2.765916 | 0.762925  | -0.662167 |
| C  | -1.742274 | -0.063432 | -1.144086 |
| C  | -1.914616 | -0.692063 | -2.369984 |
| H  | -3.232132 | -1.053471 | -4.043394 |

|   |           |           |           |
|---|-----------|-----------|-----------|
| H | -5.059274 | 0.360641  | -3.120180 |
| H | -4.743474 | 1.550653  | -0.951724 |
| H | -1.109377 | -1.312221 | -2.773060 |
| O | -2.608153 | 1.437836  | 0.508645  |
| N | -1.255630 | 1.325561  | 0.957152  |
| C | -0.716668 | 2.486413  | 1.400644  |
| C | -1.651317 | 3.652827  | 1.610843  |
| H | -2.030530 | 4.009449  | 0.643932  |
| H | -2.525617 | 3.375113  | 2.209700  |
| H | -1.095623 | 4.454989  | 2.103720  |
| O | 0.493823  | 2.568720  | 1.635844  |
| C | 2.814754  | -1.170394 | 1.512804  |
| H | 2.938909  | -0.143220 | 1.881386  |
| H | 3.279686  | -1.844478 | 2.248070  |
| H | 3.383438  | -1.253284 | 0.578942  |
| C | 0.494939  | -0.281961 | 3.428282  |
| H | 1.063925  | 0.627809  | 3.199885  |
| H | -0.476106 | 0.036940  | 3.823958  |
| H | 1.018356  | -0.831460 | 4.224844  |
| C | -2.222572 | -1.605691 | 2.430085  |
| H | -3.037327 | -1.942463 | 1.777558  |
| H | -2.271143 | -2.197212 | 3.356115  |
| H | -2.425592 | -0.558263 | 2.688590  |
| C | -1.547278 | -3.316061 | -0.203553 |
| H | -1.356307 | -3.239847 | -1.281298 |
| H | -1.445981 | -4.375706 | 0.074768  |
| H | -2.591099 | -3.022445 | -0.042009 |
| C | 1.521920  | -3.023299 | -0.797952 |
| H | 2.487544  | -2.556073 | -1.024699 |
| H | 1.720402  | -4.062841 | -0.494987 |
| H | 0.942364  | -3.063284 | -1.730128 |
| C | 0.801797  | 0.992270  | -0.891267 |
| C | 2.255672  | 0.834935  | -1.045874 |
| C | 3.122187  | 1.625059  | -0.278059 |
| C | 2.781708  | -0.044984 | -1.997085 |
| C | 4.496481  | 1.510997  | -0.451659 |
| H | 2.691918  | 2.297606  | 0.465390  |
| C | 4.158457  | -0.138683 | -2.174971 |
| H | 2.099932  | -0.643293 | -2.604083 |
| C | 5.018975  | 0.633614  | -1.399040 |
| H | 5.165372  | 2.117794  | 0.156961  |
| H | 4.559719  | -0.818885 | -2.925099 |
| H | 6.096044  | 0.554496  | -1.535963 |
| C | 0.291402  | 2.196785  | -1.594129 |

|   |           |          |           |
|---|-----------|----------|-----------|
| H | -0.749180 | 2.449161 | -1.377568 |
| H | 0.946969  | 3.060323 | -1.401466 |
| H | 0.370084  | 1.989631 | -2.676676 |

**TS<sub>D-E</sub>**

**E = -1322.5088509au**

|    |           |           |           |
|----|-----------|-----------|-----------|
| N  | 1.953242  | 0.203539  | -0.977547 |
| C  | 1.615573  | 2.190839  | 0.143101  |
| C  | 2.070726  | 3.427812  | 0.602641  |
| C  | 1.284057  | 4.162992  | 1.476818  |
| H  | 1.637576  | 5.130240  | 1.830820  |
| C  | 0.052717  | 3.667626  | 1.900191  |
| H  | -0.570434 | 4.245206  | 2.580676  |
| C  | -0.384040 | 2.428340  | 1.440086  |
| H  | -1.354948 | 2.068240  | 1.776594  |
| C  | 0.380497  | 1.657270  | 0.561902  |
| C  | 0.217597  | -2.651046 | 0.173255  |
| C  | 1.387090  | -2.212740 | 0.893655  |
| C  | 0.971863  | -1.435183 | 2.001553  |
| C  | -0.472144 | -1.388482 | 1.981422  |
| C  | -0.931993 | -2.170133 | 0.872038  |
| Rh | 0.291996  | -0.390369 | 0.092405  |
| C  | -2.338535 | -2.538783 | 0.540746  |
| H  | -2.593082 | -2.312880 | -0.504541 |
| H  | -2.492994 | -3.617501 | 0.689410  |
| H  | -3.064662 | -2.013169 | 1.170021  |
| C  | 0.223213  | -3.550809 | -1.013560 |
| H  | 0.546245  | -4.566477 | -0.737526 |
| H  | -0.777161 | -3.628250 | -1.456458 |
| H  | 0.904593  | -3.163829 | -1.781239 |
| C  | 2.783962  | -2.540020 | 0.497172  |
| H  | 3.071954  | -3.525672 | 0.892052  |
| H  | 2.878735  | -2.565267 | -0.595400 |
| H  | 3.497707  | -1.801939 | 0.881510  |
| C  | 1.840423  | -0.763047 | 3.010144  |
| H  | 1.922655  | -1.350189 | 3.937506  |
| H  | 2.854878  | -0.613425 | 2.620194  |
| H  | 1.449410  | 0.227724  | 3.277339  |
| C  | -1.296164 | -0.797185 | 3.075979  |
| H  | -1.121552 | -1.338383 | 4.017787  |
| H  | -1.042506 | 0.255463  | 3.263172  |
| H  | -2.371117 | -0.855168 | 2.864340  |
| C  | -0.802482 | 0.732051  | -1.077640 |
| C  | -2.266546 | 0.702010  | -0.977790 |

|   |           |           |           |
|---|-----------|-----------|-----------|
| C | -3.045890 | 0.706518  | -2.152543 |
| C | -2.948060 | 0.584690  | 0.243614  |
| C | -4.426419 | 0.573800  | -2.101170 |
| H | -2.561485 | 0.775872  | -3.123918 |
| C | -4.331779 | 0.503356  | 0.298437  |
| H | -2.371206 | 0.556731  | 1.162645  |
| C | -5.079728 | 0.486865  | -0.874857 |
| H | -4.997841 | 0.550183  | -3.027545 |
| H | -4.827196 | 0.433915  | 1.266630  |
| H | -6.164299 | 0.404118  | -0.834503 |
| O | 2.417664  | 1.531596  | -0.716120 |
| C | 2.448714  | -0.294990 | -2.133063 |
| O | 2.085273  | -1.398186 | -2.553850 |
| C | 3.481976  | 0.525797  | -2.871589 |
| H | 3.048195  | 1.468074  | -3.231324 |
| H | 4.325821  | 0.793783  | -2.225658 |
| H | 3.833353  | -0.063722 | -3.722495 |
| C | -0.284873 | 1.473020  | -2.274264 |
| H | -0.176927 | 0.737849  | -3.090111 |
| H | -0.965399 | 2.267196  | -2.609547 |
| H | 0.705610  | 1.904854  | -2.129966 |
| H | 3.041521  | 3.787530  | 0.266217  |

**E**

**E = -1322.6068475au**

|    |           |           |           |
|----|-----------|-----------|-----------|
| N  | 0.244964  | -1.687334 | 0.683701  |
| C  | 2.483622  | -1.354089 | 0.147221  |
| C  | 3.608614  | -2.172049 | 0.177225  |
| H  | 3.665537  | -2.933535 | 0.953595  |
| C  | 4.623072  | -2.003120 | -0.753915 |
| H  | 5.505107  | -2.640531 | -0.727270 |
| C  | 4.483825  | -1.017162 | -1.721406 |
| H  | 5.261072  | -0.863055 | -2.468390 |
| C  | 3.352141  | -0.209190 | -1.734876 |
| H  | 3.295044  | 0.567090  | -2.494025 |
| C  | 2.312757  | -0.332828 | -0.800247 |
| C  | -2.489509 | 0.330780  | -1.472801 |
| C  | -2.951144 | -0.751690 | -0.592098 |
| C  | -2.855659 | -0.307427 | 0.728623  |
| C  | -2.282272 | 1.034094  | 0.686480  |
| C  | -2.203612 | 1.466480  | -0.683022 |
| Rh | -0.765577 | -0.190703 | -0.176826 |
| C  | -1.964186 | 2.868063  | -1.120191 |
| H  | -2.836170 | 3.488692  | -0.865284 |

|   |           |           |           |    |           |           |           |
|---|-----------|-----------|-----------|----|-----------|-----------|-----------|
| H | -1.091025 | 3.313883  | -0.625717 | N  | 1.381195  | 1.481294  | -0.873195 |
| H | -1.817540 | 2.947224  | -2.203852 | C  | -0.658341 | 2.369892  | 0.633467  |
| C | -2.517889 | 0.239252  | -2.956663 | C  | -0.909878 | 3.659595  | 1.132589  |
| H | -3.553691 | 0.280241  | -3.326443 | H  | -0.184840 | 4.098031  | 1.816859  |
| H | -1.960558 | 1.053461  | -3.432631 | C  | -2.072314 | 4.322336  | 0.775929  |
| H | -2.086496 | -0.709609 | -3.301861 | H  | -2.272438 | 5.314697  | 1.178207  |
| C | -3.428074 | -2.060134 | -1.107090 | C  | -2.982936 | 3.724588  | -0.097655 |
| H | -4.222255 | -1.907506 | -1.853214 | H  | -3.890453 | 4.250722  | -0.388662 |
| H | -2.611506 | -2.613184 | -1.590184 | C  | -2.718660 | 2.458050  | -0.608372 |
| H | -3.810581 | -2.700239 | -0.308951 | H  | -3.432036 | 1.989050  | -1.288524 |
| C | -3.186802 | -1.034606 | 1.982884  | C  | -1.545556 | 1.778124  | -0.278585 |
| H | -4.091261 | -0.617515 | 2.450392  | C  | 1.638448  | -2.005318 | -0.687637 |
| H | -3.330680 | -2.102870 | 1.802438  | C  | 2.630139  | -1.410318 | 0.195136  |
| H | -2.368844 | -0.945536 | 2.710882  | C  | 2.035602  | -1.273165 | 1.457838  |
| C | -2.035572 | 1.895329  | 1.871164  | C  | 0.689306  | -1.838216 | 1.396579  |
| H | -2.959882 | 2.421015  | 2.158971  | C  | 0.502996  | -2.392424 | 0.100501  |
| H | -1.708474 | 1.302282  | 2.733855  | Rh | 0.701518  | -0.139029 | -0.040659 |
| H | -1.265780 | 2.650326  | 1.669387  | C  | -0.605866 | -3.262954 | -0.364837 |
| C | 1.144075  | 0.641969  | -0.817394 | H  | -0.281221 | -4.314118 | -0.351286 |
| O | 1.576075  | -1.570744 | 1.153486  | H  | -1.499045 | -3.175918 | 0.262522  |
| C | -0.280683 | -2.919104 | 0.997043  | H  | -0.910831 | -3.026014 | -1.392128 |
| O | -1.449417 | -3.183789 | 0.732426  | C  | 1.889260  | -2.338738 | -2.117317 |
| C | 0.629102  | -3.936585 | 1.641893  | H  | 2.537393  | -3.224132 | -2.207884 |
| H | 1.465311  | -4.181662 | 0.974908  | H  | 0.956536  | -2.554286 | -2.651852 |
| H | 1.062494  | -3.562283 | 2.575849  | H  | 2.386726  | -1.506887 | -2.634091 |
| H | 0.041461  | -4.838251 | 1.834647  | C  | 4.009089  | -1.041634 | -0.226997 |
| C | 0.884926  | 1.111862  | -2.245299 | H  | 4.558846  | -1.937639 | -0.550399 |
| H | -0.012576 | 1.733580  | -2.315570 | H  | 4.015079  | -0.337060 | -1.071582 |
| H | 1.709249  | 1.719545  | -2.657126 | H  | 4.577451  | -0.587274 | 0.592996  |
| H | 0.753145  | 0.249560  | -2.912569 | C  | 2.612645  | -0.646313 | 2.678479  |
| C | 1.369215  | 1.774033  | 0.153785  | H  | 2.717172  | -1.381854 | 3.489584  |
| C | 1.631365  | 1.529209  | 1.516228  | H  | 3.603732  | -0.217781 | 2.488367  |
| C | 1.333594  | 3.116898  | -0.252230 | H  | 1.965647  | 0.160413  | 3.050125  |
| C | 1.814214  | 2.568069  | 2.416625  | C  | -0.194100 | -1.978992 | 2.587548  |
| H | 1.673181  | 0.500077  | 1.869419  | H  | 0.192263  | -2.747327 | 3.274267  |
| C | 1.515788  | 4.161353  | 0.653713  | H  | -0.253066 | -1.036400 | 3.149470  |
| H | 1.172189  | 3.365408  | -1.299662 | H  | -1.215127 | -2.258444 | 2.306711  |
| C | 1.751712  | 3.896476  | 1.995680  | C  | -1.241921 | 0.414358  | -0.875163 |
| H | 2.010698  | 2.337568  | 3.463408  | O  | 0.412097  | 1.704005  | 1.046527  |
| H | 1.483043  | 5.190232  | 0.295867  | C  | 2.685621  | 1.812876  | -0.950956 |
| H | 1.897006  | 4.709532  | 2.705129  | O  | 3.232303  | 1.654311  | -2.047372 |
|   |           |           |           | C  | 3.347250  | 2.441079  | 0.243359  |
|   |           |           |           | H  | 3.119016  | 1.894643  | 1.165580  |
|   |           |           |           | H  | 4.427494  | 2.480883  | 0.065100  |

**TS<sub>E-F</sub>**

E = -1322.5697499au



|   |           |           |           |
|---|-----------|-----------|-----------|
| H | 2.962688  | 3.460043  | 0.375032  |
| C | -1.022138 | 0.482947  | -2.381441 |
| H | -0.656324 | -0.472105 | -2.787224 |
| H | -1.963730 | 0.725247  | -2.904582 |
| H | -0.290036 | 1.255332  | -2.629203 |
| C | -2.318992 | -0.547064 | -0.476693 |
| C | -2.764240 | -0.586127 | 0.857358  |
| C | -2.966545 | -1.389577 | -1.391387 |
| C | -3.778347 | -1.441880 | 1.260532  |
| H | -2.296460 | 0.077936  | 1.585831  |
| C | -3.993966 | -2.241656 | -0.992503 |
| H | -2.674284 | -1.379684 | -2.439986 |
| C | -4.401579 | -2.279683 | 0.334776  |
| H | -4.095785 | -1.446807 | 2.302957  |
| H | -4.479945 | -2.877672 | -1.731430 |
| H | -5.206150 | -2.943619 | 0.646707  |

## F

E = -1322.5868863au

|    |           |           |           |
|----|-----------|-----------|-----------|
| N  | 1.317169  | 1.578287  | -0.790687 |
| C  | -1.175690 | 1.963637  | 1.017803  |
| C  | -1.693170 | 3.037687  | 1.754429  |
| H  | -1.310182 | 3.213992  | 2.758243  |
| C  | -2.642823 | 3.871778  | 1.178746  |
| H  | -3.022396 | 4.719845  | 1.748007  |
| C  | -3.098230 | 3.647009  | -0.119541 |
| H  | -3.839788 | 4.306904  | -0.565854 |
| C  | -2.603434 | 2.561892  | -0.838696 |
| H  | -2.978656 | 2.360788  | -1.843075 |
| C  | -1.656646 | 1.710653  | -0.274322 |
| C  | 1.420525  | -2.017004 | -0.416390 |
| C  | 2.576022  | -1.244552 | -0.012540 |
| C  | 2.394405  | -0.871329 | 1.348988  |
| C  | 1.155672  | -1.460430 | 1.799668  |
| C  | 0.584506  | -2.205749 | 0.734698  |
| Rh | 0.723918  | 0.056889  | 0.101331  |
| C  | -0.576169 | -3.127249 | 0.846784  |
| H  | -0.248702 | -4.097153 | 1.250488  |
| H  | -1.350913 | -2.730816 | 1.512680  |
| H  | -1.051738 | -3.313757 | -0.121570 |
| C  | 1.247722  | -2.671265 | -1.743085 |
| H  | 1.776073  | -3.635741 | -1.779441 |
| H  | 0.190497  | -2.867767 | -1.960813 |
| H  | 1.648764  | -2.046665 | -2.552544 |

|   |           |           |           |
|---|-----------|-----------|-----------|
| C | 3.798347  | -1.003535 | -0.825759 |
| H | 4.538443  | -1.793919 | -0.632587 |
| H | 3.585980  | -1.015708 | -1.902253 |
| H | 4.264104  | -0.041282 | -0.579629 |
| C | 3.295017  | -0.006680 | 2.161272  |
| H | 4.113369  | -0.589367 | 2.610472  |
| H | 3.725151  | 0.795100  | 1.545673  |
| H | 2.736145  | 0.472633  | 2.974196  |
| C | 0.571089  | -1.271589 | 3.152269  |
| H | -0.213588 | -2.007986 | 3.358304  |
| H | 1.337633  | -1.359911 | 3.932663  |
| H | 0.123425  | -0.266295 | 3.221175  |
| C | -1.213216 | 0.440990  | -0.959880 |
| O | -0.237689 | 1.171791  | 1.525699  |
| C | 2.595164  | 1.858221  | -1.137710 |
| O | 3.478922  | 2.171334  | -0.340224 |
| C | 2.816822  | 1.861150  | -2.637902 |
| H | 2.183883  | 1.122965  | -3.148454 |
| H | 2.576293  | 2.851104  | -3.044213 |
| H | 3.875377  | 1.653169  | -2.833390 |
| C | -0.903032 | 0.636358  | -2.433498 |
| H | -0.255767 | -0.157160 | -2.834634 |
| H | -1.828794 | 0.628243  | -3.032449 |
| H | -0.391593 | 1.592556  | -2.583651 |
| C | -2.140851 | -0.701211 | -0.693826 |
| C | -2.892299 | -0.767464 | 0.493445  |
| C | -2.381736 | -1.691127 | -1.661686 |
| C | -3.839942 | -1.761774 | 0.693578  |
| H | -2.747980 | -0.005159 | 1.257857  |
| C | -3.331902 | -2.687831 | -1.461105 |
| H | -1.839127 | -1.672318 | -2.605622 |
| C | -4.069057 | -2.728826 | -0.283020 |
| H | -4.417127 | -1.772003 | 1.617251  |
| H | -3.504417 | -3.428764 | -2.240905 |
| H | -4.823311 | -3.499073 | -0.131145 |

## TS<sub>F-G</sub>

E = -1322.58178au

|   |           |           |           |
|---|-----------|-----------|-----------|
| N | -0.859357 | -1.759848 | -0.699163 |
| C | 1.658237  | -1.547651 | 1.147824  |
| C | 2.401908  | -2.398655 | 2.000361  |
| H | 2.186614  | -2.367927 | 3.066926  |
| C | 3.272691  | -3.323369 | 1.460896  |
| H | 3.787875  | -4.018923 | 2.123153  |

|    |           |           |           |
|----|-----------|-----------|-----------|
| C  | 3.480159  | -3.409271 | 0.073943  |
| H  | 4.168780  | -4.146135 | -0.333866 |
| C  | 2.832857  | -2.521578 | -0.764652 |
| H  | 3.040378  | -2.542707 | -1.834164 |
| C  | 1.993853  | -1.522284 | -0.239424 |
| C  | -1.680941 | 1.858176  | -0.383595 |
| C  | -2.705804 | 0.851663  | -0.214806 |
| C  | -2.700961 | 0.447158  | 1.158428  |
| C  | -1.636060 | 1.155622  | 1.809096  |
| C  | -1.036824 | 2.062479  | 0.871146  |
| Rh | -0.756243 | -0.108565 | 0.196219  |
| C  | 0.019009  | 3.056183  | 1.204972  |
| H  | -0.396721 | 3.891760  | 1.787508  |
| H  | 0.820596  | 2.602826  | 1.803209  |
| H  | 0.488940  | 3.473846  | 0.307129  |
| C  | -1.446500 | 2.603753  | -1.649332 |
| H  | -2.229069 | 3.362046  | -1.801901 |
| H  | -0.479473 | 3.118088  | -1.646400 |
| H  | -1.471509 | 1.932202  | -2.519588 |
| C  | -3.729011 | 0.448688  | -1.219566 |
| H  | -4.642417 | 1.050283  | -1.098754 |
| H  | -3.374778 | 0.593968  | -2.248022 |
| H  | -4.008148 | -0.606906 | -1.101183 |
| C  | -3.624215 | -0.549318 | 1.766186  |
| H  | -4.647505 | -0.146489 | 1.809647  |
| H  | -3.640633 | -1.475827 | 1.174031  |
| H  | -3.322278 | -0.803898 | 2.788150  |
| C  | -1.236382 | 0.994506  | 3.232386  |
| H  | -1.871309 | 1.605810  | 3.890278  |
| H  | -1.318713 | -0.051685 | 3.549245  |
| H  | -0.193706 | 1.293068  | 3.385890  |
| C  | 1.549451  | -0.418266 | -1.067470 |
| O  | 0.662759  | -0.856300 | 1.594120  |
| C  | -2.023844 | -2.247336 | -1.191412 |
| O  | -2.939497 | -2.718151 | -0.510380 |
| C  | -2.098858 | -2.253077 | -2.710209 |
| H  | -1.782372 | -1.286462 | -3.127403 |
| H  | -1.436587 | -3.024469 | -3.122542 |
| H  | -3.129196 | -2.470787 | -3.013930 |
| C  | 1.296042  | -0.729810 | -2.515691 |
| H  | 0.517964  | -0.082397 | -2.937577 |
| H  | 2.208099  | -0.565423 | -3.112908 |
| H  | 0.961086  | -1.764233 | -2.631313 |
| C  | 2.047000  | 0.941283  | -0.780205 |

|   |          |          |           |
|---|----------|----------|-----------|
| C | 2.853188 | 1.213114 | 0.343406  |
| C | 1.891269 | 1.976388 | -1.722222 |
| C | 3.446023 | 2.454110 | 0.520506  |
| H | 3.052690 | 0.422565 | 1.063424  |
| C | 2.489929 | 3.216317 | -1.545643 |
| H | 1.296279 | 1.808844 | -2.617597 |
| C | 3.270704 | 3.466314 | -0.420427 |
| H | 4.072884 | 2.625063 | 1.394220  |
| H | 2.353893 | 3.989086 | -2.301482 |
| H | 3.751163 | 4.433912 | -0.286790 |

## G

$E = -1322.6034817\text{au}$

|    |           |           |           |
|----|-----------|-----------|-----------|
| N  | -0.631672 | -1.089241 | 1.044494  |
| C  | -3.334310 | -0.948136 | -1.134495 |
| C  | -3.760999 | -0.420493 | 0.134141  |
| C  | -3.613978 | 1.027166  | 0.083153  |
| C  | -3.072804 | 1.370794  | -1.181324 |
| C  | -2.857554 | 0.155477  | -1.918769 |
| Rh | -1.674565 | -0.038960 | -0.068158 |
| C  | 3.002049  | -0.134665 | -0.444763 |
| C  | 2.137343  | -1.077467 | -1.212258 |
| H  | 1.230537  | -1.347010 | -0.650875 |
| C  | -3.986166 | 1.955217  | 1.187526  |
| H  | -3.691161 | 1.548677  | 2.163367  |
| H  | -3.499584 | 2.932171  | 1.077847  |
| H  | -5.072654 | 2.127973  | 1.216159  |
| C  | -2.678353 | 2.728254  | -1.656000 |
| H  | -1.627748 | 2.748052  | -1.976476 |
| H  | -3.290439 | 3.049733  | -2.511528 |
| H  | -2.794178 | 3.481621  | -0.867387 |
| C  | -2.248995 | 0.083089  | -3.276328 |
| H  | -2.994531 | 0.267455  | -4.064770 |
| H  | -1.453477 | 0.831280  | -3.389456 |
| H  | -1.800997 | -0.900419 | -3.462372 |
| C  | -3.381360 | -2.388248 | -1.506630 |
| H  | -4.417481 | -2.705006 | -1.702234 |
| H  | -2.794036 | -2.592564 | -2.409313 |
| H  | -2.973467 | -3.001248 | -0.691619 |
| C  | -4.402316 | -1.212419 | 1.218262  |
| H  | -5.433075 | -1.487996 | 0.948501  |
| H  | -3.842985 | -2.140823 | 1.403432  |
| H  | -4.446352 | -0.645236 | 2.156596  |
| C  | 1.092573  | 1.334649  | 0.153070  |

|   |           |           |           |   |           |           |           |
|---|-----------|-----------|-----------|---|-----------|-----------|-----------|
| C | 2.514337  | 0.952600  | 0.259457  | H | 2.428900  | 2.969219  | -1.019627 |
| C | 0.602633  | 2.337642  | 1.070163  | H | 3.540766  | 2.427283  | -2.294359 |
| C | 3.339220  | 1.676877  | 1.200627  | C | 3.561248  | 2.122726  | 1.351415  |
| C | 1.435734  | 2.973314  | 1.931727  | H | 3.923524  | 1.873384  | 2.355113  |
| H | -0.461614 | 2.566756  | 1.008000  | H | 4.262302  | 2.850872  | 0.920231  |
| C | 2.827601  | 2.642790  | 2.002428  | H | 2.583859  | 2.614144  | 1.462876  |
| H | 4.383075  | 1.390174  | 1.303477  | C | 3.932887  | -0.929576 | 2.261298  |
| H | 1.043400  | 3.744565  | 2.594448  | H | 5.021548  | -1.059871 | 2.352831  |
| H | 3.461612  | 3.147723  | 2.727996  | H | 3.612294  | -0.226380 | 3.038769  |
| C | -1.045661 | -1.987793 | 3.255377  | H | 3.464549  | -1.896747 | 2.479087  |
| H | -1.965293 | -1.509658 | 3.622839  | C | 3.396758  | -2.784856 | -0.304123 |
| H | -0.972463 | -2.978571 | 3.717852  | H | 4.317189  | -3.063752 | -0.838968 |
| H | -0.198808 | -1.361390 | 3.554771  | H | 3.443619  | -3.238308 | 0.693206  |
| O | 0.351703  | 0.841013  | -0.724519 | H | 2.543046  | -3.220603 | -0.841147 |
| C | -1.150264 | -2.130753 | 1.747374  | C | 2.618554  | -0.910022 | -2.718893 |
| O | -1.683399 | -3.134099 | 1.258713  | H | 1.896551  | -1.737241 | -2.681446 |
| H | 2.699451  | -1.972080 | -1.500615 | H | 2.185096  | -0.100479 | -3.317874 |
| C | 4.447444  | -0.432186 | -0.468842 | H | 3.530293  | -1.254405 | -3.230734 |
| C | 5.375167  | 0.548276  | -0.847004 | C | -0.748342 | 2.172722  | 0.416243  |
| C | 4.914696  | -1.719708 | -0.170207 | C | -2.117519 | 1.687235  | 0.308538  |
| C | 6.729971  | 0.250114  | -0.920609 | C | -0.492078 | 3.481639  | -0.104489 |
| H | 5.018747  | 1.543197  | -1.111457 | C | -3.073718 | 2.486210  | -0.387180 |
| C | 6.271934  | -2.006892 | -0.215333 | C | -1.456356 | 4.218892  | -0.739156 |
| H | 4.205902  | -2.491065 | 0.129188  | H | 0.521623  | 3.862241  | 0.017215  |
| C | 7.182904  | -1.025194 | -0.596888 | C | -2.768927 | 3.719931  | -0.895488 |
| H | 7.434869  | 1.017813  | -1.234860 | H | -4.095159 | 2.116324  | -0.459130 |
| H | 6.620404  | -3.005175 | 0.043075  | H | -1.207660 | 5.205786  | -1.130240 |
| H | 8.245425  | -1.256528 | -0.646495 | H | -3.530549 | 4.318001  | -1.390685 |
| H | 1.772540  | -0.593696 | -2.129139 | C | -1.183726 | -3.404431 | 0.242107  |

### TS<sub>G-H</sub>

E = -1322.5955045au

|    |           |           |           |   |           |           |           |
|----|-----------|-----------|-----------|---|-----------|-----------|-----------|
| N  | -0.062414 | -1.266883 | 0.098646  | O | 0.211383  | 1.499659  | 0.914971  |
| C  | 3.260575  | -1.305684 | -0.232858 | C | -0.172848 | -2.504206 | -0.450421 |
| C  | 2.939439  | -0.452218 | -1.340452 | O | 0.422384  | -2.899821 | -1.459865 |
| C  | 3.006139  | 0.912989  | -0.869193 | H | -2.350986 | -0.949212 | 2.499768  |
| C  | 3.441373  | 0.909121  | 0.493725  | C | -3.745775 | -0.211575 | 0.445155  |
| C  | 3.562879  | -0.447807 | 0.902592  | C | -4.706882 | -0.727297 | 1.323036  |
| Rh | 1.487011  | -0.197148 | 0.222157  | C | -3.865251 | -0.483733 | -0.925399 |
| C  | -2.549476 | 0.494587  | 0.942283  | C | -5.774923 | -1.472914 | 0.841200  |
| C  | -1.795630 | -0.190317 | 1.940287  | H | -4.620647 | -0.520623 | 2.389324  |
| H  | -1.034584 | -0.791876 | 1.197014  | C | -4.919064 | -1.253617 | -1.401330 |
| C  | 2.686614  | 2.125046  | -1.670040 | H | -3.095845 | -0.118172 | -1.604285 |
| H  | 1.830414  | 1.949058  | -2.333431 | C | -5.879438 | -1.743329 | -0.520775 |

|   |           |           |           |
|---|-----------|-----------|-----------|
| H | -6.524812 | -1.852988 | 1.532843  |
| H | -4.986300 | -1.477348 | -2.464436 |
| H | -6.708063 | -2.342202 | -0.894988 |
| H | -1.107530 | 0.411642  | 2.537747  |

## H

E = -1322.6662246au

|    |           |           |           |
|----|-----------|-----------|-----------|
| N  | 1.580420  | 1.585553  | -0.328938 |
| C  | 2.322601  | -1.724581 | -0.809361 |
| C  | 2.765415  | -1.566504 | 0.531565  |
| C  | 1.655765  | -1.930730 | 1.410901  |
| C  | 0.559237  | -2.359299 | 0.611286  |
| C  | 0.941744  | -2.167154 | -0.758432 |
| Rh | 1.072856  | -0.258089 | 0.206812  |
| C  | -2.243867 | 0.896752  | -1.150462 |
| C  | -1.832933 | 1.031120  | -2.421558 |
| C  | 1.646697  | -1.857506 | 2.895063  |
| H  | 2.380337  | -1.133688 | 3.267879  |
| H  | 0.659065  | -1.548810 | 3.258868  |
| H  | 1.882981  | -2.836278 | 3.338377  |
| C  | -0.786699 | -2.738511 | 1.126120  |
| H  | -1.417808 | -3.169630 | 0.340415  |
| H  | -0.701870 | -3.477234 | 1.933993  |
| H  | -1.311209 | -1.853748 | 1.519494  |
| C  | 0.078818  | -2.399621 | -1.943193 |
| H  | 0.249054  | -3.406055 | -2.354402 |
| H  | -0.983143 | -2.308445 | -1.684457 |
| H  | 0.296826  | -1.672269 | -2.734560 |
| C  | 3.136630  | -1.516786 | -2.035962 |
| H  | 3.716990  | -2.421142 | -2.272786 |
| H  | 2.503424  | -1.292890 | -2.902958 |
| H  | 3.821601  | -0.672632 | -1.901173 |
| C  | 4.119906  | -1.124035 | 0.947748  |
| H  | 4.417837  | -0.249217 | 0.355461  |
| H  | 4.149772  | -0.851955 | 2.008834  |
| H  | 4.854686  | -1.926057 | 0.784258  |
| C  | -1.063395 | 1.719564  | 0.921889  |
| C  | -1.905054 | 1.978369  | -0.188993 |
| C  | -0.727432 | 2.790533  | 1.769586  |
| C  | -2.378385 | 3.273825  | -0.402939 |
| C  | -1.215373 | 4.070896  | 1.539890  |
| H  | -0.058948 | 2.578548  | 2.604059  |
| C  | -2.044244 | 4.322186  | 0.449109  |
| H  | -3.027409 | 3.451204  | -1.261357 |

|   |           |           |           |
|---|-----------|-----------|-----------|
| H | -0.939382 | 4.881245  | 2.214274  |
| H | -2.428867 | 5.323401  | 0.263915  |
| C | 2.784581  | 3.554828  | -1.101347 |
| H | 3.817502  | 3.914292  | -1.077387 |
| H | 2.387558  | 3.726336  | -2.110781 |
| H | 2.172386  | 4.137594  | -0.401455 |
| O | -0.586541 | 0.505668  | 1.141271  |
| C | 2.759930  | 2.067859  | -0.797047 |
| O | 3.759863  | 1.377998  | -0.998439 |
| H | -2.084901 | 0.324180  | -3.210860 |
| C | -3.067449 | -0.246607 | -0.686824 |
| C | -3.334512 | -1.352541 | -1.507422 |
| C | -3.633534 | -0.241545 | 0.594370  |
| C | -4.115749 | -2.411933 | -1.063525 |
| H | -2.926686 | -1.389934 | -2.517124 |
| C | -4.417936 | -1.298967 | 1.041353  |
| H | -3.455638 | 0.610636  | 1.247345  |
| C | -4.660488 | -2.393207 | 0.218303  |
| H | -4.305883 | -3.254890 | -1.726850 |
| H | -4.844566 | -1.262836 | 2.042762  |
| H | -5.274201 | -3.222123 | 0.567279  |
| H | -1.220318 | 1.883020  | -2.712199 |
| H | 0.877103  | 2.306744  | -0.166199 |

## H1

E = -1551.6497857au

|    |           |           |           |
|----|-----------|-----------|-----------|
| N  | -0.143214 | -0.303948 | 1.630431  |
| C  | -2.460352 | -1.824473 | -0.039464 |
| C  | -3.244486 | -0.663402 | -0.301798 |
| C  | -2.832153 | -0.126227 | -1.592216 |
| C  | -1.779520 | -0.933671 | -2.096421 |
| C  | -1.480602 | -1.946890 | -1.096720 |
| Rh | -1.162016 | -0.080198 | -0.192658 |
| C  | 3.091389  | 0.301220  | 0.728912  |
| C  | 3.497915  | 0.508646  | 1.993714  |
| H  | 3.424580  | 1.493637  | 2.451996  |
| C  | -3.398936 | 1.105947  | -2.203157 |
| H  | -2.870834 | 1.378688  | -3.123521 |
| H  | -4.462703 | 0.971693  | -2.444637 |
| H  | -3.312299 | 1.950936  | -1.506901 |
| C  | -0.979329 | -0.729395 | -3.331459 |
| H  | -0.990162 | -1.631263 | -3.958991 |
| H  | -1.357317 | 0.106621  | -3.930467 |
| H  | 0.063557  | -0.509216 | -3.056130 |

|   |           |           |           |
|---|-----------|-----------|-----------|
| C | -0.390963 | -2.953913 | -1.202508 |
| H | -0.666510 | -3.784382 | -1.869320 |
| H | 0.527413  | -2.489831 | -1.588550 |
| H | -0.142673 | -3.373942 | -0.219433 |
| C | -2.622332 | -2.736005 | 1.121627  |
| H | -3.422894 | -3.460922 | 0.913862  |
| H | -1.706343 | -3.305999 | 1.320067  |
| H | -2.883065 | -2.180315 | 2.029228  |
| C | -4.306801 | -0.114735 | 0.583306  |
| H | -5.253376 | -0.662282 | 0.462954  |
| H | -3.991434 | -0.178756 | 1.632993  |
| H | -4.497126 | 0.941309  | 0.357754  |
| C | 1.447546  | 1.341305  | -0.879568 |
| C | 2.628537  | 1.442957  | -0.093520 |
| C | 1.025114  | 2.480715  | -1.595441 |
| C | 3.319680  | 2.657754  | -0.056497 |
| C | 1.724253  | 3.676594  | -1.533334 |
| H | 0.113111  | 2.388294  | -2.188797 |
| C | 2.878913  | 3.775056  | -0.755814 |
| H | 4.235915  | 2.712656  | 0.532500  |
| H | 1.373697  | 4.538419  | -2.102450 |
| H | 3.441558  | 4.706011  | -0.713468 |
| C | 0.071824  | -1.473139 | 3.758349  |
| H | 0.244429  | -2.479594 | 3.348643  |
| H | 1.056206  | -1.010910 | 3.914039  |
| H | -0.446529 | -1.563042 | 4.717233  |
| O | 0.787279  | 0.205914  | -0.949606 |
| C | -0.767217 | -0.664972 | 2.786302  |
| O | -1.926335 | -0.351645 | 3.049604  |
| H | 0.777265  | -0.721506 | 1.493869  |
| H | 3.930828  | -0.286753 | 2.599045  |
| C | 3.131177  | -1.061046 | 0.142549  |
| C | 3.400604  | -1.252040 | -1.218241 |
| C | 2.916380  | -2.195112 | 0.935280  |
| C | 3.472554  | -2.528440 | -1.759602 |
| H | 3.557662  | -0.379723 | -1.851886 |
| C | 2.984508  | -3.475545 | 0.395222  |
| H | 2.683815  | -2.070718 | 1.994374  |
| C | 3.265477  | -3.648723 | -0.956041 |
| H | 3.694811  | -2.651852 | -2.818941 |
| H | 2.814843  | -4.341062 | 1.034829  |
| H | 3.322226  | -4.648893 | -1.383159 |
| C | -0.809443 | 2.812404  | 1.020403  |
| O | -1.470384 | 2.110771  | 0.244698  |

|   |           |          |          |
|---|-----------|----------|----------|
| O | 0.040712  | 2.345189 | 1.885645 |
| H | 0.055058  | 1.323297 | 1.810894 |
| C | -0.908143 | 4.302481 | 1.005754 |
| H | -1.006744 | 4.690289 | 2.024930 |
| H | 0.029515  | 4.693507 | 0.587950 |
| H | -1.746980 | 4.626228 | 0.385648 |

**TS<sub>H1-I</sub>**

**E = -1551.6477376au**

|    |           |           |           |
|----|-----------|-----------|-----------|
| N  | -0.109207 | -0.235726 | 1.691256  |
| C  | -2.516038 | -1.773655 | -0.093575 |
| C  | -3.243990 | -0.588334 | -0.405663 |
| C  | -2.731093 | -0.066875 | -1.662703 |
| C  | -1.679964 | -0.926501 | -2.103728 |
| C  | -1.486208 | -1.945945 | -1.093750 |
| Rh | -1.154254 | -0.050322 | -0.199073 |
| C  | 3.096962  | 0.330003  | 0.779417  |
| C  | 3.471096  | 0.508965  | 2.058259  |
| H  | 3.370457  | 1.480257  | 2.539261  |
| C  | -3.209006 | 1.184774  | -2.308596 |
| H  | -4.271196 | 1.108199  | -2.579592 |
| H  | -3.090015 | 2.032360  | -1.619663 |
| H  | -2.641334 | 1.413863  | -3.217373 |
| C  | -0.802103 | -0.763946 | -3.290454 |
| H  | -0.829872 | -1.663179 | -3.921180 |
| H  | -1.096984 | 0.094647  | -3.903751 |
| H  | 0.233971  | -0.601083 | -2.955276 |
| C  | -0.439537 | -3.002618 | -1.139054 |
| H  | -0.715856 | -3.822735 | -1.818318 |
| H  | 0.520428  | -2.586912 | -1.477005 |
| H  | -0.268127 | -3.433875 | -0.144383 |
| C  | -2.786550 | -2.668602 | 1.061035  |
| H  | -3.642815 | -3.318291 | 0.828078  |
| H  | -1.931520 | -3.319547 | 1.281705  |
| H  | -3.025506 | -2.102321 | 1.969414  |
| C  | -4.333680 | 0.003908  | 0.416218  |
| H  | -5.287585 | -0.521490 | 0.260789  |
| H  | -4.077986 | -0.048958 | 1.482358  |
| H  | -4.484676 | 1.060046  | 0.165595  |
| C  | 1.451022  | 1.388737  | -0.809488 |
| C  | 2.628103  | 1.485221  | -0.020768 |
| C  | 1.014554  | 2.531325  | -1.507624 |
| C  | 3.307691  | 2.705037  | 0.038741  |
| C  | 1.701139  | 3.732558  | -1.421885 |

|   |           |           |           |   |           |           |           |
|---|-----------|-----------|-----------|---|-----------|-----------|-----------|
| H | 0.097240  | 2.439667  | -2.092934 | H | 1.284802  | 0.049819  | 2.718515  |
| C | 2.854929  | 3.827884  | -0.643246 | C | -2.816905 | 1.953804  | -1.872954 |
| H | 4.221456  | 2.759215  | 0.631700  | H | -1.873508 | 1.835391  | -2.423399 |
| H | 1.338679  | 4.603503  | -1.968511 | H | -3.631460 | 2.010125  | -2.609586 |
| H | 3.404797  | 4.765350  | -0.581150 | H | -2.768318 | 2.915512  | -1.351480 |
| C | -0.068180 | -1.990693 | 3.404284  | C | -2.880876 | -1.033238 | -2.742535 |
| H | 0.838390  | -1.629086 | 3.909677  | H | -3.689784 | -0.700604 | -3.408665 |
| H | -0.723912 | -2.467264 | 4.138567  | H | -1.936955 | -0.625536 | -3.127713 |
| H | 0.254469  | -2.728117 | 2.654127  | H | -2.817074 | -2.124890 | -2.805172 |
| O | 0.802880  | 0.243679  | -0.894317 | C | -3.499543 | -2.846333 | -0.121947 |
| C | -0.784331 | -0.838610 | 2.740135  | H | -4.508931 | -3.143423 | 0.195763  |
| O | -1.886614 | -0.458177 | 3.099179  | H | -3.295088 | -3.320791 | -1.087959 |
| H | 0.805715  | -0.642899 | 1.491517  | H | -2.781973 | -3.253264 | 0.602590  |
| H | 3.903743  | -0.295142 | 2.652523  | C | -3.650092 | -0.894150 | 2.351686  |
| C | 3.161370  | -1.015148 | 0.155767  | H | -4.718859 | -1.041613 | 2.567707  |
| C | 3.423366  | -1.163331 | -1.211899 | H | -3.132418 | -1.839864 | 2.556155  |
| C | 2.961742  | -2.175246 | 0.914120  | H | -3.259963 | -0.145548 | 3.051030  |
| C | 3.495175  | -2.421685 | -1.793664 | C | -3.291167 | 2.075425  | 1.356737  |
| H | 3.571553  | -0.271197 | -1.819462 | H | -4.151190 | 2.064900  | 2.038649  |
| C | 3.029590  | -3.438156 | 0.334007  | H | -2.368430 | 2.092263  | 1.955758  |
| H | 2.741035  | -2.084855 | 1.979059  | H | -3.332082 | 3.005606  | 0.778908  |
| C | 3.296923  | -3.567851 | -1.024817 | C | 0.570262  | 1.733868  | 0.579967  |
| H | 3.709571  | -2.510748 | -2.858025 | C | 1.979655  | 1.532568  | 0.529000  |
| H | 2.868845  | -4.323868 | 0.948149  | C | 0.052004  | 2.908594  | -0.003580 |
| H | 3.351746  | -4.553973 | -1.483659 | C | 2.772759  | 2.518741  | -0.074065 |
| C | -0.829263 | 2.724628  | 1.112088  | C | 0.860378  | 3.863303  | -0.596569 |
| O | -1.456400 | 2.063280  | 0.239106  | H | -1.025868 | 3.057351  | 0.053735  |
| O | -0.036423 | 2.233420  | 1.967172  | C | 2.239602  | 3.671727  | -0.632206 |
| H | -0.027775 | 0.986016  | 1.854406  | H | 3.852317  | 2.370056  | -0.097552 |
| C | -1.057248 | 4.209559  | 1.165956  | H | 0.417064  | 4.763749  | -1.022332 |
| H | -1.802965 | 4.428210  | 1.940853  | H | 2.894625  | 4.414082  | -1.084862 |
| H | -0.127840 | 4.717154  | 1.442136  | O | -0.243622 | 0.887846  | 1.194825  |
| H | -1.426632 | 4.581585  | 0.206053  | C | 0.458215  | -1.885061 | -0.267453 |

## I

$$E = -1342.5431552\text{au}$$

|    |           |           |           |   |          |           |           |
|----|-----------|-----------|-----------|---|----------|-----------|-----------|
| C  | -3.439983 | -0.470541 | 0.942088  | C | 1.622037 | -2.808557 | -0.441686 |
| C  | -3.301425 | 0.876684  | 0.475021  | H | 1.959587 | -2.821477 | -1.482586 |
| C  | -3.035807 | 0.820872  | -0.932702 | H | 2.455003 | -2.456181 | 0.181351  |
| C  | -3.117164 | -0.572555 | -1.348708 | H | 1.352354 | -3.816758 | -0.110422 |
| C  | -3.383759 | -1.365903 | -0.204206 | H | 2.670863 | -1.184450 | 2.577525  |
| Rh | -1.507749 | -0.307395 | 0.077854  | C | 3.844003 | -0.187200 | 0.421128  |
| C  | 2.635976  | 0.340713  | 1.106346  | C | 3.889431 | -0.285745 | -0.976566 |
| C  | 2.177756  | -0.287426 | 2.202456  | C | 4.938000 | -0.662900 | 1.152831  |
|    |           |           |           | C | 4.979459 | -0.863438 | -1.614818 |

|   |          |           |           |
|---|----------|-----------|-----------|
| H | 3.038947 | 0.071489  | -1.556885 |
| C | 6.031991 | -1.237403 | 0.514291  |
| H | 4.927038 | -0.563433 | 2.238053  |
| C | 6.056222 | -1.343122 | -0.872423 |
| H | 4.987750 | -0.942736 | -2.701267 |
| H | 6.875111 | -1.594404 | 1.104511  |
| H | 6.912786 | -1.791510 | -1.373796 |

## I1

E = -1571.5142467au

|    |           |           |           |
|----|-----------|-----------|-----------|
| C  | -3.265925 | -0.567877 | 0.661631  |
| C  | -3.174375 | 0.824618  | 0.379665  |
| C  | -2.786812 | 0.974073  | -1.007998 |
| C  | -2.777327 | -0.346501 | -1.609794 |
| C  | -3.037744 | -1.292621 | -0.579072 |
| Rh | -1.268316 | -0.132954 | -0.053696 |
| C  | 2.632788  | 0.527796  | 1.353664  |
| C  | 2.589015  | 0.216887  | 2.657020  |
| H  | 2.097143  | 0.878953  | 3.367165  |
| C  | -2.520308 | 2.232902  | -1.754244 |
| H  | -1.556215 | 2.165007  | -2.276887 |
| H  | -3.305359 | 2.421223  | -2.500911 |
| H  | -2.467469 | 3.099717  | -1.086117 |
| C  | -2.515431 | -0.606520 | -3.050713 |
| H  | -3.340156 | -0.207246 | -3.658601 |
| H  | -1.590129 | -0.123137 | -3.393845 |
| H  | -2.429332 | -1.677257 | -3.265534 |
| C  | -3.069271 | -2.775166 | -0.695710 |
| H  | -4.073093 | -3.159852 | -0.466291 |
| H  | -2.799149 | -3.112001 | -1.702076 |
| H  | -2.364585 | -3.236665 | 0.009146  |
| C  | -3.604275 | -1.172049 | 1.980112  |
| H  | -4.693133 | -1.217200 | 2.131201  |
| H  | -3.219829 | -2.196523 | 2.061059  |
| H  | -3.173463 | -0.591078 | 2.805265  |
| C  | -3.316639 | 1.905423  | 1.391206  |
| H  | -4.207934 | 1.740879  | 2.010277  |
| H  | -2.433326 | 1.924890  | 2.047268  |
| H  | -3.406906 | 2.891184  | 0.921137  |
| C  | 0.616288  | 2.020717  | 0.970803  |
| C  | 2.011117  | 1.811134  | 0.924685  |
| C  | 0.114235  | 3.278220  | 0.597220  |
| C  | 2.836865  | 2.861061  | 0.514455  |
| C  | 0.949959  | 4.305650  | 0.192538  |

|   |           |           |           |
|---|-----------|-----------|-----------|
| H | -0.965187 | 3.424321  | 0.653234  |
| C | 2.326743  | 4.099617  | 0.147809  |
| H | 3.913389  | 2.686702  | 0.485275  |
| H | 0.528679  | 5.271087  | -0.085824 |
| H | 2.997519  | 4.897214  | -0.166103 |
| O | -0.254416 | 1.084788  | 1.376486  |
| C | 0.669372  | -0.422816 | -2.340835 |
| O | 0.285343  | 0.316535  | -1.334317 |
| O | 1.029036  | 0.067033  | -3.404272 |
| C | 0.721684  | -1.922685 | -2.126011 |
| H | 0.932719  | -2.424900 | -3.075460 |
| H | 1.527010  | -2.145340 | -1.412596 |
| H | -0.201163 | -2.317033 | -1.682651 |
| C | 0.051219  | -1.922765 | 2.111954  |
| O | -0.159359 | -1.857692 | 0.895485  |
| O | -0.065687 | -0.920915 | 2.934947  |
| H | -0.088217 | -0.047502 | 2.386026  |
| C | 0.489873  | -3.200375 | 2.752262  |
| H | 1.580600  | -3.167184 | 2.872174  |
| H | 0.051943  | -3.302103 | 3.750335  |
| H | 0.235378  | -4.056368 | 2.122653  |
| H | 3.026269  | -0.687827 | 3.077279  |
| C | 3.320882  | -0.306093 | 0.337327  |
| C | 3.332077  | 0.075245  | -1.010158 |
| C | 3.983747  | -1.494683 | 0.681991  |
| C | 3.972674  | -0.697708 | -1.973833 |
| H | 2.803746  | 0.974753  | -1.317060 |
| C | 4.626009  | -2.265204 | -0.276454 |
| H | 4.019510  | -1.819470 | 1.721224  |
| C | 4.624588  | -1.870431 | -1.613315 |
| H | 3.927484  | -0.384065 | -3.015280 |
| H | 5.136808  | -3.179803 | 0.023031  |
| H | 5.125188  | -2.477526 | -2.366065 |

## TS<sub>H-A</sub>

E = -1571.5169503au

|    |           |           |           |
|----|-----------|-----------|-----------|
| C  | 2.867887  | -0.499539 | -1.433047 |
| C  | 2.813793  | 0.909550  | -1.243776 |
| C  | 3.000935  | 1.182227  | 0.166554  |
| C  | 3.264596  | -0.074205 | 0.826195  |
| C  | 3.150464  | -1.113970 | -0.146488 |
| Rh | 1.277989  | -0.064066 | -0.032527 |
| C  | -3.284484 | 0.805393  | -0.944856 |
| C  | -4.066210 | 0.963750  | -2.022543 |

|   |           |           |           |
|---|-----------|-----------|-----------|
| H | -4.048683 | 1.891716  | -2.591257 |
| C | 3.065457  | 2.504044  | 0.847945  |
| H | 2.320389  | 2.565463  | 1.653325  |
| H | 4.057950  | 2.658621  | 1.295200  |
| H | 2.881506  | 3.332205  | 0.154689  |
| C | 3.574381  | -0.191593 | 2.275214  |
| H | 4.554955  | 0.257942  | 2.488813  |
| H | 2.824473  | 0.339900  | 2.875643  |
| H | 3.604010  | -1.233168 | 2.611893  |
| C | 3.262035  | -2.580745 | 0.072611  |
| H | 4.075407  | -3.002867 | -0.533864 |
| H | 3.460495  | -2.821856 | 1.122237  |
| H | 2.325848  | -3.081226 | -0.214112 |
| C | 2.693175  | -1.224591 | -2.721162 |
| H | 3.644975  | -1.301461 | -3.267341 |
| H | 2.328810  | -2.244923 | -2.549132 |
| H | 1.971588  | -0.715820 | -3.372238 |
| C | 2.488996  | 1.897478  | -2.307626 |
| H | 3.073364  | 1.696991  | -3.214619 |
| H | 1.421016  | 1.840027  | -2.564883 |
| H | 2.697508  | 2.924190  | -1.987288 |
| C | -1.067545 | 1.984142  | -0.521706 |
| C | -2.474321 | 1.962339  | -0.479500 |
| C | -0.393133 | 3.125639  | -0.074805 |
| C | -3.145778 | 3.094037  | -0.005395 |
| C | -1.078185 | 4.229222  | 0.407633  |
| H | 0.694049  | 3.123185  | -0.122373 |
| C | -2.469137 | 4.221048  | 0.442151  |
| H | -4.234991 | 3.062714  | 0.017724  |
| H | -0.523331 | 5.100655  | 0.753140  |
| H | -3.021495 | 5.080051  | 0.817992  |
| O | -0.341682 | 0.977967  | -1.051562 |
| C | -0.062210 | -0.419064 | 2.701193  |
| O | 0.244788  | 0.360166  | 1.697448  |
| O | -0.701036 | -0.005200 | 3.658060  |
| C | 0.389138  | -1.865174 | 2.639199  |
| H | 0.074246  | -2.383646 | 3.550116  |
| H | -0.041616 | -2.358333 | 1.759295  |
| H | 1.482107  | -1.934799 | 2.549339  |
| C | -0.617186 | -1.980719 | -1.503647 |
| O | 0.118646  | -1.880331 | -0.491224 |
| O | -1.023358 | -1.001224 | -2.213627 |
| H | -0.807123 | 0.003760  | -1.680986 |
| C | -0.996017 | -3.356816 | -1.967271 |

|   |           |           |           |
|---|-----------|-----------|-----------|
| H | -1.081144 | -4.033063 | -1.111872 |
| H | -1.932150 | -3.331087 | -2.531670 |
| H | -0.204550 | -3.736862 | -2.627927 |
| H | -4.754224 | 0.192274  | -2.364644 |
| C | -3.282679 | -0.436120 | -0.140396 |
| C | -2.877517 | -0.417251 | 1.198153  |
| C | -3.715027 | -1.654085 | -0.686211 |
| C | -2.928381 | -1.572422 | 1.974596  |
| H | -2.507456 | 0.505558  | 1.644091  |
| C | -3.763258 | -2.805498 | 0.085374  |
| H | -3.983879 | -1.698970 | -1.741755 |
| C | -3.372022 | -2.769154 | 1.423793  |
| H | -2.599234 | -1.518337 | 3.011547  |
| H | -4.099638 | -3.741315 | -0.361786 |
| H | -3.408120 | -3.673109 | 2.030581  |

## 2a

$$E = -615.4451672\text{au}$$

|   |           |           |           |
|---|-----------|-----------|-----------|
| C | 2.232347  | 0.591901  | -0.440922 |
| C | 3.378973  | -0.202628 | -0.488666 |
| C | 1.106237  | 0.166432  | 0.288619  |
| C | 3.421365  | -1.411027 | 0.188317  |
| C | 1.168880  | -1.071994 | 0.939792  |
| C | 2.312518  | -1.854958 | 0.908170  |
| H | 4.325918  | -2.016043 | 0.149290  |
| H | 0.290224  | -1.407755 | 1.491031  |
| H | 2.340033  | -2.805427 | 1.436952  |
| O | 2.264670  | 1.750145  | -1.139675 |
| H | 1.391078  | 2.173802  | -1.067763 |
| H | 4.225368  | 0.157145  | -1.070201 |
| C | -0.123975 | 0.990238  | 0.361438  |
| C | -0.071179 | 2.303489  | 0.653341  |
| H | 0.862811  | 2.788044  | 0.936552  |
| H | -0.966765 | 2.922476  | 0.655393  |
| C | -1.420414 | 0.325311  | 0.094191  |
| C | -1.522465 | -0.675972 | -0.879262 |
| C | -2.573245 | 0.692970  | 0.797562  |
| C | -2.746397 | -1.269818 | -1.160458 |
| H | -0.629775 | -0.979367 | -1.425439 |
| C | -3.795830 | 0.093075  | 0.522533  |
| H | -2.497748 | 1.440097  | 1.587151  |
| C | -3.887467 | -0.887296 | -0.461089 |
| H | -2.809873 | -2.037622 | -1.929854 |
| H | -4.679774 | 0.384678  | 1.087668  |



H -4.844948 -1.359529 -0.674767

### TS<sub>G-J</sub>

E = -1322.5781049au

N -0.680485 -0.988579 1.231449  
C -3.316428 -1.041107 -1.048323  
C -3.731734 -0.286871 0.106053  
C -3.469538 1.118994 -0.168782  
C -2.878607 1.213131 -1.455057  
C -2.749389 -0.115279 -1.985489  
Rh -1.620855 -0.094338 -0.079904  
C 2.909288 -0.395309 -0.116803  
C 1.978670 -1.272035 -0.704800  
H 1.196043 -0.343973 -1.163519  
C -3.783848 2.237833 0.762900  
H -3.585133 1.953021 1.803985  
H -3.178629 3.126296 0.546618  
H -4.842509 2.530682 0.695354  
C -2.352265 2.437550 -2.122470  
H -1.296802 2.304878 -2.398957  
H -2.911848 2.671928 -3.039850  
H -2.413324 3.314449 -1.466346  
C -2.135790 -0.449249 -3.300583  
H -2.854899 -0.317832 -4.123417  
H -1.273387 0.196399 -3.511241  
H -1.784304 -1.487602 -3.327426  
C -3.454290 -2.517248 -1.185287  
H -4.509667 -2.800344 -1.318223  
H -2.896467 -2.896538 -2.049442  
H -3.069013 -3.017131 -0.286344  
C -4.459601 -0.851483 1.274862  
H -5.494319 -1.109369 1.002669  
H -3.970501 -1.768558 1.637100  
H -4.505423 -0.135795 2.105029  
C 1.200084 1.364539 0.005784  
C 2.417790 0.794991 0.518648  
C 0.852027 2.668687 0.419871  
C 3.162466 1.522015 1.474070  
C 1.585232 3.325760 1.382921  
H -0.058655 3.096175 0.001346  
C 2.747639 2.752904 1.927836  
H 4.065289 1.066226 1.879747  
H 1.252424 4.302634 1.732470  
H 3.310776 3.276931 2.696703

C -1.273607 -1.351970 3.547803  
H -0.313729 -0.884854 3.793911  
H -2.053237 -0.588820 3.688457  
H -1.479753 -2.190392 4.221757  
O 0.454111 0.738779 -0.867179  
C -1.314050 -1.820483 2.105795  
O -1.903154 -2.861652 1.798350  
H 1.125620 -1.566075 -0.071385  
C 4.348893 -0.599022 -0.323680  
C 5.231746 0.470989 -0.534710  
C 4.860436 -1.905671 -0.341082  
C 6.581322 0.237750 -0.761335  
H 4.843173 1.487703 -0.551918  
C 6.212597 -2.135522 -0.549615  
H 4.186163 -2.740235 -0.155403  
C 7.075335 -1.064011 -0.765548  
H 7.251352 1.076106 -0.942692  
H 6.596078 -3.154085 -0.542738  
H 8.135059 -1.244094 -0.938636  
H 2.357539 -2.048779 -1.369341

### J

E = -707.1498705au

Rh 0.102976 0.002836 -0.632701  
C -0.619786 0.700437 1.269718  
C -1.568099 1.149533 0.270153  
C -2.187354 0.009260 -0.317743  
C -0.625928 -0.730561 1.252664  
C -1.581231 -1.149376 0.245548  
N 1.834249 0.008152 -1.066798  
C 2.991637 0.004107 -0.320502  
C 4.264363 0.010230 -1.128598  
H 4.295413 -0.866331 -1.787737  
H 4.294286 0.895465 -1.776105  
H 5.133948 0.006400 -0.464317  
O 2.995677 -0.004296 0.909452  
C -1.886900 -2.563872 -0.101761  
H -2.610794 -2.996180 0.605030  
H -2.314022 -2.648392 -1.107789  
H -0.984210 -3.186019 -0.073432  
C 0.190485 -1.598769 2.144012  
H -0.179264 -1.553304 3.179608  
H 0.161105 -2.647340 1.825896  
H 1.239577 -1.271429 2.139276

|   |           |           |           |
|---|-----------|-----------|-----------|
| C | 0.202799  | 1.541325  | 2.181348  |
| H | 1.250919  | 1.211295  | 2.163612  |
| H | 0.175017  | 2.598259  | 1.892053  |
| H | -0.163758 | 1.468353  | 3.216514  |
| C | -1.866662 | 2.572655  | -0.046874 |
| H | -2.287008 | 2.681804  | -1.053426 |
| H | -2.595246 | 2.989913  | 0.664348  |
| H | -0.963138 | 3.192179  | 0.003098  |
| C | -3.215143 | 0.032198  | -1.397093 |
| H | -4.227656 | 0.162409  | -0.987567 |
| H | -3.040650 | 0.850146  | -2.107195 |
| H | -3.212697 | -0.900536 | -1.973582 |

|   |          |           |           |
|---|----------|-----------|-----------|
| C | 0.682212 | -3.242584 | -0.065803 |
| H | 0.684483 | -3.796354 | -1.011600 |
| H | 1.658794 | -2.743821 | 0.043189  |
| H | 0.572129 | -3.972622 | 0.745636  |
| C | 3.134724 | 0.339690  | -0.011298 |
| O | 2.102156 | -0.447993 | 0.016038  |
| O | 3.126381 | 1.566890  | -0.056438 |
| H | 1.349662 | 2.110230  | -0.031198 |
| C | 4.444143 | -0.424892 | 0.016388  |
| H | 5.290400 | 0.267558  | 0.010760  |
| H | 4.489346 | -1.058779 | 0.910187  |
| H | 4.505897 | -1.090211 | -0.853441 |

### K

E = -936.1744781au

|    |           |           |           |
|----|-----------|-----------|-----------|
| Rh | 0.050819  | -0.061752 | -0.010811 |
| C  | -1.951600 | -0.581037 | -0.671730 |
| C  | -0.985522 | -1.560386 | -1.152458 |
| C  | -0.410279 | -2.230388 | -0.031338 |
| C  | -1.908363 | -0.601239 | 0.748375  |
| C  | -0.914287 | -1.593471 | 1.141376  |
| N  | 0.351517  | 1.866496  | -0.009328 |
| C  | -0.538749 | 2.893564  | 0.017526  |
| C  | 0.077562  | 4.276699  | -0.027390 |
| H  | 0.566072  | 4.438810  | -0.997049 |
| H  | -0.699766 | 5.032884  | 0.113125  |
| H  | 0.849547  | 4.390486  | 0.743777  |
| O  | -1.761057 | 2.747974  | 0.062830  |
| C  | -0.482750 | -1.906321 | 2.528500  |
| H  | -1.059038 | -2.748601 | 2.939503  |
| H  | 0.579538  | -2.179407 | 2.548451  |
| H  | -0.619202 | -1.048224 | 3.196096  |
| C  | -2.753377 | 0.219425  | 1.653722  |
| H  | -3.795086 | -0.133374 | 1.628451  |
| H  | -2.408248 | 0.165276  | 2.692402  |
| H  | -2.731801 | 1.269047  | 1.332018  |
| C  | -2.855416 | 0.255209  | -1.504256 |
| H  | -3.891694 | -0.105336 | -1.423833 |
| H  | -2.820285 | 1.298198  | -1.163073 |
| H  | -2.573962 | 0.224726  | -2.563021 |
| C  | -0.657928 | -1.822196 | -2.578039 |
| H  | -1.354364 | -2.554645 | -3.012629 |
| H  | -0.722074 | -0.904948 | -3.174930 |
| H  | 0.360117  | -2.214934 | -2.681938 |

### TS<sub>F-L</sub>

E = -1322.5542311au

|    |           |           |           |
|----|-----------|-----------|-----------|
| N  | 2.278155  | 0.279020  | -1.583670 |
| C  | 2.364570  | -1.550142 | 0.670912  |
| C  | 1.742114  | -0.810846 | 1.726749  |
| C  | 0.358660  | -1.235666 | 1.825306  |
| C  | 0.126809  | -2.185084 | 0.788407  |
| C  | 1.340554  | -2.304133 | 0.017375  |
| Rh | 0.704732  | -0.160069 | -0.082588 |
| C  | -1.394386 | 0.516754  | -0.828029 |
| C  | -0.469322 | 0.383922  | -1.966183 |
| H  | -0.438319 | 1.298859  | -2.575069 |
| C  | -0.600317 | -0.769068 | 2.864974  |
| H  | -0.629527 | 0.328949  | 2.907993  |
| H  | -1.616735 | -1.122223 | 2.655289  |
| H  | -0.316110 | -1.132907 | 3.862771  |
| C  | -1.086476 | -3.012891 | 0.571375  |
| H  | -0.888206 | -4.044917 | 0.896697  |
| H  | -1.950667 | -2.643748 | 1.133108  |
| H  | -1.376967 | -3.056336 | -0.486126 |
| C  | 1.537202  | -3.142196 | -1.196204 |
| H  | 2.060102  | -4.081332 | -0.963295 |
| H  | 0.578138  | -3.400427 | -1.662997 |
| H  | 2.135084  | -2.593197 | -1.935557 |
| C  | 3.811204  | -1.585176 | 0.348567  |
| H  | 4.282127  | -2.429014 | 0.876459  |
| H  | 3.975818  | -1.725823 | -0.726044 |
| H  | 4.306351  | -0.658554 | 0.653385  |
| C  | 2.417829  | 0.167348  | 2.618275  |
| H  | 3.132720  | -0.344531 | 3.278931  |
| H  | 2.955571  | 0.903968  | 2.005515  |

|   |           |           |           |   |           |           |           |
|---|-----------|-----------|-----------|---|-----------|-----------|-----------|
| H | 1.694045  | 0.701236  | 3.243160  | C | -0.394176 | -1.798792 | 2.725063  |
| C | -0.408403 | 2.509229  | 0.241287  | H | -1.365726 | -2.194410 | 2.406514  |
| C | -1.566698 | 1.857967  | -0.257347 | H | -0.034532 | -2.416188 | 3.560975  |
| C | -0.498894 | 3.877001  | 0.593790  | H | -0.553285 | -0.779806 | 3.104338  |
| C | -2.791609 | 2.549697  | -0.296321 | C | -0.677204 | -3.189286 | -0.164618 |
| C | -1.708972 | 4.534207  | 0.522159  | H | -0.448795 | -4.254224 | -0.010191 |
| H | 0.405268  | 4.368593  | 0.947774  | H | -1.608312 | -2.962882 | 0.366553  |
| C | -2.869712 | 3.875942  | 0.083988  | H | -0.868272 | -3.049718 | -1.234934 |
| H | -3.677420 | 2.039915  | -0.676444 | C | 1.980536  | -2.495916 | -1.826909 |
| H | -1.764303 | 5.582180  | 0.816602  | H | 2.751132  | -3.280500 | -1.830789 |
| H | -3.816401 | 4.408876  | 0.022777  | H | 1.098954  | -2.898870 | -2.339422 |
| C | 4.277989  | 1.244019  | -2.262712 | H | 2.355092  | -1.635705 | -2.398911 |
| H | 5.223235  | 0.782640  | -1.947939 | C | 3.962423  | -1.004674 | 0.099182  |
| H | 3.964408  | 0.820265  | -3.221381 | H | 4.649578  | -1.829992 | 0.336794  |
| H | 4.445704  | 2.321971  | -2.373009 | H | 4.047753  | -0.765103 | -0.965164 |
| O | 0.696315  | 1.853567  | 0.432857  | H | 4.281606  | -0.124547 | 0.669860  |
| C | 3.262362  | 1.047153  | -1.119013 | C | 2.433649  | -0.451008 | 2.872974  |
| O | 3.535188  | 1.513899  | -0.009922 | H | 2.736723  | -1.164914 | 3.652979  |
| H | 0.772256  | 0.472561  | -1.825178 | H | 3.307653  | 0.157682  | 2.614384  |
| H | -0.581218 | -0.512510 | -2.580391 | H | 1.677011  | 0.219243  | 3.299927  |
| C | -2.524929 | -0.422390 | -0.681301 | C | -0.848133 | 2.171103  | 0.918169  |
| C | -3.284611 | -0.402427 | 0.502426  | C | -1.572983 | 1.851033  | -0.249017 |
| C | -2.919315 | -1.313487 | -1.690016 | C | -1.071037 | 3.425969  | 1.518322  |
| C | -4.375743 | -1.240346 | 0.674495  | C | -2.538093 | 2.729807  | -0.740206 |
| H | -2.999698 | 0.291164  | 1.292728  | C | -2.015650 | 4.297820  | 0.999967  |
| C | -4.016209 | -2.152613 | -1.520066 | H | -0.495714 | 3.675316  | 2.409180  |
| H | -2.389297 | -1.333540 | -2.640267 | C | -2.760110 | 3.958872  | -0.131159 |
| C | -4.746963 | -2.124655 | -0.337639 | H | -3.110495 | 2.443392  | -1.624583 |
| H | -4.944318 | -1.201893 | 1.602411  | H | -2.176370 | 5.260394  | 1.485528  |
| H | -4.307085 | -2.823647 | -2.326680 | H | -3.498047 | 4.648320  | -0.536403 |
| H | -5.607001 | -2.779062 | -0.208110 | C | 3.545835  | 2.813151  | -1.618969 |

## L

E = -1322.6751961au

|    |           |           |           |   |           |           |           |
|----|-----------|-----------|-----------|---|-----------|-----------|-----------|
| N  | 1.906087  | 1.484030  | -0.414982 | O | -0.019016 | 1.301678  | 1.459623  |
| C  | 2.569941  | -1.395495 | 0.436031  | C | 2.706034  | 1.553072  | -1.484436 |
| C  | 1.894820  | -1.155622 | 1.679689  | O | 2.818602  | 0.659822  | -2.336151 |
| C  | 0.590907  | -1.789497 | 1.610116  | H | 1.864621  | 2.283390  | 0.210280  |
| C  | 0.455037  | -2.357699 | 0.317700  | H | -0.253827 | -0.560971 | -2.411484 |
| C  | 1.661801  | -2.069437 | -0.435485 | C | -2.441794 | -0.455983 | -0.751225 |
| Rh | 0.764059  | -0.127142 | 0.162573  | C | -3.108706 | -0.564663 | 0.477181  |
| C  | -1.350217 | 0.533937  | -0.912409 | C | -2.869177 | -1.255924 | -1.816744 |
| C  | -0.321547 | 0.348382  | -1.812257 | C | -4.141261 | -1.477476 | 0.645007  |
| H  | 0.276194  | 1.185674  | -2.155561 | H | -2.796010 | 0.074003  | 1.303633  |

|   |           |           |           |
|---|-----------|-----------|-----------|
| C | -3.916470 | -2.157601 | -1.654425 |
| H | -2.394416 | -1.148611 | -2.791857 |
| C | -4.548908 | -2.278226 | -0.421594 |
| H | -4.640114 | -1.558113 | 1.609837  |
| H | -4.244248 | -2.761800 | -2.498957 |
| H | -5.367547 | -2.984514 | -0.293507 |

### TS<sub>E-M</sub>

E = -1322.5338625au

|    |           |           |           |
|----|-----------|-----------|-----------|
| N  | 0.550322  | -1.885321 | 0.239260  |
| C  | 2.597140  | -1.374531 | -0.684442 |
| C  | 3.881922  | -1.903436 | -0.776164 |
| H  | 3.984294  | -2.985533 | -0.836081 |
| C  | 4.989955  | -1.066687 | -0.758352 |
| H  | 5.989981  | -1.491649 | -0.826775 |
| C  | 4.810595  | 0.305037  | -0.618421 |
| H  | 5.668682  | 0.973283  | -0.578125 |
| C  | 3.524456  | 0.826505  | -0.547398 |
| H  | 3.389835  | 1.905350  | -0.478524 |
| C  | 2.385286  | 0.014085  | -0.608230 |
| C  | -2.926435 | -1.231598 | -0.552818 |
| C  | -2.526353 | -1.173609 | 0.815183  |
| C  | -2.301653 | 0.209921  | 1.182353  |
| C  | -2.527745 | 0.993156  | 0.018611  |
| C  | -2.870556 | 0.106363  | -1.064448 |
| Rh | -0.810143 | -0.493104 | -0.471493 |
| C  | -3.256023 | 0.526588  | -2.442766 |
| H  | -4.334154 | 0.736019  | -2.504535 |
| H  | -2.733402 | 1.440937  | -2.750579 |
| H  | -3.028867 | -0.251950 | -3.182409 |
| C  | -3.346439 | -2.462691 | -1.280300 |
| H  | -4.422331 | -2.657578 | -1.150894 |
| H  | -3.151807 | -2.384228 | -2.357051 |
| H  | -2.804866 | -3.342577 | -0.911256 |
| C  | -2.465390 | -2.363817 | 1.708631  |
| H  | -3.470202 | -2.788542 | 1.849918  |
| H  | -1.826852 | -3.138905 | 1.264011  |
| H  | -2.031126 | -2.121358 | 2.680274  |
| C  | -1.980124 | 0.719270  | 2.544247  |
| H  | -2.893153 | 0.870130  | 3.139364  |
| H  | -1.317974 | 0.024929  | 3.077120  |
| H  | -1.456786 | 1.682214  | 2.486843  |
| C  | -2.480253 | 2.476721  | -0.085658 |
| H  | -3.490808 | 2.903034  | 0.002694  |

|   |           |           |           |
|---|-----------|-----------|-----------|
| H | -1.857888 | 2.924643  | 0.698841  |
| H | -2.072184 | 2.803523  | -1.052111 |
| O | 1.565617  | -2.281612 | -0.669801 |
| C | 0.928234  | -1.976083 | 1.546773  |
| O | 0.290518  | -1.400844 | 2.429691  |
| C | 2.078599  | -2.885868 | 1.906959  |
| H | 2.211841  | -3.697558 | 1.185667  |
| H | 3.015422  | -2.316539 | 1.957124  |
| H | 1.879474  | -3.289039 | 2.904839  |
| C | 0.883580  | 1.983068  | -0.119018 |
| C | 0.963361  | 2.056993  | 1.280424  |
| C | 0.727062  | 3.167274  | -0.845067 |
| C | 0.856386  | 3.280006  | 1.926900  |
| H | 1.086044  | 1.132558  | 1.850386  |
| C | 0.626866  | 4.395835  | -0.194034 |
| H | 0.710952  | 3.128999  | -1.934939 |
| C | 0.685470  | 4.455781  | 1.192426  |
| H | 0.909521  | 3.319532  | 3.014191  |
| H | 0.510953  | 5.308278  | -0.777443 |
| H | 0.609575  | 5.414399  | 1.703086  |
| C | 1.051826  | 0.671020  | -0.793189 |
| C | 0.413697  | 0.384164  | -2.050142 |
| H | -0.394821 | -1.019732 | -1.939967 |
| H | -0.254059 | 1.131278  | -2.485885 |
| H | 0.989017  | -0.168132 | -2.796894 |

### M

E = -1322.5953236au

|   |           |           |           |
|---|-----------|-----------|-----------|
| N | 0.563823  | -1.662579 | 0.621952  |
| C | 2.562815  | -1.482527 | -0.504334 |
| C | 3.819303  | -2.078582 | -0.628539 |
| H | 3.897823  | -3.140954 | -0.402427 |
| C | 4.922253  | -1.329432 | -1.004306 |
| H | 5.896863  | -1.806835 | -1.091910 |
| C | 4.778773  | 0.034977  | -1.242200 |
| H | 5.637207  | 0.642881  | -1.521162 |
| C | 3.525147  | 0.617149  | -1.123334 |
| H | 3.406146  | 1.683217  | -1.321808 |
| C | 2.384278  | -0.117586 | -0.771261 |
| C | -2.933512 | -1.171151 | -0.690097 |
| C | -2.629012 | -1.038087 | 0.698157  |
| C | -2.424095 | 0.369739  | 0.996948  |
| C | -2.500511 | 1.071906  | -0.215913 |
| C | -2.759505 | 0.119351  | -1.284289 |

|    |           |           |           |
|----|-----------|-----------|-----------|
| Rh | -0.790115 | -0.544034 | -0.504770 |
| C  | -3.063990 | 0.471332  | -2.701681 |
| H  | -4.142065 | 0.641128  | -2.842175 |
| H  | -2.551241 | 1.388824  | -3.015790 |
| H  | -2.761218 | -0.327084 | -3.390588 |
| C  | -3.376985 | -2.414089 | -1.385256 |
| H  | -4.468251 | -2.532782 | -1.310478 |
| H  | -3.117052 | -2.396977 | -2.450299 |
| H  | -2.916153 | -3.307946 | -0.949309 |
| C  | -2.697744 | -2.119628 | 1.719304  |
| H  | -3.701255 | -2.154091 | 2.170575  |
| H  | -2.498530 | -3.102977 | 1.276253  |
| H  | -1.959530 | -1.948380 | 2.511991  |
| C  | -2.265604 | 0.933273  | 2.364878  |
| H  | -3.224868 | 0.906183  | 2.904387  |
| H  | -1.531915 | 0.350097  | 2.931227  |
| H  | -1.928438 | 1.976209  | 2.338288  |
| C  | -2.386015 | 2.543655  | -0.402213 |
| H  | -3.381778 | 2.999576  | -0.508838 |
| H  | -1.880874 | 3.022719  | 0.444376  |
| H  | -1.816007 | 2.802881  | -1.304199 |
| O  | 1.558948  | -2.325658 | -0.124111 |
| C  | 0.791455  | -1.696088 | 1.954271  |
| O  | 0.074012  | -1.075454 | 2.748057  |
| C  | 1.951483  | -2.531763 | 2.451256  |
| H  | 1.941808  | -3.541286 | 2.025893  |
| H  | 2.908632  | -2.071392 | 2.172413  |
| H  | 1.883695  | -2.579160 | 3.541473  |
| C  | 1.005376  | 1.882827  | -0.043294 |
| C  | 1.034921  | 1.857506  | 1.357174  |
| C  | 0.965819  | 3.123346  | -0.690139 |
| C  | 0.993425  | 3.042224  | 2.080968  |
| H  | 1.038609  | 0.902021  | 1.883316  |
| C  | 0.939897  | 4.310116  | 0.037677  |
| H  | 0.978159  | 3.157775  | -1.780402 |
| C  | 0.947534  | 4.273291  | 1.426855  |
| H  | 0.996163  | 3.001528  | 3.169313  |
| H  | 0.917168  | 5.264811  | -0.486101 |
| H  | 0.924834  | 5.198277  | 2.000952  |
| H  | -0.430201 | -1.666307 | -1.533779 |
| C  | 1.080959  | 0.627701  | -0.847892 |
| C  | 0.341236  | 0.502869  | -2.036448 |
| H  | 0.695904  | -0.157464 | -2.825760 |
| H  | -0.315077 | 1.310016  | -2.363770 |

### TS<sub>M-N</sub>

E = -1322.573965au

|    |           |           |           |
|----|-----------|-----------|-----------|
| N  | 0.191455  | -2.156518 | -0.133729 |
| C  | 2.425523  | -1.752377 | -0.497376 |
| C  | 3.549736  | -2.535487 | -0.268878 |
| H  | 3.468108  | -3.608290 | -0.435584 |
| C  | 4.740527  | -1.950389 | 0.142931  |
| H  | 5.621670  | -2.565303 | 0.316028  |
| C  | 4.781218  | -0.576096 | 0.336285  |
| H  | 5.701251  | -0.091866 | 0.658995  |
| C  | 3.650160  | 0.196794  | 0.100732  |
| H  | 3.723047  | 1.274638  | 0.225946  |
| C  | 2.434635  | -0.355913 | -0.333139 |
| C  | -2.829864 | 0.391907  | -1.003904 |
| C  | -2.991605 | -0.599592 | 0.004539  |
| C  | -2.561107 | -0.030981 | 1.278828  |
| C  | -2.086298 | 1.259649  | 1.044853  |
| C  | -2.146896 | 1.496018  | -0.390040 |
| Rh | -0.801040 | -0.271693 | -0.380887 |
| C  | -1.904285 | 2.816623  | -1.037637 |
| H  | -2.801564 | 3.448979  | -0.953352 |
| H  | -1.071998 | 3.359451  | -0.574084 |
| H  | -1.679814 | 2.716741  | -2.107555 |
| C  | -3.292886 | 0.324764  | -2.420463 |
| H  | -4.274702 | 0.807592  | -2.542940 |
| H  | -2.595311 | 0.828682  | -3.101499 |
| H  | -3.389820 | -0.711664 | -2.765904 |
| C  | -3.732699 | -1.887120 | -0.131803 |
| H  | -4.772124 | -1.769138 | 0.212233  |
| H  | -3.768573 | -2.222403 | -1.175985 |
| H  | -3.259189 | -2.676241 | 0.460843  |
| C  | -2.715393 | -0.711101 | 2.594170  |
| H  | -3.779695 | -0.778871 | 2.868269  |
| H  | -2.312712 | -1.729133 | 2.553823  |
| H  | -2.202645 | -0.166028 | 3.395384  |
| C  | -1.674911 | 2.262908  | 2.063798  |
| H  | -2.546663 | 2.832686  | 2.421573  |
| H  | -1.207864 | 1.795474  | 2.940408  |
| H  | -0.958271 | 2.987383  | 1.660521  |
| O  | 1.309045  | -2.417837 | -0.956033 |
| C  | -0.208060 | -3.226217 | 0.622645  |
| O  | -1.246221 | -3.177302 | 1.272508  |
| C  | 0.687017  | -4.440865 | 0.636794  |

|   |           |           |           |
|---|-----------|-----------|-----------|
| H | 0.866527  | -4.823118 | -0.374319 |
| H | 1.664225  | -4.198820 | 1.073017  |
| H | 0.199747  | -5.205835 | 1.247017  |
| C | 1.396625  | 1.922512  | -0.170293 |
| C | 1.495352  | 2.150115  | 1.209266  |
| C | 1.506256  | 3.024005  | -1.025308 |
| C | 1.679207  | 3.429967  | 1.714153  |
| H | 1.421938  | 1.297236  | 1.886329  |
| C | 1.678796  | 4.311166  | -0.521904 |
| H | 1.475766  | 2.868195  | -2.103339 |
| C | 1.764423  | 4.520856  | 0.849755  |
| H | 1.746699  | 3.579383  | 2.791197  |
| H | 1.761299  | 5.151353  | -1.210025 |
| H | 1.906901  | 5.524873  | 1.245863  |
| H | -0.791712 | -1.664621 | -1.174062 |
| C | 1.294670  | 0.535165  | -0.708273 |
| C | 0.572785  | 0.295427  | -1.907681 |
| H | 0.847122  | -0.546870 | -2.540737 |
| H | 0.134824  | 1.138015  | -2.446136 |

## N

E = -1322.6019967au

|    |           |           |           |
|----|-----------|-----------|-----------|
| N  | -0.568953 | -2.129323 | -0.320710 |
| C  | 1.680791  | -2.450766 | 0.178004  |
| C  | 2.527694  | -3.528874 | 0.438549  |
| H  | 2.097350  | -4.416827 | 0.897861  |
| C  | 3.870927  | -3.456639 | 0.113252  |
| H  | 4.527688  | -4.298857 | 0.322378  |
| C  | 4.357859  | -2.305603 | -0.501797 |
| H  | 5.406198  | -2.232721 | -0.785305 |
| C  | 3.500913  | -1.245844 | -0.750250 |
| H  | 3.891806  | -0.339825 | -1.213339 |
| C  | 2.136403  | -1.264031 | -0.408555 |
| C  | -2.607189 | 1.274744  | -0.867287 |
| C  | -2.980288 | 0.477982  | 0.237136  |
| C  | -2.199211 | 0.885064  | 1.400028  |
| C  | -1.326139 | 1.903589  | 0.991998  |
| C  | -1.508257 | 2.098146  | -0.436589 |
| Rh | -0.771079 | 0.039618  | -0.305684 |
| C  | -0.923876 | 3.213052  | -1.235759 |
| H  | -1.556208 | 4.111696  | -1.166898 |
| H  | 0.079798  | 3.488040  | -0.889932 |
| H  | -0.851231 | 2.952187  | -2.300538 |
| C  | -3.221429 | 1.255824  | -2.225752 |

|   |           |           |           |
|---|-----------|-----------|-----------|
| H | -4.007131 | 2.020893  | -2.334345 |
| H | -2.473553 | 1.443140  | -3.007799 |
| H | -3.677576 | 0.280847  | -2.441612 |
| C | -4.151205 | -0.446817 | 0.260594  |
| H | -5.088792 | 0.129093  | 0.269643  |
| H | -4.180348 | -1.110687 | -0.613060 |
| H | -4.160566 | -1.081815 | 1.155925  |
| C | -2.390197 | 0.403529  | 2.799544  |
| H | -3.090381 | 1.042401  | 3.360335  |
| H | -2.801258 | -0.613762 | 2.835203  |
| H | -1.443360 | 0.392552  | 3.355447  |
| C | -0.424123 | 2.702905  | 1.864350  |
| H | -0.931775 | 3.612045  | 2.222662  |
| H | -0.103257 | 2.134676  | 2.747751  |
| H | 0.484684  | 3.019929  | 1.338991  |
| O | 0.379426  | -2.673410 | 0.588169  |
| C | -1.859754 | -2.719116 | -0.072443 |
| O | -2.606612 | -2.873208 | -1.007128 |
| C | -2.134776 | -3.087680 | 1.347989  |
| H | -1.602448 | -4.017703 | 1.584767  |
| H | -1.764453 | -2.323967 | 2.040283  |
| H | -3.209498 | -3.248463 | 1.468340  |
| C | 2.047173  | 1.197369  | -0.196196 |
| C | 2.480386  | 1.237185  | 1.138309  |
| C | 2.362280  | 2.289368  | -1.012722 |
| C | 3.181236  | 2.324603  | 1.639032  |
| H | 2.244522  | 0.390362  | 1.785403  |
| C | 3.055059  | 3.389025  | -0.509885 |
| H | 2.074811  | 2.272722  | -2.063861 |
| C | 3.468790  | 3.413896  | 0.817334  |
| H | 3.500303  | 2.326967  | 2.680699  |
| H | 3.287514  | 4.224294  | -1.169765 |
| H | 4.017367  | 4.269480  | 1.207668  |
| C | 1.344528  | -0.015631 | -0.703224 |
| C | 0.560362  | 0.020265  | -1.910345 |
| H | 0.543911  | -0.869504 | -2.549927 |
| H | 0.480215  | 0.945861  | -2.485845 |
| H | -0.283349 | -2.400924 | -1.270589 |

## TS<sub>N-O</sub>

E = -1322.5832337au

|   |          |           |           |
|---|----------|-----------|-----------|
| N | 2.000422 | 1.807613  | 0.283338  |
| C | 2.168771 | -2.017539 | -0.001040 |
| C | 1.572033 | -1.843155 | 1.325691  |

|    |           |           |           |
|----|-----------|-----------|-----------|
| C  | 0.234597  | -2.240713 | 1.273783  |
| C  | -0.059215 | -2.543046 | -0.124811 |
| C  | 1.190971  | -2.524290 | -0.869946 |
| Rh | 0.463745  | -0.491973 | -0.255402 |
| C  | -1.286447 | 0.695096  | -0.698475 |
| C  | -0.601071 | 0.238588  | -1.879940 |
| H  | -0.016848 | 0.945367  | -2.471081 |
| H  | 1.803642  | 2.411807  | 1.083555  |
| C  | -0.723160 | -2.389670 | 2.402524  |
| H  | -1.745345 | -2.122846 | 2.104740  |
| H  | -0.754588 | -3.430478 | 2.761723  |
| H  | -0.450418 | -1.756798 | 3.257143  |
| C  | -1.333174 | -3.150255 | -0.602552 |
| H  | -1.336795 | -4.233545 | -0.403844 |
| H  | -2.207672 | -2.715621 | -0.101229 |
| H  | -1.470595 | -3.013089 | -1.682680 |
| C  | 1.379060  | -2.946122 | -2.286247 |
| H  | 1.536208  | -4.033185 | -2.368635 |
| H  | 0.506394  | -2.695324 | -2.902920 |
| H  | 2.248529  | -2.450876 | -2.736208 |
| C  | 3.606174  | -1.805188 | -0.337037 |
| H  | 4.143940  | -2.764106 | -0.394991 |
| H  | 3.731926  | -1.291257 | -1.298464 |
| H  | 4.117359  | -1.199647 | 0.421988  |
| C  | 2.323962  | -1.403458 | 2.534772  |
| H  | 2.968217  | -2.206879 | 2.924322  |
| H  | 2.982543  | -0.551121 | 2.318801  |
| H  | 1.647474  | -1.099920 | 3.343214  |
| C  | 0.055504  | 2.840316  | -0.388060 |
| C  | -1.150101 | 2.122746  | -0.294651 |
| C  | 0.161016  | 4.190739  | -0.074231 |
| C  | -2.257507 | 2.871847  | 0.142841  |
| C  | -0.953790 | 4.894555  | 0.361831  |
| H  | 1.130430  | 4.673318  | -0.199780 |
| C  | -2.165279 | 4.218728  | 0.468098  |
| H  | -3.225330 | 2.380082  | 0.213378  |
| H  | -0.879559 | 5.953271  | 0.601610  |
| H  | -3.058833 | 4.749233  | 0.793776  |
| C  | 4.240694  | 1.658233  | 1.172397  |
| H  | 3.702010  | 1.615661  | 2.126860  |
| H  | 4.950785  | 0.826002  | 1.119771  |
| H  | 4.825213  | 2.586459  | 1.141480  |
| O  | 1.211367  | 2.204318  | -0.826140 |
| C  | 3.340865  | 1.614096  | -0.038974 |

|   |           |           |           |
|---|-----------|-----------|-----------|
| O | 3.730028  | 1.393452  | -1.162030 |
| H | -1.047613 | -0.567870 | -2.467350 |
| C | -2.559603 | 0.038415  | -0.284878 |
| C | -3.474490 | -0.448892 | -1.224221 |
| C | -2.897559 | -0.076366 | 1.071850  |
| C | -4.663122 | -1.057279 | -0.826403 |
| H | -3.255064 | -0.338656 | -2.285916 |
| C | -4.086335 | -0.671034 | 1.472858  |
| H | -2.195437 | 0.305522  | 1.815726  |
| C | -4.975134 | -1.174038 | 0.523132  |
| H | -5.354864 | -1.431339 | -1.580372 |
| H | -4.318635 | -0.749652 | 2.534757  |
| H | -5.905660 | -1.645050 | 0.835840  |

## O

$$E = -1322.6034672\text{au}$$

|    |           |           |           |
|----|-----------|-----------|-----------|
| N  | 2.577935  | 1.020427  | 0.647338  |
| C  | 1.367844  | -2.619981 | -0.193553 |
| C  | 0.954531  | -2.219581 | 1.152522  |
| C  | -0.446787 | -2.206450 | 1.211510  |
| C  | -0.920924 | -2.465990 | -0.138478 |
| C  | 0.216797  | -2.846486 | -0.961905 |
| Rh | 0.175840  | -0.652353 | -0.373297 |
| C  | -1.137866 | 1.003244  | -0.715078 |
| C  | -0.748802 | 0.357904  | -1.940702 |
| H  | -0.037096 | 0.863082  | -2.598916 |
| H  | 2.223503  | 0.391776  | 1.366209  |
| C  | -1.314698 | -1.987537 | 2.400836  |
| H  | -2.190067 | -1.368210 | 2.157438  |
| H  | -1.694749 | -2.941484 | 2.799274  |
| H  | -0.773082 | -1.485747 | 3.213717  |
| C  | -2.350584 | -2.680653 | -0.499336 |
| H  | -2.655198 | -3.715125 | -0.275891 |
| H  | -3.014179 | -2.009168 | 0.060206  |
| H  | -2.531777 | -2.509671 | -1.568100 |
| C  | 0.132342  | -3.341390 | -2.364771 |
| H  | -0.142973 | -4.406965 | -2.398801 |
| H  | -0.623147 | -2.792896 | -2.941625 |
| H  | 1.086916  | -3.228749 | -2.892666 |
| C  | 2.786921  | -2.784271 | -0.618508 |
| H  | 3.261706  | -3.652906 | -0.135999 |
| H  | 2.871190  | -2.917019 | -1.703131 |
| H  | 3.390981  | -1.902061 | -0.362149 |
| C  | 1.900538  | -2.027508 | 2.291493  |

|   |           |           |           |
|---|-----------|-----------|-----------|
| H | 2.115227  | -2.978498 | 2.802937  |
| H | 2.873104  | -1.640941 | 1.952496  |
| H | 1.501703  | -1.338469 | 3.049288  |
| C | 0.945010  | 2.360851  | -0.303832 |
| C | -0.443326 | 2.289858  | -0.409835 |
| C | 1.642704  | 3.549204  | -0.161079 |
| C | -1.135328 | 3.504925  | -0.313772 |
| C | 0.925733  | 4.735870  | -0.073531 |
| H | 2.729366  | 3.533250  | -0.120306 |
| C | -0.465230 | 4.709135  | -0.141107 |
| H | -2.222313 | 3.490648  | -0.385372 |
| H | 1.454536  | 5.679535  | 0.045933  |
| H | -1.032312 | 5.635883  | -0.071057 |
| C | 4.808296  | 0.457698  | 1.352472  |
| H | 4.322255  | 0.392099  | 2.333388  |
| H | 5.165582  | -0.540542 | 1.068357  |
| H | 5.683477  | 1.110222  | 1.425600  |
| O | 1.639955  | 1.138955  | -0.372300 |
| C | 3.906509  | 0.981885  | 0.261505  |
| O | 4.298636  | 1.373909  | -0.813509 |
| H | -1.461589 | -0.281722 | -2.468230 |
| C | -2.499532 | 0.847357  | -0.145704 |
| C | -3.607713 | 0.533921  | -0.940667 |
| C | -2.710971 | 1.021318  | 1.230944  |
| C | -4.870952 | 0.365015  | -0.379849 |
| H | -3.476863 | 0.429842  | -2.017423 |
| C | -3.970349 | 0.860161  | 1.792143  |
| H | -1.855136 | 1.270843  | 1.861694  |
| C | -5.059054 | 0.521447  | 0.989018  |
| H | -5.715992 | 0.118009  | -1.021524 |
| H | -4.104056 | 0.993987  | 2.865244  |
| H | -6.046756 | 0.391294  | 1.428424  |

### TS<sub>0-L</sub>

$$E = -1322.5623833\text{au}$$

|    |           |           |           |
|----|-----------|-----------|-----------|
| N  | 2.279376  | 1.138138  | -0.770848 |
| C  | 1.908767  | -2.192239 | 0.054581  |
| C  | 1.422351  | -1.867008 | 1.388739  |
| C  | 0.037485  | -2.135695 | 1.448006  |
| C  | -0.379201 | -2.489173 | 0.109426  |
| C  | 0.803888  | -2.600983 | -0.724566 |
| Rh | 0.422206  | -0.496309 | -0.150070 |
| C  | -1.243657 | 0.824662  | -0.710499 |
| C  | -0.477590 | 0.360926  | -1.831535 |

|   |           |           |           |
|---|-----------|-----------|-----------|
| H | 0.161944  | 1.064849  | -2.370461 |
| C | -0.858161 | -2.036731 | 2.633390  |
| H | -1.854383 | -1.668223 | 2.353539  |
| H | -1.000120 | -3.015024 | 3.118117  |
| H | -0.453085 | -1.352258 | 3.389110  |
| C | -1.739870 | -2.959089 | -0.270223 |
| H | -1.833374 | -4.041385 | -0.091727 |
| H | -2.523001 | -2.457740 | 0.310903  |
| H | -1.957241 | -2.781449 | -1.331157 |
| C | 0.850275  | -3.094032 | -2.129414 |
| H | 1.012364  | -4.182440 | -2.166911 |
| H | -0.084642 | -2.887058 | -2.665302 |
| H | 1.665016  | -2.619254 | -2.691108 |
| C | 3.316141  | -2.103527 | -0.425635 |
| H | 3.714532  | -3.095798 | -0.684694 |
| H | 3.380802  | -1.477969 | -1.331471 |
| H | 3.974089  | -1.648773 | 0.323344  |
| C | 2.286838  | -1.382389 | 2.499936  |
| H | 2.931486  | -2.192002 | 2.874627  |
| H | 2.938837  | -0.562307 | 2.165272  |
| H | 1.687483  | -1.018518 | 3.342789  |
| C | 0.348355  | 2.507539  | 0.306939  |
| C | -0.942480 | 2.168426  | -0.165361 |
| C | 0.685886  | 3.835997  | 0.623874  |
| C | -1.909101 | 3.186636  | -0.154676 |
| C | -0.280289 | 4.821162  | 0.579082  |
| H | 1.701736  | 4.035688  | 0.962902  |
| C | -1.586483 | 4.487549  | 0.199492  |
| H | -2.922492 | 2.949032  | -0.476545 |
| H | -0.033104 | 5.845285  | 0.853018  |
| H | -2.353281 | 5.259605  | 0.159535  |
| C | 4.565542  | 1.638378  | -1.383029 |
| H | 5.201783  | 0.782526  | -1.638969 |
| H | 4.110227  | 2.020345  | -2.303763 |
| H | 5.212780  | 2.410208  | -0.949843 |
| O | 1.236997  | 1.551043  | 0.584269  |
| C | 3.573948  | 1.189754  | -0.324272 |
| O | 3.944365  | 0.812506  | 0.774621  |
| H | 2.020978  | 1.863863  | -1.441966 |
| H | -0.909055 | -0.406884 | -2.478540 |
| C | -2.609104 | 0.306822  | -0.445606 |
| C | -3.121659 | 0.313648  | 0.861524  |
| C | -3.430661 | -0.183328 | -1.467039 |
| C | -4.390474 | -0.176461 | 1.138697  |



|   |           |           |           |
|---|-----------|-----------|-----------|
| H | -2.496065 | 0.700998  | 1.667801  |
| C | -4.702922 | -0.677249 | -1.191416 |
| H | -3.071416 | -0.161611 | -2.495543 |
| C | -5.187979 | -0.680839 | 0.111390  |
| H | -4.760841 | -0.166394 | 2.163183  |
| H | -5.323169 | -1.050069 | -2.005632 |
| H | -6.183636 | -1.065219 | 0.326620  |

**P**

E = -1322.5930417au

|    |           |           |           |
|----|-----------|-----------|-----------|
| N  | 3.184864  | 1.776738  | -0.770635 |
| C  | 1.270580  | -2.761369 | 0.012944  |
| C  | 0.723289  | -2.452193 | 1.335618  |
| C  | -0.664819 | -2.335601 | 1.233641  |
| C  | -0.989986 | -2.423187 | -0.184551 |
| C  | 0.210114  | -2.828989 | -0.905221 |
| Rh | 0.302577  | -0.714393 | -0.181483 |
| C  | -0.829374 | 1.085955  | -0.661672 |
| C  | -0.341249 | 0.396554  | -1.826771 |
| H  | 0.458058  | 0.819506  | -2.429178 |
| H  | 3.896244  | 2.014473  | -1.452975 |
| C  | -1.650373 | -2.188808 | 2.339226  |
| H  | -2.521514 | -1.599740 | 2.028062  |
| H  | -2.028704 | -3.169152 | 2.670048  |
| H  | -1.212300 | -1.693625 | 3.215749  |
| C  | -2.378206 | -2.490409 | -0.724064 |
| H  | -2.801166 | -3.497774 | -0.584065 |
| H  | -3.043669 | -1.775418 | -0.222551 |
| H  | -2.410389 | -2.267432 | -1.798014 |
| C  | 0.272065  | -3.223461 | -2.341032 |
| H  | 0.009154  | -4.283769 | -2.481620 |
| H  | -0.421683 | -2.634155 | -2.954161 |
| H  | 1.276656  | -3.075781 | -2.757649 |
| C  | 2.713585  | -3.028738 | -0.244612 |
| H  | 2.985182  | -4.071405 | -0.014925 |
| H  | 2.982209  | -2.841261 | -1.293134 |
| H  | 3.344180  | -2.385558 | 0.384142  |
| C  | 1.561151  | -2.329397 | 2.561328  |
| H  | 2.076387  | -3.273976 | 2.794419  |
| H  | 2.331737  | -1.555680 | 2.428868  |
| H  | 0.960886  | -2.053895 | 3.436521  |
| C  | 1.117190  | 2.767398  | -0.462358 |
| C  | -0.204717 | 2.361366  | -0.192290 |
| C  | 1.655033  | 3.964598  | -0.012450 |

|   |           |           |           |
|---|-----------|-----------|-----------|
| C | -0.952734 | 3.300256  | 0.546527  |
| C | 0.888862  | 4.839709  | 0.743716  |
| H | 2.688105  | 4.199144  | -0.262571 |
| C | -0.430182 | 4.498333  | 1.012628  |
| H | -1.993995 | 3.077548  | 0.762584  |
| H | 1.313551  | 5.775971  | 1.100697  |
| H | -1.067381 | 5.168913  | 1.587099  |
| C | 4.790445  | 0.403673  | 0.397758  |
| H | 4.892938  | 0.212207  | 1.470553  |
| H | 5.060102  | -0.518626 | -0.132674 |
| H | 5.488158  | 1.196469  | 0.105087  |
| O | 1.915012  | 1.945933  | -1.272219 |
| C | 3.356779  | 0.737940  | 0.099388  |
| O | 2.414653  | 0.164167  | 0.625539  |
| C | -2.280191 | 0.922114  | -0.332039 |
| C | -3.247209 | 0.929310  | -1.343148 |
| C | -2.727609 | 0.778464  | 0.989417  |
| C | -4.600252 | 0.767457  | -1.055186 |
| H | -2.929697 | 1.071982  | -2.375824 |
| C | -4.077181 | 0.630762  | 1.284143  |
| H | -1.984756 | 0.770241  | 1.789462  |
| C | -5.023794 | 0.616284  | 0.259755  |
| H | -5.327596 | 0.770656  | -1.866390 |
| H | -4.392222 | 0.515395  | 2.321308  |
| H | -6.081127 | 0.492363  | 0.488913  |
| H | -1.061974 | -0.186035 | -2.407297 |

**TS<sub>P-Q</sub>**

E = -1322.551575au

|    |           |           |           |
|----|-----------|-----------|-----------|
| N  | 0.739752  | 3.286324  | -0.970190 |
| C  | 2.900971  | -1.137973 | 0.226893  |
| C  | 2.287553  | -1.015994 | 1.537813  |
| C  | 1.106625  | -1.777488 | 1.534449  |
| C  | 0.952275  | -2.347937 | 0.203096  |
| C  | 2.113898  | -2.013739 | -0.570101 |
| Rh | 0.927094  | -0.157188 | -0.105226 |
| C  | -1.335312 | 0.287867  | -0.644528 |
| C  | -0.342944 | 0.374262  | -1.673932 |
| H  | -0.079719 | 1.360210  | -2.056112 |
| H  | 0.713650  | 4.305120  | -0.891507 |
| C  | 0.201200  | -2.019871 | 2.691286  |
| H  | -0.823695 | -2.236035 | 2.366603  |
| H  | 0.540720  | -2.885061 | 3.281461  |
| H  | 0.163207  | -1.155794 | 3.366663  |

|   |           |           |           |
|---|-----------|-----------|-----------|
| C | -0.015364 | -3.409180 | -0.186879 |
| H | 0.439370  | -4.401224 | -0.037229 |
| H | -0.939864 | -3.372806 | 0.398258  |
| H | -0.295638 | -3.332764 | -1.244987 |
| C | 2.419436  | -2.523086 | -1.935384 |
| H | 2.877044  | -3.524490 | -1.900252 |
| H | 1.509422  | -2.606363 | -2.544601 |
| H | 3.112390  | -1.862098 | -2.469788 |
| C | 4.208433  | -0.532659 | -0.140056 |
| H | 4.260209  | 0.514768  | 0.179328  |
| H | 5.035837  | -1.075966 | 0.341165  |
| H | 4.373785  | -0.553280 | -1.224002 |
| C | 2.843793  | -0.196169 | 2.650079  |
| H | 3.197007  | 0.775184  | 2.279453  |
| H | 2.089684  | 0.002465  | 3.420963  |
| H | 3.696911  | -0.693173 | 3.137530  |
| C | -1.385603 | 2.658222  | 0.398480  |
| C | -2.015385 | 1.459303  | -0.064403 |
| C | -2.166161 | 3.782293  | 0.780929  |
| C | -3.431656 | 1.457608  | -0.002597 |
| C | -3.536387 | 3.734286  | 0.811064  |
| H | -1.614129 | 4.667012  | 1.096676  |
| C | -4.170804 | 2.549274  | 0.405307  |
| H | -3.968957 | 0.576092  | -0.344263 |
| H | -4.120042 | 4.594716  | 1.134035  |
| H | -5.258166 | 2.491211  | 0.385122  |
| C | 3.167600  | 3.676401  | -1.081006 |
| H | 4.030844  | 3.059148  | -1.350160 |
| H | 2.980804  | 4.405395  | -1.878318 |
| H | 3.414692  | 4.232251  | -0.165732 |
| O | -0.098479 | 2.760029  | 0.561764  |
| C | 1.974479  | 2.788110  | -0.821613 |
| O | 2.172782  | 1.611841  | -0.461929 |
| H | -0.327486 | -0.419456 | -2.425274 |
| C | -2.131373 | -0.970530 | -0.534511 |
| C | -2.633354 | -1.382662 | 0.710056  |
| C | -2.497742 | -1.719715 | -1.657746 |
| C | -3.443231 | -2.502965 | 0.830975  |
| H | -2.384945 | -0.788156 | 1.590518  |
| C | -3.309311 | -2.846137 | -1.542106 |
| H | -2.167134 | -1.398390 | -2.644988 |
| C | -3.782978 | -3.247708 | -0.298737 |
| H | -3.814401 | -2.797806 | 1.812193  |
| H | -3.584007 | -3.404194 | -2.436587 |

|   |           |           |           |
|---|-----------|-----------|-----------|
| H | -4.421269 | -4.125152 | -0.209336 |
|---|-----------|-----------|-----------|

## Q

E = -1322.6481529au

|    |           |           |           |
|----|-----------|-----------|-----------|
| N  | 1.518984  | 2.555012  | -2.215871 |
| C  | 2.600663  | -1.673891 | 0.499614  |
| C  | 1.889848  | -1.273069 | 1.667633  |
| C  | 0.523623  | -1.717611 | 1.533201  |
| C  | 0.411752  | -2.439586 | 0.291684  |
| C  | 1.679408  | -2.370910 | -0.376079 |
| Rh | 0.947188  | -0.358674 | -0.109504 |
| C  | -1.542074 | 0.548059  | -0.754838 |
| C  | -0.551467 | 0.190563  | -1.668224 |
| H  | 0.058857  | 0.979043  | -2.123426 |
| C  | -0.528080 | -1.512134 | 2.566859  |
| H  | -1.523718 | -1.778603 | 2.193560  |
| H  | -0.329142 | -2.123045 | 3.459993  |
| H  | -0.557668 | -0.459578 | 2.881605  |
| C  | -0.789970 | -3.171742 | -0.189500 |
| H  | -0.749968 | -4.219160 | 0.143871  |
| H  | -1.722738 | -2.736348 | 0.189322  |
| H  | -0.850309 | -3.179457 | -1.284734 |
| C  | 2.047756  | -2.958237 | -1.693357 |
| H  | 2.610918  | -3.895799 | -1.573058 |
| H  | 1.160429  | -3.179481 | -2.298221 |
| H  | 2.670177  | -2.259253 | -2.266534 |
| C  | 4.005386  | -1.356374 | 0.143176  |
| H  | 4.544127  | -2.257903 | -0.177968 |
| H  | 3.995798  | -0.633053 | -0.688878 |
| H  | 4.549368  | -0.906982 | 0.981695  |
| C  | 2.384924  | -0.416013 | 2.776202  |
| H  | 2.144641  | -0.852702 | 3.755151  |
| H  | 3.469375  | -0.269845 | 2.723253  |
| H  | 1.907637  | 0.575796  | 2.719777  |
| C  | -0.282120 | 2.288472  | 0.534661  |
| C  | -1.491514 | 1.833146  | -0.071053 |
| C  | -0.218100 | 3.637160  | 0.961211  |
| C  | -2.620161 | 2.675443  | -0.067502 |
| C  | -1.328491 | 4.450733  | 0.904389  |
| H  | 0.727349  | 3.984418  | 1.376653  |
| C  | -2.548898 | 3.971131  | 0.403284  |
| H  | -3.549526 | 2.304040  | -0.500739 |
| H  | -1.259153 | 5.477452  | 1.263484  |
| H  | -3.421719 | 4.619364  | 0.362116  |

|   |           |           |           |
|---|-----------|-----------|-----------|
| C | 3.376039  | 2.484310  | -0.566570 |
| H | 4.368270  | 2.070786  | -0.792666 |
| H | 3.425119  | 3.578531  | -0.633619 |
| H | 3.121744  | 2.203162  | 0.466229  |
| O | 0.703407  | 1.488150  | 0.816014  |
| C | 2.334568  | 1.880749  | -1.482041 |
| O | 2.311626  | 0.565974  | -1.462907 |
| H | 1.687025  | 3.554349  | -2.089314 |
| H | -0.682370 | -0.724888 | -2.250327 |
| C | -2.724575 | -0.310407 | -0.542180 |
| C | -3.342533 | -0.364688 | 0.716266  |
| C | -3.253249 | -1.092432 | -1.578169 |
| C | -4.424865 | -1.205138 | 0.942177  |
| H | -2.945943 | 0.252746  | 1.521864  |
| C | -4.346113 | -1.921171 | -1.357489 |
| H | -2.813204 | -1.026902 | -2.572251 |
| C | -4.928227 | -1.988481 | -0.094343 |
| H | -4.881480 | -1.246847 | 1.929771  |
| H | -4.750556 | -2.512648 | -2.177101 |
| H | -5.781112 | -2.642218 | 0.080342  |

### TS<sub>E-N</sub>

$$E = -1322.5628293\text{au}$$

|    |           |           |           |
|----|-----------|-----------|-----------|
| N  | -1.128979 | -1.792902 | -0.322834 |
| C  | 0.970907  | -2.677510 | 0.240271  |
| C  | 1.518614  | -3.912101 | 0.593306  |
| H  | 0.854159  | -4.651579 | 1.037702  |
| C  | 2.860042  | -4.177617 | 0.377069  |
| H  | 3.273693  | -5.146289 | 0.651874  |
| C  | 3.660856  | -3.201837 | -0.210950 |
| H  | 4.713629  | -3.394528 | -0.409183 |
| C  | 3.108061  | -1.975636 | -0.545989 |
| H  | 3.742247  | -1.212097 | -0.995874 |
| C  | 1.757521  | -1.657917 | -0.320026 |
| C  | -2.703073 | 1.536643  | -0.140084 |
| C  | -2.398786 | 0.895106  | 1.113198  |
| C  | -1.193146 | 1.457694  | 1.657634  |
| C  | -0.691766 | 2.369783  | 0.681621  |
| C  | -1.617656 | 2.402779  | -0.429463 |
| Rh | -0.766155 | 0.305764  | -0.210297 |
| C  | -1.450076 | 3.246764  | -1.646269 |
| H  | -1.839160 | 4.264042  | -1.489484 |
| H  | -0.390763 | 3.342013  | -1.919405 |
| H  | -1.975706 | 2.818467  | -2.508536 |

|   |           |           |           |
|---|-----------|-----------|-----------|
| C | -3.919787 | 1.291389  | -0.962821 |
| H | -4.816634 | 1.707316  | -0.479357 |
| H | -3.833341 | 1.758900  | -1.950995 |
| H | -4.080153 | 0.217441  | -1.122060 |
| C | -3.249651 | -0.130649 | 1.781488  |
| H | -3.900857 | 0.330328  | 2.538610  |
| H | -3.891456 | -0.647333 | 1.056979  |
| H | -2.633056 | -0.885441 | 2.289504  |
| C | -0.603540 | 1.163032  | 2.994273  |
| H | -0.988365 | 1.842963  | 3.770031  |
| H | -0.831659 | 0.137548  | 3.312167  |
| H | 0.489317  | 1.264618  | 2.979683  |
| C | 0.458592  | 3.295584  | 0.851658  |
| H | 0.105790  | 4.269301  | 1.224253  |
| H | 1.193923  | 2.911077  | 1.567419  |
| H | 0.990447  | 3.474391  | -0.091104 |
| O | -0.350604 | -2.548450 | 0.580740  |
| C | -2.347638 | -2.380658 | -0.594074 |
| O | -3.147652 | -1.817771 | -1.327814 |
| C | -2.623810 | -3.718006 | 0.040588  |
| H | -1.837193 | -4.444333 | -0.194249 |
| H | -2.654564 | -3.625904 | 1.133655  |
| H | -3.588796 | -4.074884 | -0.328549 |
| C | 2.230599  | 0.799084  | -0.408568 |
| C | 2.829656  | 0.847355  | 0.862199  |
| C | 2.613672  | 1.771245  | -1.340891 |
| C | 3.766059  | 1.819266  | 1.182432  |
| H | 2.553179  | 0.092166  | 1.599292  |
| C | 3.549069  | 2.752038  | -1.018195 |
| H | 2.199331  | 1.744590  | -2.348371 |
| C | 4.132325  | 2.783000  | 0.243127  |
| H | 4.216594  | 1.825337  | 2.174336  |
| H | 3.834270  | 3.487043  | -1.770079 |
| H | 4.871394  | 3.542748  | 0.490984  |
| C | 1.279784  | -0.293871 | -0.732408 |
| C | 0.464428  | -0.251456 | -1.937801 |
| H | 0.466271  | -1.158195 | -2.559606 |
| H | 0.428829  | 0.644944  | -2.559140 |
| H | -0.713013 | -1.034958 | -1.388646 |

### TS<sub>M-J</sub>

$$E = -1322.5117916\text{au}$$

|   |          |           |           |
|---|----------|-----------|-----------|
| N | 0.679278 | -1.698163 | 0.635093  |
| C | 2.595207 | -1.213317 | -0.639013 |

|    |           |           |           |
|----|-----------|-----------|-----------|
| C  | 3.818435  | -1.860256 | -0.632388 |
| H  | 3.845077  | -2.944089 | -0.727963 |
| C  | 4.978372  | -1.106311 | -0.493204 |
| H  | 5.949826  | -1.596028 | -0.489739 |
| C  | 4.877885  | 0.272593  | -0.341911 |
| H  | 5.777195  | 0.873879  | -0.221283 |
| C  | 3.635027  | 0.897943  | -0.358817 |
| H  | 3.572542  | 1.980830  | -0.260040 |
| C  | 2.448925  | 0.175380  | -0.528956 |
| C  | -2.713118 | -0.760259 | -1.160875 |
| C  | -2.601605 | -1.321350 | 0.134025  |
| C  | -2.524168 | -0.222889 | 1.108723  |
| C  | -2.546973 | 0.984457  | 0.410199  |
| C  | -2.541921 | 0.662131  | -1.002763 |
| Rh | -0.665912 | -0.356540 | -0.360731 |
| C  | -2.694054 | 1.679523  | -2.082085 |
| H  | -3.737191 | 2.026758  | -2.136734 |
| H  | -2.072470 | 2.566339  | -1.895024 |
| H  | -2.432079 | 1.278125  | -3.069296 |
| C  | -2.964748 | -1.472821 | -2.446506 |
| H  | -4.029580 | -1.439297 | -2.725537 |
| H  | -2.395433 | -1.026582 | -3.272701 |
| H  | -2.675050 | -2.528959 | -2.385305 |
| C  | -2.758499 | -2.757723 | 0.501976  |
| H  | -3.813263 | -2.999492 | 0.705013  |
| H  | -2.417070 | -3.419238 | -0.305854 |
| H  | -2.179753 | -3.001063 | 1.400953  |
| C  | -2.460274 | -0.426704 | 2.582205  |
| H  | -3.414337 | -0.818771 | 2.966937  |
| H  | -1.675489 | -1.151215 | 2.838539  |
| H  | -2.247212 | 0.511617  | 3.108604  |
| C  | -2.505245 | 2.368125  | 0.953570  |
| H  | -3.454573 | 2.896642  | 0.775637  |
| H  | -2.318736 | 2.374169  | 2.033661  |
| H  | -1.709310 | 2.963528  | 0.482214  |
| O  | 1.450592  | -2.036325 | -0.676024 |
| C  | 0.539888  | -2.816411 | 1.397235  |
| O  | -0.126892 | -2.735401 | 2.427560  |
| C  | 1.235474  | -4.093880 | 0.994700  |
| H  | 0.847752  | -4.470394 | 0.039834  |
| H  | 2.315149  | -3.944351 | 0.873235  |
| H  | 1.056037  | -4.831640 | 1.781305  |
| C  | 0.967219  | 2.159072  | -0.002777 |
| C  | 1.136478  | 2.207605  | 1.389876  |

|   |           |           |           |
|---|-----------|-----------|-----------|
| C | 0.664820  | 3.347972  | -0.674641 |
| C | 1.004824  | 3.402315  | 2.082085  |
| H | 1.357015  | 1.279702  | 1.920458  |
| C | 0.527927  | 4.548000  | 0.022304  |
| H | 0.564685  | 3.338845  | -1.760338 |
| C | 0.699735  | 4.581181  | 1.400704  |
| H | 1.136672  | 3.415950  | 3.163113  |
| H | 0.297729  | 5.462962  | -0.522238 |
| H | 0.598179  | 5.519160  | 1.944030  |
| H | 0.536288  | -1.518063 | -1.217800 |
| C | 1.142365  | 0.869555  | -0.715861 |
| C | 0.465586  | 0.569782  | -1.933030 |
| H | 0.969663  | -0.049767 | -2.679090 |
| H | -0.196124 | 1.313442  | -2.378287 |

### TS<sub>D-E1</sub>

$$E = -1322.5592514\text{au}$$

|    |           |           |           |
|----|-----------|-----------|-----------|
| Rh | 0.274762  | 0.385385  | -0.022298 |
| C  | -1.187585 | 1.912017  | 1.025729  |
| C  | 0.150132  | 2.075777  | 1.560543  |
| C  | 1.015152  | 2.477353  | 0.519245  |
| C  | -1.128368 | 2.164123  | -0.360304 |
| C  | 0.245811  | 2.454042  | -0.705451 |
| C  | 4.186358  | -0.331376 | -1.891541 |
| C  | 4.547391  | -1.524602 | -1.275202 |
| C  | 3.664901  | -2.144358 | -0.395888 |
| C  | 2.439531  | -1.538701 | -0.142440 |
| C  | 2.051907  | -0.323249 | -0.710980 |
| C  | 2.950725  | 0.255122  | -1.607804 |
| H  | 4.862747  | 0.145100  | -2.600214 |
| H  | 5.512171  | -1.984581 | -1.483002 |
| H  | 3.906790  | -3.091515 | 0.084359  |
| H  | 2.681264  | 1.180012  | -2.119623 |
| O  | 1.556222  | -2.251977 | 0.636770  |
| N  | 0.366187  | -1.540380 | 0.902973  |
| C  | -0.039559 | -1.768256 | 2.208616  |
| C  | 0.760206  | -2.755804 | 3.019020  |
| H  | 0.847978  | -3.720643 | 2.508181  |
| H  | 1.779977  | -2.386086 | 3.176320  |
| H  | 0.258423  | -2.879926 | 3.982205  |
| O  | -1.004683 | -1.187102 | 2.687799  |
| C  | -2.253205 | 2.180475  | -1.335585 |
| H  | -3.141018 | 1.661834  | -0.955902 |
| H  | -2.544004 | 3.214639  | -1.575678 |

|   |           |           |           |   |           |           |           |
|---|-----------|-----------|-----------|---|-----------|-----------|-----------|
| H | -1.970470 | 1.693634  | -2.278939 | C | 3.255426  | -2.736970 | 0.064695  |
| C | -2.392228 | 1.657981  | 1.864778  | C | 2.149294  | -1.899567 | 0.083466  |
| H | -3.257270 | 1.358749  | 1.260690  | C | 2.109042  | -0.629811 | -0.492851 |
| H | -2.204423 | 0.861285  | 2.595975  | C | 3.267697  | -0.240626 | -1.167319 |
| H | -2.673039 | 2.565452  | 2.421509  | H | 5.286777  | -0.714530 | -1.754871 |
| C | 0.489425  | 1.879504  | 2.996654  | H | 5.285710  | -2.930438 | -0.618653 |
| H | 1.572447  | 1.822852  | 3.157273  | H | 3.207181  | -3.714976 | 0.541222  |
| H | 0.101347  | 2.706624  | 3.610070  | H | 3.295800  | 0.723650  | -1.676460 |
| H | 0.038011  | 0.952973  | 3.374763  | O | 0.995030  | -2.428181 | 0.643387  |
| C | 2.449567  | 2.862753  | 0.637586  | N | -0.074629 | -1.473957 | 0.630870  |
| H | 2.856248  | 2.587887  | 1.617979  | C | -0.755287 | -1.858982 | 1.902935  |
| H | 3.072457  | 2.366896  | -0.119047 | C | -1.395663 | -3.206683 | 1.859859  |
| H | 2.577951  | 3.948794  | 0.517666  | H | -2.266102 | -3.164653 | 1.190919  |
| C | 0.690991  | 2.983113  | -2.028147 | H | -0.698909 | -3.945597 | 1.449922  |
| H | 0.399923  | 2.326144  | -2.858521 | H | -1.719849 | -3.495302 | 2.862965  |
| H | 0.247268  | 3.972269  | -2.220526 | O | -0.713695 | -1.112144 | 2.837534  |
| H | 1.779801  | 3.107729  | -2.065089 | C | -1.932478 | 2.430240  | -1.375803 |
| C | -0.597929 | -1.208194 | -0.873190 | H | -2.807951 | 1.933579  | -0.939401 |
| C | -2.069925 | -1.236156 | -0.866708 | H | -2.206239 | 3.477117  | -1.576059 |
| C | -2.881445 | -1.179291 | 0.272663  | H | -1.739821 | 1.950974  | -2.344939 |
| C | -2.697112 | -1.237440 | -2.129710 | C | -1.922701 | 2.186257  | 1.851320  |
| C | -4.265629 | -1.146203 | 0.152156  | H | -2.869368 | 2.043074  | 1.317861  |
| H | -2.418455 | -1.167226 | 1.255782  | H | -1.835299 | 1.396868  | 2.612950  |
| C | -4.079143 | -1.156000 | -2.240872 | H | -1.992165 | 3.143036  | 2.391683  |
| H | -2.090559 | -1.262224 | -3.034832 | C | 1.040855  | 2.126067  | 2.815156  |
| C | -4.873962 | -1.122166 | -1.099448 | H | 2.120798  | 1.955099  | 2.897983  |
| H | -4.874170 | -1.127755 | 1.055693  | H | 0.805753  | 3.052750  | 3.362025  |
| H | -4.535699 | -1.131683 | -3.229253 | H | 0.533842  | 1.299946  | 3.329665  |
| H | -5.958290 | -1.079153 | -1.185894 | C | 2.933914  | 2.610482  | 0.330932  |
| C | 0.027240  | -2.246731 | -1.748044 | H | 3.461960  | 1.778274  | 0.815144  |
| H | 0.740686  | -1.807532 | -2.457017 | H | 3.370001  | 2.739397  | -0.666138 |
| H | 0.604046  | -2.953911 | -1.139345 | H | 3.156206  | 3.524991  | 0.899771  |
| H | -0.731526 | -2.830085 | -2.283598 | C | 1.085569  | 2.709603  | -2.304044 |

## E1

$$E = -1322.5790856\text{au}$$

|    |           |           |           |   |           |           |           |
|----|-----------|-----------|-----------|---|-----------|-----------|-----------|
| Rh | 0.410345  | 0.413101  | -0.042044 | C | 3.255426  | -2.736970 | 0.064695  |
| C  | -0.749218 | 2.195025  | 0.930067  | C | 2.149294  | -1.899567 | 0.083466  |
| C  | 0.616161  | 2.215350  | 1.390113  | C | 2.109042  | -0.629811 | -0.492851 |
| C  | 1.458879  | 2.389823  | 0.268434  | C | 3.267697  | -0.240626 | -1.167319 |
| C  | -0.743700 | 2.345778  | -0.481669 | H | 5.286777  | -0.714530 | -1.754871 |
| C  | 0.626676  | 2.414565  | -0.916049 | H | 5.285710  | -2.930438 | -0.618653 |
| C  | 4.401154  | -1.054588 | -1.218979 | H | 3.207181  | -3.714976 | 0.541222  |
| C  | 4.401623  | -2.295756 | -0.591479 | H | 3.295800  | 0.723650  | -1.676460 |
|    |           |           |           | O | 0.995030  | -2.428181 | 0.643387  |
|    |           |           |           | N | -0.074629 | -1.473957 | 0.630870  |
|    |           |           |           | C | -0.755287 | -1.858982 | 1.902935  |
|    |           |           |           | C | -1.395663 | -3.206683 | 1.859859  |
|    |           |           |           | H | -2.266102 | -3.164653 | 1.190919  |
|    |           |           |           | H | -0.698909 | -3.945597 | 1.449922  |
|    |           |           |           | H | -1.719849 | -3.495302 | 2.862965  |
|    |           |           |           | O | -0.713695 | -1.112144 | 2.837534  |
|    |           |           |           | C | -1.932478 | 2.430240  | -1.375803 |
|    |           |           |           | H | -2.807951 | 1.933579  | -0.939401 |
|    |           |           |           | H | -2.206239 | 3.477117  | -1.576059 |
|    |           |           |           | H | -1.739821 | 1.950974  | -2.344939 |
|    |           |           |           | C | -1.922701 | 2.186257  | 1.851320  |
|    |           |           |           | H | -2.869368 | 2.043074  | 1.317861  |
|    |           |           |           | H | -1.835299 | 1.396868  | 2.612950  |
|    |           |           |           | H | -1.992165 | 3.143036  | 2.391683  |
|    |           |           |           | C | 1.040855  | 2.126067  | 2.815156  |
|    |           |           |           | H | 2.120798  | 1.955099  | 2.897983  |
|    |           |           |           | H | 0.805753  | 3.052750  | 3.362025  |
|    |           |           |           | H | 0.533842  | 1.299946  | 3.329665  |
|    |           |           |           | C | 2.933914  | 2.610482  | 0.330932  |
|    |           |           |           | H | 3.461960  | 1.778274  | 0.815144  |
|    |           |           |           | H | 3.370001  | 2.739397  | -0.666138 |
|    |           |           |           | H | 3.156206  | 3.524991  | 0.899771  |
|    |           |           |           | C | 1.085569  | 2.709603  | -2.304044 |
|    |           |           |           | H | 0.390544  | 2.304699  | -3.050036 |
|    |           |           |           | H | 1.169983  | 3.793072  | -2.482588 |
|    |           |           |           | H | 2.068655  | 2.267444  | -2.510368 |
|    |           |           |           | C | -0.709464 | -1.280341 | -0.684344 |
|    |           |           |           | C | -2.173047 | -1.002101 | -0.710169 |
|    |           |           |           | C | -2.918987 | -0.559917 | 0.396850  |
|    |           |           |           | C | -2.882315 | -1.148910 | -1.917852 |
|    |           |           |           | C | -4.282575 | -0.308100 | 0.311921  |
|    |           |           |           | H | -2.435385 | -0.369664 | 1.349896  |
|    |           |           |           | C | -4.241694 | -0.875677 | -2.008483 |
|    |           |           |           | H | -2.366187 | -1.478955 | -2.814921 |

|   |           |           |           |
|---|-----------|-----------|-----------|
| C | -4.959917 | -0.461030 | -0.893204 |
| H | -4.814035 | 0.024613  | 1.203407  |
| H | -4.742592 | -0.998945 | -2.967825 |
| H | -6.026721 | -0.257255 | -0.962066 |
| C | -0.248699 | -2.218056 | -1.775971 |
| H | -0.339617 | -1.718508 | -2.747092 |
| H | 0.795430  | -2.512798 | -1.685788 |
| H | -0.865472 | -3.132674 | -1.804899 |

### C1'

E = -1322.60738au

|    |           |           |           |
|----|-----------|-----------|-----------|
| N  | -0.907437 | 1.741707  | -0.418233 |
| C  | -2.862974 | 0.698291  | -0.918265 |
| C  | -4.195643 | 0.683356  | -1.327654 |
| H  | -4.763323 | 1.612546  | -1.326833 |
| C  | -4.763909 | -0.517674 | -1.737625 |
| H  | -5.804277 | -0.535418 | -2.058560 |
| C  | -4.004540 | -1.684146 | -1.759756 |
| H  | -4.443688 | -2.620568 | -2.101133 |
| C  | -2.670625 | -1.649214 | -1.347529 |
| H  | -2.076297 | -2.566001 | -1.372216 |
| C  | -2.094487 | -0.467527 | -0.893578 |
| C  | 0.901223  | -0.072887 | 2.022695  |
| C  | -0.527711 | 0.031338  | 2.196193  |
| C  | -1.131137 | -1.211700 | 1.815495  |
| C  | -0.096442 | -2.040450 | 1.276598  |
| C  | 1.159377  | -1.339305 | 1.448179  |
| Rh | -0.269801 | -0.212416 | 0.002259  |
| C  | 0.398885  | -0.879417 | -2.028232 |
| C  | 1.224701  | 0.195120  | -1.731201 |
| C  | 2.493159  | -1.933678 | 1.171723  |
| H  | 2.805067  | -2.557643 | 2.023262  |
| H  | 2.478544  | -2.580715 | 0.285900  |
| H  | 3.264257  | -1.172819 | 1.007328  |
| C  | 1.889254  | 0.959436  | 2.442498  |
| H  | 1.861094  | 1.102069  | 3.532850  |
| H  | 2.911355  | 0.669976  | 2.172857  |
| H  | 1.675778  | 1.921434  | 1.956403  |
| C  | -1.239950 | 1.195159  | 2.794778  |
| H  | -1.498993 | 0.995097  | 3.845158  |
| H  | -0.612832 | 2.094491  | 2.767962  |
| H  | -2.170646 | 1.418180  | 2.256083  |
| C  | -2.563210 | -1.565701 | 2.016798  |
| H  | -2.717751 | -1.945618 | 3.037655  |

|   |           |           |           |
|---|-----------|-----------|-----------|
| H | -3.218153 | -0.695508 | 1.881901  |
| H | -2.902928 | -2.335269 | 1.314770  |
| C | -0.230932 | -3.455919 | 0.829308  |
| H | 0.055285  | -4.156314 | 1.628502  |
| H | -1.261986 | -3.691634 | 0.539620  |
| H | 0.412598  | -3.670398 | -0.034324 |
| H | 0.874480  | 1.192991  | -1.996578 |
| H | 0.762857  | -1.906410 | -1.939211 |
| H | -0.463862 | -0.746701 | -2.674606 |
| C | 2.656563  | 0.096170  | -1.407733 |
| C | 3.308705  | 1.165266  | -0.776198 |
| C | 3.414239  | -1.013088 | -1.805604 |
| C | 4.671784  | 1.101583  | -0.518079 |
| H | 2.714063  | 2.028952  | -0.474057 |
| C | 4.780164  | -1.070198 | -1.553177 |
| H | 2.932243  | -1.828494 | -2.345140 |
| C | 5.412476  | -0.016330 | -0.900727 |
| H | 5.163538  | 1.935647  | -0.019021 |
| H | 5.354507  | -1.937261 | -1.876439 |
| H | 6.482811  | -0.058047 | -0.704310 |
| O | -2.328816 | 1.868296  | -0.499955 |
| C | -0.324872 | 2.901672  | -0.047568 |
| O | 0.886656  | 2.957530  | 0.203302  |
| C | -1.194636 | 4.135421  | 0.025328  |
| H | -0.549966 | 4.992888  | 0.235850  |
| H | -1.747457 | 4.296817  | -0.906676 |
| H | -1.942681 | 4.030422  | 0.822218  |

### TS<sub>C1'-D'</sub>

E = -1322.5846389au

|   |           |           |           |
|---|-----------|-----------|-----------|
| N | -1.322858 | 1.462290  | -0.818306 |
| C | -2.689964 | -0.343217 | -1.155519 |
| C | -3.944169 | -0.934668 | -1.287742 |
| H | -4.811176 | -0.296361 | -1.448770 |
| C | -4.065430 | -2.316797 | -1.195997 |
| H | -5.046888 | -2.775336 | -1.305107 |
| C | -2.942822 | -3.109858 | -0.964148 |
| H | -3.036756 | -4.192164 | -0.894512 |
| C | -1.692997 | -2.508981 | -0.841984 |
| H | -0.805724 | -3.129679 | -0.695461 |
| C | -1.536563 | -1.122924 | -0.930533 |
| C | 0.890822  | 0.974822  | 1.934105  |
| C | -0.540913 | 0.955317  | 2.148926  |
| C | -0.978980 | -0.401002 | 2.231813  |

|    |           |           |           |
|----|-----------|-----------|-----------|
| C  | 0.174843  | -1.227807 | 2.009137  |
| C  | 1.326518  | -0.380493 | 1.878552  |
| Rh | -0.153082 | 0.054588  | 0.182966  |
| C  | 0.030424  | -0.692197 | -2.013158 |
| C  | 1.056044  | 0.222475  | -1.584194 |
| C  | 2.735439  | -0.847249 | 1.824320  |
| H  | 3.145233  | -0.918464 | 2.843206  |
| H  | 2.825109  | -1.837370 | 1.362503  |
| H  | 3.374696  | -0.161575 | 1.255833  |
| C  | 1.736166  | 2.200259  | 1.872642  |
| H  | 1.810289  | 2.682457  | 2.859143  |
| H  | 2.755645  | 1.962243  | 1.544356  |
| H  | 1.312999  | 2.920176  | 1.159144  |
| C  | -1.380846 | 2.174665  | 2.303836  |
| H  | -1.427710 | 2.469982  | 3.362398  |
| H  | -0.959375 | 3.010700  | 1.732731  |
| H  | -2.407574 | 2.009439  | 1.953872  |
| C  | -2.377494 | -0.871908 | 2.438289  |
| H  | -2.578449 | -1.105490 | 3.494093  |
| H  | -3.102291 | -0.110339 | 2.122888  |
| H  | -2.589517 | -1.774504 | 1.849081  |
| C  | 0.216468  | -2.716034 | 2.058633  |
| H  | 0.532543  | -3.063196 | 3.053884  |
| H  | -0.764119 | -3.159033 | 1.849380  |
| H  | 0.932249  | -3.122693 | 1.330930  |
| C  | -2.250535 | 3.582843  | -1.619936 |
| H  | -1.895492 | 4.606740  | -1.764042 |
| H  | -2.572796 | 3.157912  | -2.577501 |
| H  | -3.129958 | 3.588417  | -0.962759 |
| H  | 0.929719  | 1.266631  | -1.873572 |
| H  | 0.327486  | -1.723382 | -2.204077 |
| H  | -0.636908 | -0.300490 | -2.780759 |
| C  | 2.456890  | -0.169458 | -1.395226 |
| C  | 3.410343  | 0.851458  | -1.254309 |
| C  | 2.910298  | -1.496676 | -1.384486 |
| C  | 4.762332  | 0.560666  | -1.126396 |
| H  | 3.063352  | 1.886799  | -1.249081 |
| C  | 4.264267  | -1.787299 | -1.264592 |
| H  | 2.195829  | -2.317791 | -1.472498 |
| C  | 5.198684  | -0.762782 | -1.136660 |
| H  | 5.482153  | 1.371831  | -1.025299 |
| H  | 4.592932  | -2.825970 | -1.272413 |
| H  | 6.258755  | -0.993829 | -1.047885 |
| O  | -2.618473 | 1.002383  | -1.219975 |

|   |           |          |           |
|---|-----------|----------|-----------|
| C | -1.129575 | 2.780853 | -0.999533 |
| O | -0.064160 | 3.309841 | -0.652535 |

### D'

E = -1322.6103484au

|    |           |           |           |
|----|-----------|-----------|-----------|
| Rh | -0.091484 | 0.528228  | -0.022382 |
| C  | 0.536129  | 2.199636  | -1.451596 |
| C  | 0.233229  | 0.913438  | -2.072162 |
| C  | -1.179106 | 0.645023  | -1.934321 |
| C  | -0.624652 | 2.624876  | -0.804798 |
| C  | -1.683251 | 1.632403  | -1.054784 |
| C  | 3.537576  | -2.958880 | -1.333499 |
| C  | 4.341801  | -2.151008 | -0.535286 |
| C  | 3.762931  | -1.434840 | 0.504084  |
| C  | 2.395961  | -1.526269 | 0.754616  |
| C  | 1.562745  | -2.321503 | -0.042676 |
| C  | 2.173305  | -3.032051 | -1.082553 |
| H  | 3.971521  | -3.529739 | -2.152817 |
| H  | 5.412585  | -2.079689 | -0.718346 |
| H  | 4.361661  | -0.796119 | 1.151408  |
| H  | 1.544353  | -3.664241 | -1.712882 |
| O  | 1.894062  | -0.805672 | 1.823248  |
| N  | 1.386470  | 0.443263  | 1.356532  |
| C  | 1.932610  | 1.519027  | 1.998564  |
| C  | 2.957089  | 1.266396  | 3.078966  |
| H  | 2.595624  | 0.540001  | 3.814886  |
| H  | 3.884514  | 0.857794  | 2.659449  |
| H  | 3.174252  | 2.221165  | 3.565607  |
| O  | 1.567296  | 2.659452  | 1.712921  |
| C  | -0.675274 | -1.338768 | 0.809695  |
| C  | -2.151917 | -1.459000 | 0.857570  |
| C  | -2.853180 | -0.684830 | 1.801498  |
| C  | -2.912606 | -2.304542 | 0.036748  |
| C  | -4.234438 | -0.727574 | 1.901924  |
| H  | -2.276807 | -0.031302 | 2.460605  |
| C  | -4.302841 | -2.347120 | 0.132183  |
| H  | -2.417661 | -2.951845 | -0.687156 |
| C  | -4.974148 | -1.557613 | 1.058400  |
| H  | -4.741275 | -0.114267 | 2.646325  |
| H  | -4.863746 | -3.016267 | -0.519908 |
| H  | -6.059385 | -1.597702 | 1.134694  |
| C  | 0.072060  | -2.480463 | 0.146098  |
| C  | -3.085245 | 1.779561  | -0.582933 |
| H  | -3.622225 | 2.515508  | -1.201250 |

|   |           |           |           |
|---|-----------|-----------|-----------|
| H | -3.634941 | 0.832376  | -0.627719 |
| H | -3.121442 | 2.134314  | 0.455555  |
| C | -0.794193 | 3.813276  | 0.070504  |
| H | -1.757920 | 4.307376  | -0.113246 |
| H | -0.742721 | 3.521938  | 1.128933  |
| H | 0.006179  | 4.543437  | -0.086316 |
| C | 1.882958  | 2.832458  | -1.433713 |
| H | 2.100009  | 3.336738  | -2.387015 |
| H | 1.971302  | 3.550453  | -0.613176 |
| H | 2.664788  | 2.077061  | -1.274185 |
| C | 1.206098  | 0.113144  | -2.861103 |
| H | 1.311213  | 0.523322  | -3.877500 |
| H | 2.198563  | 0.121332  | -2.392337 |
| H | 0.894142  | -0.934291 | -2.948008 |
| C | -1.942745 | -0.444156 | -2.598757 |
| H | -2.355766 | -0.099063 | -3.558067 |
| H | -1.310416 | -1.316346 | -2.810683 |
| H | -2.777396 | -0.789572 | -1.976908 |
| H | -0.349411 | -2.665481 | -0.856172 |
| H | -0.115560 | -3.417499 | 0.707812  |
| H | -0.308781 | -1.206443 | 1.834510  |

**TS<sub>D'</sub>-D1'**

E = -1322.5466393au

|    |           |           |           |
|----|-----------|-----------|-----------|
| N  | 1.512257  | -0.888948 | -0.824384 |
| C  | -0.845954 | -2.614144 | 1.115700  |
| C  | -1.669731 | -1.599527 | 1.713525  |
| C  | -2.434540 | -0.972488 | 0.674128  |
| C  | -2.062910 | -1.560990 | -0.576052 |
| C  | -1.083414 | -2.569174 | -0.299502 |
| Rh | -0.178429 | -0.638482 | 0.344855  |
| C  | 0.840374  | 1.280515  | 0.793678  |
| H  | 0.476824  | 1.773291  | 1.700075  |
| C  | 0.008598  | 1.411012  | -0.360073 |
| H  | 0.490230  | 1.322765  | -1.333772 |
| H  | 0.835388  | -0.237549 | 1.537763  |
| C  | 3.185528  | 0.325228  | 0.244891  |
| C  | 2.331362  | 1.337506  | 0.713525  |
| C  | 4.571637  | 0.489877  | 0.283250  |
| C  | 2.932397  | 2.503264  | 1.206618  |
| C  | 5.133688  | 1.657050  | 0.773876  |
| H  | 5.185405  | -0.328915 | -0.088912 |
| C  | 4.307685  | 2.678708  | 1.235542  |
| H  | 2.280866  | 3.294194  | 1.581293  |

|   |           |           |           |
|---|-----------|-----------|-----------|
| H | 6.216138  | 1.771292  | 0.789158  |
| H | 4.731001  | 3.603874  | 1.621447  |
| C | -3.520646 | 0.021604  | 0.878847  |
| H | -3.603054 | 0.724348  | 0.041102  |
| H | -4.488323 | -0.493139 | 0.978067  |
| H | -3.369572 | 0.613735  | 1.789351  |
| C | -2.606622 | -1.236573 | -1.924333 |
| H | -3.292441 | -2.020864 | -2.278674 |
| H | -3.161919 | -0.290291 | -1.914707 |
| H | -1.786272 | -1.136443 | -2.647074 |
| C | -1.793866 | -1.305565 | 3.170675  |
| H | -1.959422 | -0.235378 | 3.350576  |
| H | -2.640307 | -1.848833 | 3.616370  |
| H | -0.888618 | -1.592732 | 3.718686  |
| C | 0.061061  | -3.573939 | 1.809060  |
| H | 0.323557  | -3.225983 | 2.815309  |
| H | -0.400194 | -4.567912 | 1.910245  |
| H | 1.001492  | -3.696475 | 1.256603  |
| C | -0.460496 | -3.467743 | -1.308736 |
| H | 0.536984  | -3.794212 | -0.991730 |
| H | -1.079570 | -4.367027 | -1.446039 |
| H | -0.358087 | -2.964635 | -2.276595 |
| C | 2.928703  | -0.820674 | -2.828950 |
| H | 3.513025  | -1.694837 | -2.519170 |
| H | 2.785984  | -0.829970 | -3.912836 |
| H | 3.508322  | 0.068692  | -2.547624 |
| O | 2.773713  | -0.898699 | -0.204346 |
| C | 1.563375  | -0.803413 | -2.177067 |
| O | 0.528945  | -0.723129 | -2.846399 |
| C | -1.248226 | 2.167480  | -0.390401 |
| C | -1.888228 | 2.325202  | -1.629894 |
| C | -1.828723 | 2.773948  | 0.731675  |
| C | -3.060487 | 3.060844  | -1.743183 |
| H | -1.444157 | 1.851130  | -2.507030 |
| C | -2.996287 | 3.518590  | 0.616559  |
| H | -1.365268 | 2.663024  | 1.713059  |
| C | -3.619795 | 3.666258  | -0.619232 |
| H | -3.535856 | 3.171000  | -2.716916 |
| H | -3.423580 | 3.987786  | 1.502029  |
| H | -4.533254 | 4.251875  | -0.706635 |

**D1'**

E = -1322.5988705au

|   |           |           |          |
|---|-----------|-----------|----------|
| N | -1.489695 | -0.838930 | 0.935054 |
|---|-----------|-----------|----------|



|    |           |           |           |
|----|-----------|-----------|-----------|
| C  | 0.774837  | -2.632090 | -1.066736 |
| C  | 1.541132  | -1.629167 | -1.768916 |
| C  | 2.352240  | -0.954168 | -0.804841 |
| C  | 2.092388  | -1.515924 | 0.490335  |
| C  | 1.130331  | -2.552488 | 0.322660  |
| Rh | 0.083714  | -0.664715 | -0.379019 |
| C  | -0.832889 | 1.287232  | -0.749467 |
| H  | -0.458522 | 1.680030  | -1.698576 |
| C  | 0.005628  | 1.435403  | 0.371610  |
| H  | -0.438469 | 1.327259  | 1.360045  |
| C  | -3.182389 | 0.362912  | -0.122246 |
| C  | -2.320698 | 1.318763  | -0.690387 |
| C  | -4.568560 | 0.531990  | -0.170068 |
| C  | -2.927813 | 2.423123  | -1.309098 |
| C  | -5.130080 | 1.639965  | -0.780662 |
| H  | -5.183235 | -0.241677 | 0.287281  |
| C  | -4.301569 | 2.598890  | -1.358664 |
| H  | -2.275223 | 3.169736  | -1.764263 |
| H  | -6.212257 | 1.755661  | -0.803098 |
| H  | -4.722305 | 3.476695  | -1.845065 |
| C  | 3.401634  | 0.049016  | -1.122157 |
| H  | 3.594427  | 0.732543  | -0.287609 |
| H  | 4.347323  | -0.464896 | -1.353064 |
| H  | 3.139446  | 0.657199  | -1.996447 |
| C  | 2.737801  | -1.147289 | 1.780593  |
| H  | 3.463322  | -1.912029 | 2.096069  |
| H  | 3.273386  | -0.193394 | 1.703912  |
| H  | 1.976137  | -1.044608 | 2.564851  |
| C  | 1.595367  | -1.420594 | -3.245169 |
| H  | 1.759489  | -0.364255 | -3.494354 |
| H  | 2.415335  | -1.996763 | -3.700011 |
| H  | 0.662627  | -1.727493 | -3.732228 |
| C  | -0.118756 | -3.664009 | -1.669063 |
| H  | -0.475509 | -3.358921 | -2.659643 |
| H  | 0.403732  | -4.625891 | -1.780905 |
| H  | -1.004428 | -3.836073 | -1.045100 |
| C  | 0.590509  | -3.417633 | 1.405823  |
| H  | -0.426330 | -3.756239 | 1.174719  |
| H  | 1.221147  | -4.309644 | 1.536203  |
| H  | 0.550961  | -2.872982 | 2.355541  |
| C  | -2.719142 | -0.664197 | 3.049636  |
| H  | -3.348630 | -1.532342 | 2.823672  |
| H  | -2.482803 | -0.638430 | 4.116680  |
| H  | -3.298891 | 0.229788  | 2.783319  |

|   |           |           |           |
|---|-----------|-----------|-----------|
| O | -2.797018 | -0.824031 | 0.435482  |
| C | -1.415653 | -0.707472 | 2.283318  |
| O | -0.325417 | -0.630362 | 2.859816  |
| C | 1.281730  | 2.160704  | 0.382490  |
| C | 1.987266  | 2.230397  | 1.593810  |
| C | 1.799099  | 2.845588  | -0.724965 |
| C | 3.174027  | 2.944798  | 1.690399  |
| H | 1.586028  | 1.700108  | 2.459381  |
| C | 2.982930  | 3.566727  | -0.626174 |
| H | 1.265665  | 2.825990  | -1.675671 |
| C | 3.678619  | 3.617371  | 0.578702  |
| H | 3.704566  | 2.984415  | 2.640742  |
| H | 3.362889  | 4.098690  | -1.497418 |
| H | 4.604054  | 4.185813  | 0.653796  |
| H | -1.011654 | -0.775539 | -1.519260 |

**TS<sub>D1'</sub>-E'**

**E = -1322.5762887au**

|    |           |           |           |
|----|-----------|-----------|-----------|
| N  | 1.643287  | -0.435192 | -1.241953 |
| C  | -1.234961 | -2.579078 | 0.026890  |
| C  | -0.146420 | -2.610905 | 1.000132  |
| C  | -0.438731 | -1.675397 | 2.032515  |
| C  | -1.611004 | -0.959360 | 1.616969  |
| C  | -2.148913 | -1.599350 | 0.423618  |
| Rh | -0.005259 | -0.519662 | 0.174313  |
| C  | 0.363106  | 1.573257  | 0.562957  |
| H  | -0.151644 | 1.862127  | 1.485699  |
| C  | -0.414107 | 1.477449  | -0.619561 |
| H  | 0.121558  | 1.477962  | -1.568505 |
| H  | 1.597465  | -0.633415 | 0.250472  |
| C  | 0.312726  | -1.455463 | 3.302671  |
| H  | 0.394589  | -0.387132 | 3.545217  |
| H  | -0.181567 | -1.949193 | 4.153470  |
| H  | 1.333580  | -1.850585 | 3.238016  |
| C  | -2.344998 | 0.039677  | 2.444493  |
| H  | -3.052874 | -0.467349 | 3.118026  |
| H  | -1.663856 | 0.628525  | 3.073031  |
| H  | -2.923273 | 0.737464  | 1.825329  |
| C  | -3.442921 | -1.239059 | -0.214156 |
| H  | -4.287494 | -1.712666 | 0.309642  |
| H  | -3.618158 | -0.155003 | -0.198282 |
| H  | -3.482425 | -1.556316 | -1.263508 |
| C  | -1.321107 | -3.489236 | -1.148844 |
| H  | -1.527623 | -4.522002 | -0.827989 |

|   |           |           |           |   |           |           |           |
|---|-----------|-----------|-----------|---|-----------|-----------|-----------|
| H | -2.122640 | -3.189450 | -1.834417 | C | 0.496945  | 1.532559  | 0.484891  |
| H | -0.374264 | -3.494991 | -1.703252 | H | 0.077926  | 1.859357  | 1.442502  |
| C | 0.931402  | -3.641354 | 1.015440  | C | -0.405831 | 1.445801  | -0.626198 |
| H | 0.540665  | -4.600118 | 1.390350  | H | 0.035160  | 1.523469  | -1.623115 |
| H | 1.336891  | -3.797580 | 0.010735  | H | 2.451934  | -1.095004 | -0.882694 |
| H | 1.762035  | -3.345744 | 1.668554  | C | 0.924610  | -1.297813 | 3.251711  |
| C | 2.684959  | 1.498938  | -0.440570 | H | 1.093441  | -0.214557 | 3.337995  |
| C | 1.803931  | 1.877011  | 0.589946  | H | 0.525210  | -1.645529 | 4.217257  |
| C | 4.032977  | 1.820647  | -0.401575 | H | 1.907587  | -1.766439 | 3.118164  |
| C | 2.356539  | 2.555235  | 1.680422  | C | -1.898663 | 0.026085  | 2.766074  |
| C | 4.548813  | 2.528155  | 0.681622  | H | -2.448153 | -0.497997 | 3.563546  |
| H | 4.661776  | 1.514871  | -1.236127 | H | -1.162073 | 0.676907  | 3.256708  |
| C | 3.707638  | 2.882809  | 1.729882  | H | -2.614843 | 0.665259  | 2.235843  |
| H | 1.696710  | 2.847495  | 2.498579  | C | -3.283486 | -1.325185 | 0.270886  |
| H | 5.605128  | 2.788574  | 0.707647  | H | -4.043026 | -1.791398 | 0.917303  |
| H | 4.100851  | 3.423299  | 2.589104  | H | -3.478868 | -0.244247 | 0.265004  |
| C | 3.292043  | -1.133569 | -2.927306 | H | -3.447528 | -1.688705 | -0.751571 |
| H | 4.166495  | -0.745767 | -2.390082 | C | -1.236896 | -3.565869 | -0.850505 |
| H | 3.563488  | -2.052968 | -3.452495 | H | -1.376051 | -4.585334 | -0.457585 |
| H | 2.990376  | -0.364845 | -3.646943 | H | -2.131770 | -3.312289 | -1.432257 |
| C | -1.823699 | 1.871294  | -0.752823 | H | -0.385620 | -3.602340 | -1.545098 |
| C | -2.502507 | 1.524534  | -1.931336 | C | 1.349853  | -3.479170 | 0.894405  |
| C | -2.512254 | 2.634480  | 0.199074  | H | 1.139010  | -4.488235 | 1.279999  |
| C | -3.818456 | 1.908742  | -2.145923 | H | 1.590016  | -3.584896 | -0.172313 |
| H | -1.973874 | 0.930452  | -2.678899 | H | 2.247022  | -3.112609 | 1.410940  |
| C | -3.835132 | 3.013449  | -0.010336 | C | 2.752785  | 1.371148  | -0.671531 |
| H | -1.998062 | 2.959093  | 1.103723  | C | 1.936711  | 1.780512  | 0.398592  |
| C | -4.495350 | 2.652496  | -1.180990 | C | 4.119437  | 1.605781  | -0.704807 |
| H | -4.321014 | 1.625162  | -3.069583 | C | 2.597777  | 2.428320  | 1.454080  |
| H | -4.347952 | 3.610926  | 0.742280  | C | 4.734008  | 2.284608  | 0.342047  |
| H | -5.527220 | 2.957533  | -1.346039 | H | 4.681936  | 1.254071  | -1.568258 |
| O | 2.212780  | 0.832758  | -1.551778 | C | 3.962996  | 2.682604  | 1.430170  |
| C | 2.177685  | -1.463731 | -1.965061 | H | 2.002298  | 2.755784  | 2.307396  |
| O | 1.748270  | -2.604918 | -1.829855 | H | 5.802545  | 2.486590  | 0.311740  |

### E'

$$E = -1322.6209908\text{au}$$

|    |           |           |           |   |           |           |           |
|----|-----------|-----------|-----------|---|-----------|-----------|-----------|
| N  | 1.686156  | -0.570890 | -1.324056 | C | 0.594239  | -0.555162 | -3.563134 |
| C  | -1.012040 | -2.593125 | 0.254231  | H | 1.371511  | 0.013482  | -4.089414 |
| C  | 0.187195  | -2.566584 | 1.092339  | H | 0.128890  | -1.263692 | -4.252660 |
| C  | 0.004324  | -1.624606 | 2.124116  | H | -0.145456 | 0.164085  | -3.198129 |
| C  | -1.246077 | -0.950722 | 1.849169  | C | -1.811517 | 1.881513  | -0.580979 |
| C  | -1.906983 | -1.629211 | 0.748938  | C | -2.654965 | 1.568858  | -1.658965 |
| Rh | 0.010419  | -0.501876 | 0.138088  | C | -2.364766 | 2.611985  | 0.479327  |
|    |           |           |           | C | -3.987742 | 1.954532  | -1.675372 |
|    |           |           |           | H | -2.246278 | 0.990400  | -2.490495 |

|   |           |           |           |
|---|-----------|-----------|-----------|
| C | -3.703835 | 2.991547  | 0.471316  |
| H | -1.731508 | 2.907189  | 1.315693  |
| C | -4.524594 | 2.666469  | -0.603975 |
| H | -4.614021 | 1.694694  | -2.528058 |
| H | -4.103806 | 3.561873  | 1.309083  |
| H | -5.569869 | 2.970349  | -0.611872 |
| O | 2.221964  | 0.686041  | -1.758936 |
| C | 1.213132  | -1.327907 | -2.445196 |
| O | 1.368678  | -2.530271 | -2.427014 |

### TS<sub>E',F'</sub>

E = -1322.5919802au

|    |           |           |           |
|----|-----------|-----------|-----------|
| N  | 2.402140  | -0.525127 | -1.671954 |
| C  | -1.065419 | -2.555263 | 0.346644  |
| C  | 0.155434  | -2.496044 | 1.156727  |
| C  | -0.021387 | -1.572013 | 2.204508  |
| C  | -1.276521 | -0.900640 | 1.931959  |
| C  | -1.960380 | -1.608722 | 0.844866  |
| Rh | -0.073179 | -0.426991 | 0.253128  |
| C  | 0.393545  | 1.632882  | 0.406909  |
| H  | -0.059717 | 2.053972  | 1.310939  |
| C  | -0.475036 | 1.397345  | -0.706773 |
| H  | -0.008768 | 1.253339  | -1.687013 |
| H  | 3.391636  | -0.771552 | -1.680439 |
| C  | 0.921997  | -1.266558 | 3.316923  |
| H  | 0.904614  | -0.199276 | 3.576994  |
| H  | 0.683089  | -1.830651 | 4.232301  |
| H  | 1.956783  | -1.508922 | 3.042025  |
| C  | -1.933024 | 0.116092  | 2.799197  |
| H  | -2.618605 | -0.365656 | 3.513640  |
| H  | -1.199878 | 0.690448  | 3.379935  |
| H  | -2.524256 | 0.823905  | 2.201937  |
| C  | -3.341096 | -1.309671 | 0.381139  |
| H  | -4.094607 | -1.754458 | 1.049774  |
| H  | -3.527318 | -0.227697 | 0.354277  |
| H  | -3.518660 | -1.688878 | -0.632709 |
| C  | -1.271764 | -3.436066 | -0.842588 |
| H  | -2.337261 | -3.648817 | -0.994982 |
| H  | -0.905369 | -2.964995 | -1.768570 |
| H  | -0.762537 | -4.403409 | -0.728115 |
| C  | 1.344333  | -3.373547 | 0.956146  |
| H  | 1.294349  | -4.275872 | 1.584728  |
| H  | 1.420624  | -3.713974 | -0.084544 |
| H  | 2.277372  | -2.850104 | 1.205723  |

|   |           |           |           |
|---|-----------|-----------|-----------|
| C | 2.708806  | 1.521168  | -0.688739 |
| C | 1.838708  | 1.874225  | 0.358201  |
| C | 4.065906  | 1.813793  | -0.661801 |
| C | 2.447365  | 2.510251  | 1.456617  |
| C | 4.630028  | 2.454585  | 0.434699  |
| H | 4.666926  | 1.541519  | -1.530058 |
| C | 3.804599  | 2.791477  | 1.504052  |
| H | 1.810434  | 2.798892  | 2.293913  |
| H | 5.691970  | 2.690315  | 0.450648  |
| H | 4.218738  | 3.291997  | 2.378085  |
| C | 2.094598  | -2.715913 | -2.613247 |
| H | 2.902558  | -2.975306 | -1.918514 |
| H | 1.278515  | -3.437929 | -2.505500 |
| H | 2.475341  | -2.798533 | -3.639210 |
| C | -1.889625 | 1.782519  | -0.774669 |
| C | -2.657232 | 1.298652  | -1.847243 |
| C | -2.527206 | 2.597624  | 0.170748  |
| C | -4.004637 | 1.607149  | -1.964053 |
| H | -2.166879 | 0.655134  | -2.580890 |
| C | -3.881721 | 2.900209  | 0.057817  |
| H | -1.949274 | 3.023651  | 0.991292  |
| C | -4.628567 | 2.408925  | -1.008114 |
| H | -4.575893 | 1.219460  | -2.806952 |
| H | -4.351944 | 3.541495  | 0.802861  |
| H | -5.685654 | 2.653526  | -1.098838 |
| O | 2.241233  | 0.856334  | -1.826899 |
| C | 1.547521  | -1.324399 | -2.410615 |
| O | 0.468320  | -0.958771 | -2.830062 |

### F'

E = -1322.607538au

|    |           |           |           |
|----|-----------|-----------|-----------|
| N  | -2.914194 | -0.728839 | -2.235922 |
| C  | 1.170545  | 2.647836  | -0.229032 |
| C  | 0.063563  | 2.744776  | 0.722923  |
| C  | 0.352417  | 1.944050  | 1.841963  |
| C  | 1.572872  | 1.220816  | 1.526185  |
| C  | 2.125967  | 1.764977  | 0.291613  |
| Rh | 0.168235  | 0.572818  | 0.054419  |
| C  | -0.324220 | -1.391914 | 0.694306  |
| H  | 0.212576  | -1.580366 | 1.630679  |
| C  | 0.460441  | -1.450002 | -0.503749 |
| H  | -0.069581 | -1.562220 | -1.451712 |
| H  | -3.420376 | -1.127876 | -3.018762 |
| C  | -0.449859 | 1.795551  | 3.089022  |

|   |           |           |           |
|---|-----------|-----------|-----------|
| H | -0.397389 | 0.770820  | 3.480743  |
| H | -0.098162 | 2.466776  | 3.888523  |
| H | -1.511385 | 2.014492  | 2.915114  |
| C | 2.332373  | 0.365101  | 2.481883  |
| H | 2.973547  | 0.981423  | 3.131310  |
| H | 1.663604  | -0.209239 | 3.137047  |
| H | 2.980553  | -0.348622 | 1.957448  |
| C | 3.445611  | 1.386254  | -0.281997 |
| H | 4.271470  | 1.906921  | 0.227500  |
| H | 3.631009  | 0.307610  | -0.185726 |
| H | 3.508314  | 1.627142  | -1.351024 |
| C | 1.224605  | 3.402706  | -1.512705 |
| H | 1.293396  | 4.488653  | -1.343107 |
| H | 2.089680  | 3.106112  | -2.117903 |
| H | 0.323797  | 3.226957  | -2.117798 |
| C | -1.121392 | 3.627196  | 0.527444  |
| H | -0.873054 | 4.684436  | 0.710115  |
| H | -1.505021 | 3.558549  | -0.499389 |
| H | -1.942350 | 3.358422  | 1.203425  |
| C | -2.733519 | -1.687490 | -0.142017 |
| C | -1.767297 | -1.585187 | 0.870001  |
| C | -4.089005 | -1.822927 | 0.119410  |
| C | -2.271294 | -1.649288 | 2.184946  |
| C | -4.548417 | -1.858372 | 1.429181  |
| H | -4.779671 | -1.899620 | -0.719219 |
| C | -3.621901 | -1.774217 | 2.466660  |
| H | -1.554697 | -1.580432 | 3.005263  |
| H | -5.611709 | -1.963179 | 1.635106  |
| H | -3.954811 | -1.809231 | 3.502840  |
| C | -2.868528 | 1.370790  | -3.420371 |
| H | -3.082193 | 2.349093  | -2.977052 |
| H | -2.119754 | 1.521560  | -4.206966 |
| H | -3.786490 | 0.977240  | -3.871087 |
| C | 1.855807  | -1.911921 | -0.552783 |
| C | 2.586401  | -1.732683 | -1.739564 |
| C | 2.511259  | -2.532686 | 0.520101  |
| C | 3.908883  | -2.138026 | -1.846039 |
| H | 2.092536  | -1.244405 | -2.582302 |
| C | 3.841198  | -2.930275 | 0.419490  |
| H | 1.964088  | -2.727356 | 1.442562  |
| C | 4.550138  | -2.735985 | -0.761966 |
| H | 4.446720  | -1.983811 | -2.781158 |
| H | 4.322258  | -3.412954 | 1.269948  |
| H | 5.588351  | -3.054187 | -0.841352 |

|   |           |           |           |
|---|-----------|-----------|-----------|
| O | -2.294491 | -1.696928 | -1.474092 |
| C | -2.289461 | 0.479491  | -2.356549 |
| O | -1.371705 | 0.845792  | -1.638484 |

**TS<sub>F'-G'</sub>**

**E = -1322.570443au**

|    |           |           |           |
|----|-----------|-----------|-----------|
| N  | -1.850325 | -0.013156 | -2.686450 |
| C  | 1.578071  | 2.344244  | 0.566484  |
| C  | 0.283230  | 2.616982  | 1.172379  |
| C  | 0.021522  | 1.617922  | 2.133709  |
| C  | 1.122041  | 0.671189  | 2.072117  |
| C  | 2.127125  | 1.187961  | 1.170726  |
| Rh | 0.177929  | 0.612302  | 0.125413  |
| C  | -0.708478 | -1.372680 | 0.396602  |
| H  | -0.280523 | -1.795995 | 1.310999  |
| C  | 0.187264  | -1.329221 | -0.713427 |
| H  | -0.252365 | -1.230040 | -1.706672 |
| H  | -2.608360 | 0.028009  | -3.368946 |
| C  | -1.183315 | 1.499894  | 3.003484  |
| H  | -1.421552 | 0.450204  | 3.220169  |
| H  | -1.045655 | 2.011064  | 3.968794  |
| H  | -2.069257 | 1.930369  | 2.519469  |
| C  | 1.340979  | -0.465593 | 3.011080  |
| H  | 1.930234  | -0.140307 | 3.881863  |
| H  | 0.395250  | -0.871797 | 3.392992  |
| H  | 1.894265  | -1.284266 | 2.530916  |
| C  | 3.449485  | 0.556086  | 0.916046  |
| H  | 4.169256  | 0.788246  | 1.716003  |
| H  | 3.361437  | -0.538480 | 0.858035  |
| H  | 3.883009  | 0.893563  | -0.033456 |
| C  | 2.187275  | 3.187084  | -0.497672 |
| H  | 1.458262  | 3.392240  | -1.292822 |
| H  | 2.527477  | 4.155595  | -0.100761 |
| H  | 3.048354  | 2.691356  | -0.961428 |
| C  | -0.579723 | 3.776449  | 0.811490  |
| H  | -1.593487 | 3.665497  | 1.214022  |
| H  | -0.168288 | 4.720679  | 1.200308  |
| H  | -0.666950 | 3.881377  | -0.277991 |
| C  | -3.059624 | -0.740071 | -0.444684 |
| C  | -2.157074 | -1.428206 | 0.425292  |
| C  | -4.438382 | -1.068829 | -0.431173 |
| C  | -2.748317 | -2.238096 | 1.420643  |
| C  | -4.966016 | -1.906517 | 0.523887  |
| H  | -5.071586 | -0.554390 | -1.152592 |

|   |           |           |           |
|---|-----------|-----------|-----------|
| C | -4.106331 | -2.480294 | 1.474569  |
| H | -2.088702 | -2.724881 | 2.141210  |
| H | -6.035469 | -2.106907 | 0.555102  |
| H | -4.505703 | -3.141324 | 2.242392  |
| C | -0.926843 | 1.756949  | -4.117293 |
| H | -1.649070 | 2.585112  | -4.102948 |
| H | 0.073500  | 2.180353  | -4.248547 |
| H | -1.164253 | 1.115521  | -4.974051 |
| C | 1.520486  | -1.955926 | -0.710411 |
| C | 2.407394  | -1.636999 | -1.752516 |
| C | 1.963993  | -2.858118 | 0.265937  |
| C | 3.680101  | -2.184301 | -1.811750 |
| H | 2.074635  | -0.927000 | -2.512734 |
| C | 3.245050  | -3.402856 | 0.211943  |
| H | 1.285785  | -3.164979 | 1.062090  |
| C | 4.110615  | -3.070921 | -0.824477 |
| H | 4.344401  | -1.918506 | -2.633382 |
| H | 3.560934  | -4.107181 | 0.980983  |
| H | 5.108569  | -3.503724 | -0.869598 |
| O | -2.711745 | 0.302622  | -1.155486 |
| C | -0.991855 | 1.016490  | -2.803755 |
| O | -0.250844 | 1.385299  | -1.871170 |

### G'

E = -1322.6532933au

|    |           |           |           |
|----|-----------|-----------|-----------|
| N  | -0.268541 | -0.477503 | 3.475584  |
| C  | -0.310614 | 2.693464  | -0.583629 |
| C  | 0.938514  | 2.339823  | -1.158215 |
| C  | 0.719850  | 1.229278  | -2.055490 |
| C  | -0.701498 | 0.965135  | -2.088722 |
| C  | -1.331029 | 1.818419  | -1.131996 |
| Rh | 0.108676  | 0.552388  | -0.084883 |
| C  | 0.416229  | -1.673533 | -0.535158 |
| H  | 0.059262  | -1.933608 | -1.539060 |
| C  | -0.529798 | -1.543247 | 0.481183  |
| H  | -0.186183 | -1.509372 | 1.522166  |
| C  | 1.779621  | 0.593803  | -2.886918 |
| H  | 1.458387  | -0.376137 | -3.284008 |
| H  | 2.051708  | 1.231618  | -3.740864 |
| H  | 2.687852  | 0.414559  | -2.296090 |
| C  | -1.407630 | 0.029535  | -3.002977 |
| H  | -1.819501 | 0.586335  | -3.857103 |
| H  | -0.737835 | -0.739211 | -3.406805 |
| H  | -2.243910 | -0.475817 | -2.503070 |

|   |           |           |           |
|---|-----------|-----------|-----------|
| C | -2.771768 | 1.873216  | -0.765257 |
| H | -3.249151 | 2.783226  | -1.157854 |
| H | -3.323706 | 1.007996  | -1.151283 |
| H | -2.882525 | 1.872329  | 0.327609  |
| C | -0.572444 | 3.706263  | 0.466686  |
| H | -1.350125 | 4.412409  | 0.144781  |
| H | -0.924226 | 3.186702  | 1.372623  |
| H | 0.328912  | 4.274157  | 0.723071  |
| C | 2.277082  | 2.861942  | -0.781355 |
| H | 2.900026  | 3.042123  | -1.666962 |
| H | 2.205012  | 3.796725  | -0.214710 |
| H | 2.787294  | 2.117324  | -0.147049 |
| C | 2.516613  | -0.939147 | 0.539878  |
| C | 1.852532  | -1.867607 | -0.293682 |
| C | 3.845244  | -1.209453 | 0.914893  |
| C | 2.545576  | -2.951119 | -0.835298 |
| C | 4.505010  | -2.312866 | 0.395377  |
| H | 4.346853  | -0.508208 | 1.580039  |
| C | 3.871822  | -3.184431 | -0.495123 |
| H | 2.019748  | -3.633997 | -1.505771 |
| H | 5.544301  | -2.488607 | 0.672722  |
| H | 4.404842  | -4.038776 | -0.907149 |
| C | 0.853174  | 1.739624  | 3.423909  |
| H | 0.309279  | 2.684069  | 3.560239  |
| H | 1.337439  | 1.471732  | 4.370876  |
| H | 1.630138  | 1.901814  | 2.663677  |
| C | -1.977232 | -1.734386 | 0.317409  |
| C | -2.822394 | -1.332483 | 1.363809  |
| C | -2.547309 | -2.338777 | -0.812091 |
| C | -4.198325 | -1.485923 | 1.252681  |
| H | -2.366378 | -0.896542 | 2.252766  |
| C | -3.925354 | -2.490494 | -0.918763 |
| H | -1.905605 | -2.720233 | -1.607043 |
| C | -4.756848 | -2.052777 | 0.109187  |
| H | -4.841842 | -1.165742 | 2.070959  |
| H | -4.350402 | -2.968503 | -1.800522 |
| H | -5.836044 | -2.174103 | 0.027423  |
| O | 1.924021  | 0.185257  | 0.885261  |
| C | -0.081595 | 0.667404  | 2.915071  |
| O | -0.734627 | 0.997620  | 1.821086  |
| H | 0.295990  | -0.542216 | 4.323786  |

### G1'

E = -1551.6411484au



|   |           |           |           |
|---|-----------|-----------|-----------|
| H | -4.391363 | -1.445643 | 0.222635  |
| C | -3.760235 | 1.074194  | -0.939460 |
| H | -4.643478 | 1.028082  | -1.593579 |
| H | -4.056787 | 0.856107  | 0.096268  |
| H | -3.365584 | 2.097014  | -0.968176 |
| C | -1.090473 | 1.740422  | -2.512508 |
| H | -1.692692 | 2.065067  | -3.373708 |
| H | -1.234546 | 2.475938  | -1.711373 |
| H | -0.035504 | 1.774425  | -2.808962 |
| C | -0.324044 | 2.203823  | 0.809894  |
| C | -1.489058 | 2.914636  | 1.120144  |
| C | 0.711094  | 2.824313  | 0.080400  |
| C | -1.638114 | 4.235691  | 0.724130  |
| C | 0.525204  | 4.156334  | -0.317621 |
| C | -0.623765 | 4.865139  | 0.001303  |
| H | -2.549641 | 4.776737  | 0.975037  |
| H | 1.318888  | 4.634953  | -0.893169 |
| H | -0.732263 | 5.900798  | -0.316135 |
| O | -0.322203 | 0.893829  | 1.156707  |
| C | 1.529117  | -1.483337 | 1.234394  |
| O | 0.826588  | -1.637125 | 0.190364  |
| O | 1.417497  | -0.537680 | 2.059239  |
| H | 0.528019  | 0.360700  | 1.593903  |
| C | 2.607928  | -2.508681 | 1.464837  |
| H | 3.139250  | -2.311118 | 2.400248  |
| H | 2.167828  | -3.512164 | 1.485478  |
| H | 3.320357  | -2.474106 | 0.630518  |
| N | -3.327194 | -0.114375 | 2.081246  |
| C | -2.287571 | -1.528526 | 3.838997  |
| H | -1.301064 | -1.234259 | 4.219456  |
| H | -3.061859 | -1.156680 | 4.520355  |
| H | -2.312992 | -2.624681 | 3.829950  |
| C | -2.444755 | -0.993507 | 2.431400  |
| O | -1.573722 | -1.529791 | 1.627410  |
| H | -3.885172 | 0.135739  | 2.897348  |
| H | -2.269525 | 2.367059  | 1.650609  |
| C | 1.918449  | 2.101693  | -0.342109 |
| H | 2.159931  | 2.150848  | -1.410038 |
| C | 2.730071  | 1.436740  | 0.491558  |
| H | 2.524563  | 1.488853  | 1.561842  |
| C | 3.879531  | 0.610840  | 0.128778  |
| C | 4.794658  | 0.246949  | 1.125284  |
| C | 4.077601  | 0.113095  | -1.166807 |
| C | 5.887065  | -0.560485 | 0.834777  |

|   |          |           |           |
|---|----------|-----------|-----------|
| H | 4.629803 | 0.602221  | 2.142988  |
| C | 5.167053 | -0.696356 | -1.458464 |
| H | 3.351601 | 0.343671  | -1.946588 |
| C | 6.078834 | -1.034509 | -0.459512 |
| H | 6.587214 | -0.828512 | 1.624566  |
| H | 5.301342 | -1.078448 | -2.469547 |
| H | 6.929482 | -1.674091 | -0.689232 |

## H'

E = -936.1612294au

|    |           |           |           |
|----|-----------|-----------|-----------|
| C  | -1.318979 | -0.972527 | 1.207293  |
| C  | -1.947586 | 0.308511  | 0.932621  |
| C  | -2.175648 | 0.389121  | -0.470390 |
| C  | -1.672551 | -0.829253 | -1.081448 |
| C  | -1.187928 | -1.680864 | -0.029673 |
| Rh | -0.068441 | 0.168822  | -0.114955 |
| C  | -2.727074 | 1.545506  | -1.225081 |
| H  | -2.093563 | 1.785050  | -2.088367 |
| H  | -3.738708 | 1.325718  | -1.594599 |
| H  | -2.778750 | 2.445161  | -0.602414 |
| C  | -1.702475 | -1.153248 | -2.532898 |
| H  | -2.603994 | -1.725838 | -2.796026 |
| H  | -1.692514 | -0.242713 | -3.143495 |
| H  | -0.827370 | -1.748602 | -2.820047 |
| C  | -0.607363 | -3.039287 | -0.191624 |
| H  | -1.386426 | -3.805421 | -0.065113 |
| H  | -0.164848 | -3.165736 | -1.186756 |
| H  | 0.188647  | -3.198678 | 0.543989  |
| C  | -0.858612 | -1.462241 | 2.532221  |
| H  | -1.391553 | -2.381157 | 2.815319  |
| H  | 0.219340  | -1.680032 | 2.470743  |
| H  | -1.023053 | -0.715015 | 3.316371  |
| C  | -2.226273 | 1.351456  | 1.956896  |
| H  | -3.091824 | 1.078666  | 2.577176  |
| H  | -1.361116 | 1.482797  | 2.618771  |
| H  | -2.434697 | 2.322719  | 1.494419  |
| C  | 1.320601  | 2.288225  | 0.040483  |
| O  | 0.648928  | 2.047732  | -1.007138 |
| O  | 1.199119  | 1.533935  | 1.049495  |
| C  | 2.282975  | 3.435548  | 0.067900  |
| H  | 1.947023  | 4.236551  | -0.597646 |
| H  | 2.410050  | 3.809499  | 1.088302  |
| H  | 3.258173  | 3.083066  | -0.290618 |
| N  | 2.093705  | -1.742939 | 1.094433  |

|   |          |           |           |
|---|----------|-----------|-----------|
| C | 3.845648 | -1.501745 | -0.649930 |
| H | 4.350290 | -0.536246 | -0.778091 |
| H | 4.473420 | -2.152696 | -0.030452 |
| H | 3.747279 | -1.943577 | -1.648988 |
| C | 2.473638 | -1.277814 | -0.049578 |
| O | 1.722546 | -0.558948 | -0.833609 |
| H | 2.863118 | -2.260012 | 1.518703  |

## 2b

E = -615.4472406au

|   |           |           |           |
|---|-----------|-----------|-----------|
| C | 0.337026  | -0.569798 | -0.093038 |
| H | 0.020614  | -1.583335 | -0.358062 |
| C | -0.621250 | 0.341315  | 0.172149  |
| H | -0.330961 | 1.319636  | 0.566873  |
| C | 2.429046  | 0.831330  | -0.298896 |
| C | 1.783698  | -0.387085 | -0.006312 |
| C | 3.812631  | 0.945177  | -0.175093 |
| C | 2.585869  | -1.479953 | 0.354134  |
| C | 4.572110  | -0.143281 | 0.226679  |
| H | 4.268459  | 1.904146  | -0.413292 |
| C | 3.960817  | -1.369495 | 0.485021  |
| H | 2.093820  | -2.432565 | 0.554726  |
| H | 5.651462  | -0.037986 | 0.323065  |
| H | 4.553937  | -2.231602 | 0.782795  |
| O | 1.761558  | 1.928897  | -0.731789 |
| C | -2.062319 | 0.116421  | 0.084559  |
| C | -2.929121 | 1.005407  | 0.733842  |
| C | -2.623898 | -0.952408 | -0.628615 |
| C | -4.305262 | 0.821419  | 0.697494  |
| H | -2.506322 | 1.847330  | 1.283386  |
| C | -3.998415 | -1.137549 | -0.664827 |
| H | -1.975688 | -1.634523 | -1.178275 |
| C | -4.846307 | -0.253960 | 0.000098  |
| H | -4.958372 | 1.522197  | 1.215049  |
| H | -4.414435 | -1.972844 | -1.226085 |
| H | -5.924593 | -0.398949 | -0.034785 |
| H | 0.861875  | 1.662090  | -0.984251 |

## I'

E = -1322.6118509au

|   |           |           |           |
|---|-----------|-----------|-----------|
| N | 2.908141  | -0.544081 | -0.994635 |
| C | -0.451753 | -2.624462 | 0.085308  |
| C | 0.482860  | -2.389894 | 1.185424  |
| C | -0.154001 | -1.626580 | 2.183246  |

|    |           |           |           |
|----|-----------|-----------|-----------|
| C  | -1.437090 | -1.236499 | 1.638694  |
| C  | -1.646788 | -1.956098 | 0.385239  |
| Rh | -0.029284 | -0.342808 | 0.306861  |
| C  | -0.014797 | 1.753445  | 0.596496  |
| H  | -0.576016 | 2.113437  | 1.464385  |
| C  | -0.733293 | 1.429140  | -0.608144 |
| H  | -0.177881 | 1.534444  | -1.548565 |
| C  | 0.374686  | -1.242139 | 3.522879  |
| H  | 0.105336  | -0.209181 | 3.781101  |
| H  | -0.019871 | -1.891680 | 4.320054  |
| H  | 1.469222  | -1.308461 | 3.560690  |
| C  | -2.494677 | -0.515523 | 2.401305  |
| H  | -3.072533 | -1.217578 | 3.022395  |
| H  | -2.059930 | 0.236138  | 3.074038  |
| H  | -3.200937 | -0.001829 | 1.737601  |
| C  | -2.909676 | -1.951401 | -0.401062 |
| H  | -3.612841 | -2.713163 | -0.030618 |
| H  | -3.417928 | -0.980145 | -0.344836 |
| H  | -2.726900 | -2.155994 | -1.464135 |
| C  | -0.180019 | -3.500583 | -1.091846 |
| H  | -0.326221 | -4.563099 | -0.841548 |
| H  | -0.852263 | -3.268947 | -1.928160 |
| H  | 0.850229  | -3.404485 | -1.461873 |
| C  | 1.846834  | -2.991265 | 1.262200  |
| H  | 1.809968  | -4.003758 | 1.692202  |
| H  | 2.310902  | -3.094684 | 0.270713  |
| H  | 2.517394  | -2.398465 | 1.900025  |
| C  | 2.343950  | 1.603380  | -0.219778 |
| C  | 1.361090  | 2.282288  | 0.511253  |
| C  | 3.636413  | 2.066451  | -0.377828 |
| C  | 1.759834  | 3.468828  | 1.131568  |
| C  | 3.992660  | 3.261688  | 0.245397  |
| H  | 4.353865  | 1.488640  | -0.955002 |
| C  | 3.057828  | 3.955371  | 1.005484  |
| H  | 1.022891  | 4.018918  | 1.717139  |
| H  | 5.007514  | 3.639874  | 0.139374  |
| H  | 3.337784  | 4.882874  | 1.501765  |
| C  | 1.765092  | -0.821292 | -3.146429 |
| H  | 0.733451  | -0.747797 | -2.767859 |
| H  | 2.074458  | 0.192074  | -3.427582 |
| H  | 1.794777  | -1.487826 | -4.011783 |
| C  | -2.185066 | 1.548636  | -0.794792 |
| C  | -2.747339 | 1.116635  | -2.006604 |
| C  | -3.052950 | 2.074483  | 0.171914  |



|   |           |           |           |
|---|-----------|-----------|-----------|
| C | -4.112939 | 1.192928  | -2.240506 |
| H | -2.082566 | 0.697400  | -2.765627 |
| C | -4.423685 | 2.144040  | -0.056696 |
| H | -2.647150 | 2.448551  | 1.112307  |
| C | -4.963654 | 1.703567  | -1.261722 |
| H | -4.518366 | 0.847357  | -3.190848 |
| H | -5.075438 | 2.559402  | 0.711354  |
| H | -6.035837 | 1.764529  | -1.440036 |
| O | 1.898172  | 0.392053  | -0.768981 |
| C | 2.643377  | -1.388435 | -2.074422 |
| O | 3.143340  | -2.495660 | -2.083942 |
| H | 3.102212  | -1.053035 | -0.129030 |

### TS<sub>r,J'</sub>

E = -1322.5618786au

|    |           |           |           |
|----|-----------|-----------|-----------|
| N  | -1.591558 | -0.305721 | 1.790682  |
| C  | 0.532866  | -2.602938 | -0.196820 |
| C  | -0.383016 | -2.411460 | -1.313989 |
| C  | 0.235377  | -1.585058 | -2.276305 |
| C  | 1.490156  | -1.147604 | -1.707361 |
| C  | 1.705291  | -1.859678 | -0.458502 |
| Rh | 0.014745  | -0.399816 | -0.326787 |
| C  | -0.020431 | 1.732177  | -0.603871 |
| H  | 0.580893  | 2.121772  | -1.431473 |
| C  | 0.650490  | 1.391717  | 0.617509  |
| H  | 0.070850  | 1.481366  | 1.540404  |
| C  | -0.301936 | -1.154957 | -3.597866 |
| H  | -0.148109 | -0.079924 | -3.765273 |
| H  | 0.186628  | -1.686749 | -4.429020 |
| H  | -1.379009 | -1.344283 | -3.674725 |
| C  | 2.517641  | -0.352636 | -2.434244 |
| H  | 3.142794  | -1.011762 | -3.056125 |
| H  | 2.057208  | 0.386577  | -3.103276 |
| H  | 3.182973  | 0.181037  | -1.745366 |
| C  | 2.948336  | -1.829256 | 0.357718  |
| H  | 3.667301  | -2.588138 | 0.012459  |
| H  | 3.446491  | -0.852709 | 0.305452  |
| H  | 2.737119  | -2.028971 | 1.416534  |
| C  | 0.280062  | -3.464186 | 0.991530  |
| H  | 0.757578  | -4.450368 | 0.881830  |
| H  | 0.680400  | -3.006248 | 1.907172  |
| H  | -0.792748 | -3.622106 | 1.146607  |
| C  | -1.742834 | -3.009745 | -1.390016 |
| H  | -1.689413 | -4.094142 | -1.568409 |

|   |           |           |           |
|---|-----------|-----------|-----------|
| H | -2.286660 | -2.848327 | -0.450004 |
| H | -2.332687 | -2.563830 | -2.199273 |
| C | -2.447615 | 1.377526  | -0.055300 |
| C | -1.414382 | 2.171967  | -0.618701 |
| C | -3.746223 | 1.895529  | 0.114766  |
| C | -1.787730 | 3.402742  | -1.179063 |
| C | -4.063254 | 3.139063  | -0.394940 |
| H | -4.493864 | 1.255414  | 0.581377  |
| C | -3.081767 | 3.884765  | -1.063136 |
| H | -1.021571 | 4.007819  | -1.664819 |
| H | -5.075222 | 3.528553  | -0.300148 |
| H | -3.330858 | 4.862131  | -1.473412 |
| C | -2.659049 | -1.108859 | 3.808750  |
| H | -1.922577 | -0.478154 | 4.319761  |
| H | -3.651137 | -0.653932 | 3.932522  |
| H | -2.680300 | -2.096044 | 4.280015  |
| C | 2.091684  | 1.555122  | 0.857366  |
| C | 2.619520  | 1.129170  | 2.086741  |
| C | 2.977659  | 2.128175  | -0.065343 |
| C | 3.970512  | 1.254467  | 2.377307  |
| H | 1.940855  | 0.675872  | 2.812655  |
| C | 4.333702  | 2.249138  | 0.221316  |
| H | 2.599377  | 2.500948  | -1.017505 |
| C | 4.840191  | 1.812150  | 1.441918  |
| H | 4.350034  | 0.911335  | 3.339113  |
| H | 4.999162  | 2.701432  | -0.513345 |
| H | 5.900769  | 1.912598  | 1.665963  |
| O | -2.244258 | 0.082969  | 0.177450  |
| C | -2.381300 | -1.292444 | 2.326492  |
| O | -2.791489 | -2.261153 | 1.711155  |
| H | -1.716596 | 0.606741  | 2.236363  |

### J'

E = -1322.6754167au

|    |           |           |           |
|----|-----------|-----------|-----------|
| N  | 0.396722  | -1.244835 | 1.792109  |
| C  | 0.640543  | -2.335613 | -1.141867 |
| C  | -0.706474 | -2.139609 | -1.567718 |
| C  | -0.801706 | -0.834818 | -2.175490 |
| C  | 0.517267  | -0.266518 | -2.183294 |
| C  | 1.407817  | -1.168731 | -1.510007 |
| Rh | -0.180306 | -0.549653 | -0.091782 |
| C  | -0.891605 | 1.627276  | 0.015789  |
| H  | -0.695024 | 2.129416  | -0.938830 |
| C  | 0.195526  | 1.481092  | 0.872533  |

|   |           |           |           |
|---|-----------|-----------|-----------|
| H | 0.005713  | 1.192941  | 1.907794  |
| C | -2.050022 | -0.260501 | -2.751510 |
| H | -1.975781 | 0.825100  | -2.884509 |
| H | -2.278422 | -0.704470 | -3.731567 |
| H | -2.905361 | -0.446277 | -2.088596 |
| C | 0.942158  | 0.999343  | -2.839489 |
| H | 1.498559  | 0.766819  | -3.759095 |
| H | 0.089432  | 1.627591  | -3.122159 |
| H | 1.607576  | 1.591658  | -2.197148 |
| C | 2.879659  | -1.014648 | -1.360849 |
| H | 3.408602  | -1.655305 | -2.082564 |
| H | 3.192247  | 0.021389  | -1.537582 |
| H | 3.180230  | -1.293728 | -0.341743 |
| C | 1.185494  | -3.549461 | -0.479057 |
| H | 1.496297  | -4.286515 | -1.234186 |
| H | 2.053147  | -3.292604 | 0.138276  |
| H | 0.436550  | -4.022752 | 0.167665  |
| C | -1.862894 | -3.036489 | -1.317274 |
| H | -2.489055 | -3.131368 | -2.213995 |
| H | -1.542136 | -4.038768 | -1.013795 |
| H | -2.483846 | -2.610060 | -0.512062 |
| C | -2.790814 | 0.304566  | 0.913592  |
| C | -2.311264 | 1.525864  | 0.398038  |
| C | -4.112855 | 0.253541  | 1.394422  |
| C | -3.168417 | 2.619790  | 0.264854  |
| C | -4.939011 | 1.361132  | 1.283990  |
| H | -4.474075 | -0.685876 | 1.810628  |
| C | -4.482535 | 2.549580  | 0.708532  |
| H | -2.782867 | 3.545424  | -0.167739 |
| H | -5.967656 | 1.293139  | 1.637629  |
| H | -5.142519 | 3.409609  | 0.616572  |
| C | 1.458169  | -2.449303 | 3.612843  |
| H | 2.263150  | -2.078521 | 4.257138  |
| H | 0.497934  | -2.330107 | 4.128176  |
| H | 1.640844  | -3.520145 | 3.454111  |
| C | 1.524716  | 2.056485  | 0.573355  |
| C | 2.697817  | 1.450041  | 1.041816  |
| C | 1.632834  | 3.250000  | -0.153635 |
| C | 3.938297  | 2.009593  | 0.761730  |
| H | 2.642258  | 0.497582  | 1.569946  |
| C | 2.876762  | 3.806090  | -0.434569 |
| H | 0.729004  | 3.762702  | -0.484093 |
| C | 4.035413  | 3.183815  | 0.018495  |
| H | 4.838943  | 1.513185  | 1.119942  |

|   |           |           |           |
|---|-----------|-----------|-----------|
| H | 2.937305  | 4.735872  | -0.998523 |
| H | 5.010365  | 3.618235  | -0.197366 |
| O | -2.034116 | -0.773917 | 0.883202  |
| C | 1.538804  | -1.741965 | 2.268074  |
| O | 2.641857  | -1.684131 | 1.698664  |
| H | -0.438717 | -1.404868 | 2.348344  |

**TS<sub>D'</sub>-K'**

**E = -1322.5672522au**

|    |           |           |           |
|----|-----------|-----------|-----------|
| Rh | 0.053310  | -0.484740 | 0.108660  |
| C  | -0.185948 | -2.619027 | 0.949128  |
| C  | 1.091463  | -2.527181 | 0.379231  |
| C  | 1.810165  | -1.434601 | 1.038333  |
| C  | -0.285306 | -1.569451 | 1.961901  |
| C  | 0.984884  | -0.937136 | 2.097341  |
| C  | -4.492632 | 2.862275  | 0.224847  |
| C  | -4.977157 | 1.558161  | 0.166188  |
| C  | -4.112553 | 0.508829  | -0.101012 |
| C  | -2.735306 | 0.735533  | -0.287752 |
| C  | -2.240280 | 2.056767  | -0.256565 |
| C  | -3.137988 | 3.090634  | 0.006708  |
| H  | -5.163028 | 3.695108  | 0.428852  |
| H  | -6.035584 | 1.355505  | 0.326221  |
| H  | -4.464039 | -0.520598 | -0.155999 |
| H  | -2.754445 | 4.112137  | 0.031608  |
| O  | -1.993521 | -0.354371 | -0.464238 |
| N  | -0.394609 | -0.286221 | -1.809101 |
| C  | -0.424972 | -1.420292 | -2.547260 |
| C  | 0.557957  | -1.230348 | -3.709133 |
| H  | 1.308740  | -0.451043 | -3.534638 |
| H  | 1.054374  | -2.194457 | -3.869048 |
| H  | -0.012348 | -0.972793 | -4.609051 |
| O  | -1.085842 | -2.439779 | -2.420689 |
| C  | 0.220377  | 1.629740  | 0.277822  |
| C  | -0.804360 | 2.360251  | -0.569812 |
| C  | 1.370219  | 0.047181  | 3.142458  |
| H  | 1.730982  | -0.470785 | 4.042974  |
| H  | 2.173916  | 0.709194  | 2.799818  |
| H  | 0.522479  | 0.674793  | 3.447589  |
| C  | -1.501071 | -1.295148 | 2.777097  |
| H  | -1.516325 | -1.908761 | 3.690026  |
| H  | -1.550761 | -0.240288 | 3.076246  |
| H  | -2.412073 | -1.516128 | 2.207752  |
| C  | -1.304602 | -3.525215 | 0.572437  |

|   |           |           |           |
|---|-----------|-----------|-----------|
| H | -1.602130 | -4.155134 | 1.423537  |
| H | -2.179825 | -2.944957 | 0.250793  |
| H | -1.033840 | -4.174260 | -0.265789 |
| C | 1.632801  | -3.358917 | -0.729845 |
| H | 2.122371  | -4.263997 | -0.342328 |
| H | 0.836105  | -3.668492 | -1.417320 |
| H | 2.383497  | -2.808125 | -1.311806 |
| C | 3.227211  | -1.057500 | 0.778059  |
| H | 3.919645  | -1.712114 | 1.328523  |
| H | 3.472460  | -1.134323 | -0.288750 |
| H | 3.429005  | -0.020563 | 1.075850  |
| H | -0.608495 | 2.168950  | -1.634028 |
| H | -0.644494 | 3.443248  | -0.423056 |
| H | 0.004836  | 1.809021  | 1.344625  |
| C | 1.626284  | 1.997222  | -0.035884 |
| C | 2.447546  | 2.574357  | 0.944188  |
| C | 2.172449  | 1.824746  | -1.317902 |
| C | 3.763851  | 2.934577  | 0.667869  |
| H | 2.030526  | 2.768447  | 1.933578  |
| C | 3.482274  | 2.187737  | -1.597851 |
| H | 1.549940  | 1.376222  | -2.092590 |
| C | 4.291388  | 2.736290  | -0.603231 |
| H | 4.375384  | 3.384241  | 1.449338  |
| H | 3.880241  | 2.039098  | -2.601106 |
| H | 5.320939  | 3.014019  | -0.822576 |

### K'

$$E = -1322.5933161\text{au}$$

|    |           |           |           |
|----|-----------|-----------|-----------|
| Rh | 0.074741  | -0.576078 | -0.073541 |
| C  | -1.967708 | -1.506900 | -0.329915 |
| C  | -1.523707 | -1.147509 | -1.653351 |
| C  | -0.342684 | -1.881626 | -1.934211 |
| C  | -1.083585 | -2.526130 | 0.169702  |
| C  | -0.053872 | -2.724886 | -0.803983 |
| C  | 4.812062  | 2.452794  | 0.245078  |
| C  | 5.163770  | 1.198286  | -0.250418 |
| C  | 4.179269  | 0.290335  | -0.601752 |
| C  | 2.811507  | 0.610320  | -0.485260 |
| C  | 2.453193  | 1.878952  | 0.009287  |
| C  | 3.466483  | 2.770812  | 0.365694  |
| H  | 5.576198  | 3.173339  | 0.530871  |
| H  | 6.212697  | 0.922853  | -0.357272 |
| H  | 4.431697  | -0.696900 | -0.987419 |
| H  | 3.175751  | 3.751245  | 0.749680  |

|   |           |           |           |
|---|-----------|-----------|-----------|
| O | 1.941564  | -0.309944 | -0.886322 |
| N | 0.472769  | -0.082786 | 1.676071  |
| C | 0.026889  | -0.725785 | 2.780499  |
| C | 1.066297  | -1.587812 | 3.461528  |
| H | 1.639514  | -0.975244 | 4.167947  |
| H | 0.556824  | -2.378222 | 4.024707  |
| H | 1.773958  | -2.019382 | 2.742458  |
| O | -1.102573 | -0.549967 | 3.247253  |
| C | -0.058365 | 1.542759  | -0.528664 |
| C | -1.420073 | 2.061760  | -0.241732 |
| C | -2.136687 | 2.704320  | -1.261387 |
| C | -1.995063 | 2.009753  | 1.036702  |
| C | -3.387349 | 3.264437  | -1.022375 |
| H | -1.694102 | 2.774988  | -2.256440 |
| C | -3.243176 | 2.571518  | 1.276211  |
| H | -1.482299 | 1.477478  | 1.839293  |
| C | -3.947761 | 3.195528  | 0.249318  |
| H | -3.920922 | 3.761116  | -1.831714 |
| H | -3.675106 | 2.505594  | 2.273689  |
| H | -4.929220 | 3.627333  | 0.439184  |
| C | 1.025507  | 2.307769  | 0.194379  |
| C | 1.125518  | -3.628503 | -0.716558 |
| H | 1.047100  | -4.459534 | -1.432731 |
| H | 2.044361  | -3.072196 | -0.947315 |
| H | 1.235388  | -4.059951 | 0.285122  |
| C | -1.302717 | -3.285791 | 1.429305  |
| H | -2.127018 | -4.002301 | 1.298185  |
| H | -0.414543 | -3.858433 | 1.722073  |
| H | -1.577529 | -2.622173 | 2.261868  |
| C | -3.199640 | -1.051445 | 0.370180  |
| H | -3.986672 | -1.818271 | 0.306197  |
| H | -2.992159 | -0.862731 | 1.433075  |
| H | -3.595679 | -0.122798 | -0.056684 |
| C | -2.236256 | -0.266497 | -2.616611 |
| H | -2.838749 | -0.876979 | -3.305313 |
| H | -2.911051 | 0.435910  | -2.116386 |
| H | -1.537902 | 0.320124  | -3.227193 |
| C | 0.516565  | -1.776153 | -3.141870 |
| H | 0.793450  | -2.769841 | -3.518617 |
| H | 0.018683  | -1.233312 | -3.953368 |
| H | 1.446016  | -1.242995 | -2.882258 |
| H | 0.780287  | 2.346246  | 1.266284  |
| H | 0.937195  | 3.350382  | -0.166384 |
| H | 0.138681  | 1.505124  | -1.610911 |

**TS<sub>D1'</sub>-J**

E = -1322.4792399au

|    |           |           |           |
|----|-----------|-----------|-----------|
| N  | -1.683607 | -0.426693 | 1.105623  |
| C  | 0.097493  | -2.661021 | -0.693083 |
| C  | 0.374665  | -1.919769 | -1.871017 |
| C  | 1.580856  | -1.171028 | -1.612467 |
| C  | 2.141062  | -1.623175 | -0.353312 |
| C  | 1.214751  | -2.496048 | 0.235096  |
| Rh | 0.056897  | -0.506028 | -0.164068 |
| C  | -0.368368 | 1.574112  | -0.582753 |
| H  | 0.123010  | 1.899045  | -1.506235 |
| C  | 0.442190  | 1.472661  | 0.588986  |
| H  | -0.085314 | 1.516239  | 1.545432  |
| C  | -2.858974 | 1.251146  | -0.193921 |
| C  | -1.767110 | 2.075660  | -0.475242 |
| C  | -4.158447 | 1.711927  | -0.071199 |
| C  | -2.053265 | 3.432078  | -0.656240 |
| C  | -4.404472 | 3.069839  | -0.239887 |
| H  | -4.957440 | 1.002988  | 0.137442  |
| C  | -3.348057 | 3.926108  | -0.537933 |
| H  | -1.228644 | 4.109125  | -0.880635 |
| H  | -5.417661 | 3.455000  | -0.145338 |
| H  | -3.533022 | 4.990022  | -0.675898 |
| C  | 2.294264  | -0.326668 | -2.612940 |
| H  | 2.959427  | 0.398135  | -2.127170 |
| H  | 2.913179  | -0.945731 | -3.280799 |
| H  | 1.591946  | 0.232862  | -3.245282 |
| C  | 3.452266  | -1.183333 | 0.192862  |
| H  | 4.282842  | -1.695363 | -0.316550 |
| H  | 3.606234  | -0.103595 | 0.061817  |
| H  | 3.536164  | -1.393663 | 1.265834  |
| C  | -0.395749 | -1.912479 | -3.148749 |
| H  | -0.404948 | -0.915091 | -3.607145 |
| H  | 0.041403  | -2.606047 | -3.883836 |
| H  | -1.439995 | -2.213756 | -2.996031 |
| C  | -1.040136 | -3.596022 | -0.454065 |
| H  | -1.919334 | -3.333674 | -1.058968 |
| H  | -0.765305 | -4.631931 | -0.704629 |
| H  | -1.336455 | -3.586428 | 0.604206  |
| C  | 1.305262  | -3.189731 | 1.549812  |
| H  | 0.418690  | -2.979430 | 2.165800  |
| H  | 1.374187  | -4.280234 | 1.415941  |
| H  | 2.188543  | -2.868606 | 2.114090  |

|   |           |           |           |
|---|-----------|-----------|-----------|
| C | -3.658889 | -1.838252 | 1.670470  |
| H | -3.812013 | -2.334000 | 0.703639  |
| H | -3.918528 | -2.528763 | 2.477642  |
| H | -4.322975 | -0.966326 | 1.699714  |
| O | -2.646370 | -0.131675 | -0.099758 |
| C | -2.212633 | -1.445173 | 1.849275  |
| O | -1.492877 | -1.977249 | 2.689420  |
| C | 1.859903  | 1.849008  | 0.677307  |
| C | 2.531348  | 1.659937  | 1.895433  |
| C | 2.577013  | 2.425450  | -0.380377 |
| C | 3.861568  | 2.025060  | 2.049084  |
| H | 1.987142  | 1.205462  | 2.725036  |
| C | 3.912216  | 2.786566  | -0.229610 |
| H | 2.078074  | 2.615558  | -1.331049 |
| C | 4.562340  | 2.590432  | 0.985561  |
| H | 4.355936  | 1.869025  | 3.007092  |
| H | 4.443093  | 3.240895  | -1.065549 |
| H | 5.604506  | 2.881408  | 1.105139  |
| H | -1.670460 | -0.327321 | -0.763835 |

**L'**

E = -1551.5910204au

|    |           |           |           |
|----|-----------|-----------|-----------|
| Rh | -0.148692 | 0.306182  | -0.430032 |
| C  | 0.941860  | 1.070733  | -2.283501 |
| C  | 0.964995  | -0.384054 | -2.159036 |
| C  | -0.382975 | -0.860624 | -2.309899 |
| C  | -0.391129 | 1.480707  | -2.373421 |
| C  | -1.231123 | 0.280229  | -2.309321 |
| C  | 4.216027  | -2.830945 | 0.504658  |
| C  | 4.784867  | -1.634965 | 0.929756  |
| C  | 3.957993  | -0.621640 | 1.396120  |
| C  | 2.573015  | -0.788826 | 1.441988  |
| C  | 1.976705  | -1.981948 | 1.011828  |
| C  | 2.837132  | -2.985821 | 0.551109  |
| H  | 4.843229  | -3.643375 | 0.141454  |
| H  | 5.864207  | -1.494224 | 0.910478  |
| H  | 4.373806  | 0.311610  | 1.770925  |
| H  | 2.393641  | -3.927449 | 0.219217  |
| O  | 1.838337  | 0.223732  | 2.026295  |
| N  | 1.163257  | 1.065575  | 1.085532  |
| C  | 1.700100  | 2.323126  | 0.979539  |
| C  | 2.937482  | 2.687099  | 1.762832  |
| H  | 2.974838  | 3.776933  | 1.846320  |
| H  | 2.971721  | 2.223496  | 2.752656  |

|   |           |           |           |
|---|-----------|-----------|-----------|
| H | 3.826372  | 2.358391  | 1.206060  |
| O | 1.135507  | 3.157424  | 0.270392  |
| C | -0.512104 | -1.183495 | 1.086264  |
| C | -1.930896 | -1.616716 | 1.028414  |
| C | -2.904490 | -0.888613 | 1.735697  |
| C | -2.381755 | -2.742205 | 0.319918  |
| C | -4.252188 | -1.208622 | 1.672477  |
| H | -2.574821 | -0.066684 | 2.371855  |
| C | -3.733008 | -3.068551 | 0.252286  |
| H | -1.664496 | -3.390291 | -0.179926 |
| C | -4.681843 | -2.293760 | 0.911048  |
| H | -4.973914 | -0.617489 | 2.236444  |
| H | -4.043285 | -3.948604 | -0.310932 |
| H | -5.738679 | -2.549829 | 0.858820  |
| C | 0.502616  | -2.309943 | 1.046967  |
| C | -2.719469 | 0.278066  | -2.344701 |
| H | -3.098532 | 0.521608  | -3.348399 |
| H | -3.124363 | -0.698826 | -2.050456 |
| H | -3.119618 | 1.017266  | -1.639012 |
| C | -0.876411 | 2.887210  | -2.429098 |
| H | -0.714017 | 3.321764  | -3.426295 |
| H | -1.948621 | 2.948143  | -2.210935 |
| H | -0.346727 | 3.504314  | -1.691678 |
| C | 2.156677  | 1.927872  | -2.297052 |
| H | 2.599179  | 1.952560  | -3.304489 |
| H | 1.931242  | 2.950744  | -1.979198 |
| H | 2.922660  | 1.533491  | -1.614386 |
| C | 2.200017  | -1.206934 | -2.264930 |
| H | 2.532330  | -1.247079 | -3.314632 |
| H | 3.025749  | -0.792403 | -1.673861 |
| H | 2.040524  | -2.236342 | -1.926315 |
| C | -0.787672 | -2.271450 | -2.542536 |
| H | -0.727742 | -2.502667 | -3.616855 |
| H | -0.131251 | -2.982761 | -2.024004 |
| H | -1.817032 | -2.461950 | -2.219137 |
| C | -1.918454 | 2.195262  | 1.514085  |
| O | -1.836415 | 1.631860  | 0.426685  |
| O | -1.003325 | 2.112646  | 2.448847  |
| H | -0.210022 | 1.632735  | 2.052306  |
| C | -3.132023 | 2.974351  | 1.906992  |
| H | -2.900704 | 3.714115  | 2.677739  |
| H | -3.567519 | 3.453181  | 1.025904  |
| H | -3.874594 | 2.271054  | 2.308443  |
| H | -0.364750 | -0.599939 | 2.002241  |

|   |          |           |          |
|---|----------|-----------|----------|
| H | 0.309675 | -2.955841 | 0.175348 |
| H | 0.323338 | -2.971419 | 1.918365 |

**TS<sub>L</sub>-M'**

E = -1551.5443812au

|    |           |           |           |
|----|-----------|-----------|-----------|
| Rh | 0.156360  | -0.522584 | -0.367165 |
| C  | -0.400838 | -1.483366 | -2.403965 |
| C  | -0.244394 | -0.035937 | -2.455816 |
| C  | 1.139585  | 0.264959  | -2.227289 |
| C  | 0.812503  | -2.034799 | -1.968274 |
| C  | 1.770363  | -0.941540 | -1.804175 |
| C  | -3.712061 | 3.580274  | -0.387407 |
| C  | -4.563465 | 2.627402  | 0.166325  |
| C  | -4.012200 | 1.557929  | 0.846764  |
| C  | -2.627060 | 1.423319  | 0.991062  |
| C  | -1.744219 | 2.356837  | 0.433970  |
| C  | -2.342407 | 3.432484  | -0.242694 |
| H  | -4.112836 | 4.433847  | -0.930918 |
| H  | -5.643398 | 2.716892  | 0.068214  |
| H  | -4.638362 | 0.788763  | 1.294983  |
| H  | -1.679490 | 4.182894  | -0.677799 |
| O  | -2.281718 | 0.256524  | 1.628659  |
| N  | -1.689231 | -0.914499 | 0.284610  |
| C  | -2.134829 | -2.139201 | 0.704535  |
| C  | -3.120225 | -2.277928 | 1.832153  |
| H  | -2.671198 | -1.960020 | 2.779883  |
| H  | -4.011539 | -1.663673 | 1.666382  |
| H  | -3.402282 | -3.333649 | 1.886428  |
| O  | -1.738552 | -3.112276 | 0.062645  |
| C  | 0.609099  | 1.212757  | 0.860564  |
| C  | 2.073948  | 1.506958  | 0.899277  |
| C  | 2.962231  | 0.595241  | 1.501567  |
| C  | 2.635593  | 2.697612  | 0.408313  |
| C  | 4.324124  | 0.844233  | 1.580584  |
| H  | 2.568846  | -0.343505 | 1.885108  |
| C  | 4.003845  | 2.948696  | 0.483671  |
| H  | 2.001335  | 3.459857  | -0.040497 |
| C  | 4.860485  | 2.022536  | 1.064249  |
| H  | 4.975839  | 0.108758  | 2.051230  |
| H  | 4.396809  | 3.885515  | 0.089514  |
| H  | 5.929466  | 2.219680  | 1.126207  |
| C  | -0.233236 | 2.416987  | 0.500913  |
| C  | 3.203862  | -1.130485 | -1.452715 |
| H  | 3.774895  | -1.497544 | -2.319150 |

|   |           |           |           |
|---|-----------|-----------|-----------|
| H | 3.666008  | -0.197477 | -1.108177 |
| H | 3.315635  | -1.865891 | -0.644955 |
| C | 1.104248  | -3.453470 | -1.631480 |
| H | 1.953989  | -3.834761 | -2.216063 |
| H | 1.357339  | -3.544313 | -0.565628 |
| H | 0.237251  | -4.096345 | -1.811479 |
| C | -1.660925 | -2.183203 | -2.768512 |
| H | -1.800479 | -2.147782 | -3.859910 |
| H | -1.664512 | -3.225163 | -2.440399 |
| H | -2.530461 | -1.695096 | -2.311548 |
| C | -1.302559 | 0.905629  | -2.916689 |
| H | -1.446268 | 0.843054  | -4.006356 |
| H | -2.263810 | 0.677524  | -2.437290 |
| H | -1.059033 | 1.946083  | -2.667712 |
| C | 1.800716  | 1.567481  | -2.493335 |
| H | 2.073153  | 1.624890  | -3.557744 |
| H | 1.140733  | 2.419227  | -2.284239 |
| H | 2.714555  | 1.702001  | -1.905134 |
| C | 0.415955  | -1.594972 | 2.544852  |
| O | 0.836806  | -1.662378 | 1.344880  |
| O | -0.427573 | -0.793356 | 3.010863  |
| H | -1.416339 | 0.131270  | 2.154724  |
| C | 1.032401  | -2.610395 | 3.481378  |
| H | 2.124393  | -2.604025 | 3.381243  |
| H | 0.748367  | -2.407097 | 4.517446  |
| H | 0.689975  | -3.613712 | 3.199034  |
| H | 0.333083  | 0.809461  | 1.836721  |
| H | 0.086447  | 2.793988  | -0.483895 |
| H | 0.025378  | 3.239801  | 1.198589  |

**M'**

$E = -1551.5661 \text{ au}$

|    |           |           |           |
|----|-----------|-----------|-----------|
| Rh | -0.142232 | 0.646801  | -0.201166 |
| C  | -0.102310 | 2.531167  | -1.510537 |
| C  | -0.287542 | 1.379062  | -2.343615 |
| C  | -1.571947 | 0.794995  | -2.030749 |
| C  | -1.180261 | 2.565929  | -0.582534 |
| C  | -2.110934 | 1.493394  | -0.920835 |
| C  | 3.813660  | -1.870599 | -2.022721 |
| C  | 4.544756  | -2.127451 | -0.867012 |
| C  | 3.878599  | -2.400071 | 0.322291  |
| C  | 2.485236  | -2.412855 | 0.374380  |
| C  | 1.736050  | -2.181436 | -0.791207 |
| C  | 2.424402  | -1.910379 | -1.974173 |

|   |           |           |           |
|---|-----------|-----------|-----------|
| H | 4.321548  | -1.659682 | -2.962537 |
| H | 5.633528  | -2.117071 | -0.890600 |
| H | 4.420516  | -2.606680 | 1.244235  |
| H | 1.848055  | -1.735304 | -2.885637 |
| O | 1.866787  | -2.722868 | 1.549043  |
| N | 1.682121  | 0.946811  | 0.029281  |
| C | 2.330061  | 1.562383  | 1.040926  |
| C | 3.640783  | 0.926926  | 1.415965  |
| H | 3.484681  | 0.375063  | 2.351841  |
| H | 3.992791  | 0.226406  | 0.649758  |
| H | 4.383613  | 1.715085  | 1.584001  |
| O | 1.913384  | 2.609756  | 1.551229  |
| C | -0.551293 | -1.460244 | 0.183230  |
| C | -1.983906 | -1.786808 | 0.338766  |
| C | -2.667174 | -1.375815 | 1.497441  |
| C | -2.692691 | -2.568523 | -0.587974 |
| C | -3.999691 | -1.702077 | 1.703360  |
| H | -2.130288 | -0.775119 | 2.229958  |
| C | -4.030784 | -2.890861 | -0.384726 |
| H | -2.188445 | -2.949579 | -1.474966 |
| C | -4.694018 | -2.454170 | 0.757841  |
| H | -4.500166 | -1.372050 | 2.612744  |
| H | -4.553638 | -3.502451 | -1.118981 |
| H | -5.738783 | -2.713936 | 0.920103  |
| C | 0.238133  | -2.305114 | -0.797688 |
| C | -3.430824 | 1.300324  | -0.262782 |
| H | -4.089475 | 2.158373  | -0.461789 |
| H | -3.938191 | 0.394995  | -0.613576 |
| H | -3.318881 | 1.209424  | 0.826046  |
| C | -1.322587 | 3.543792  | 0.526963  |
| H | -1.444764 | 4.561721  | 0.129504  |
| H | -2.186536 | 3.311211  | 1.157507  |
| H | -0.422609 | 3.523946  | 1.159940  |
| C | 1.028523  | 3.494768  | -1.570051 |
| H | 0.752029  | 4.363981  | -2.185605 |
| H | 1.297283  | 3.848663  | -0.568069 |
| H | 1.920436  | 3.037965  | -2.012775 |
| C | 0.632815  | 0.964705  | -3.435929 |
| H | 0.611680  | 1.686831  | -4.265469 |
| H | 1.666984  | 0.904456  | -3.070354 |
| H | 0.362922  | -0.017661 | -3.841715 |
| C | -2.226125 | -0.272039 | -2.831101 |
| H | -2.607363 | 0.148876  | -3.773081 |
| H | -1.522840 | -1.072704 | -3.097965 |

|   |           |           |           |
|---|-----------|-----------|-----------|
| H | -3.066673 | -0.733815 | -2.302006 |
| C | 0.259928  | 0.490407  | 2.839602  |
| O | -0.491285 | 0.882510  | 1.869073  |
| O | 1.133052  | -0.384072 | 2.799173  |
| C | 0.001749  | 1.245497  | 4.123131  |
| H | 0.421467  | 0.707684  | 4.977978  |
| H | 0.494869  | 2.222695  | 4.034355  |
| H | -1.069204 | 1.424682  | 4.268163  |
| H | 1.645352  | -1.894293 | 2.034988  |
| H | -0.070311 | -1.429821 | 1.160320  |
| H | -0.123826 | -2.152023 | -1.828370 |
| H | -0.011309 | -3.355635 | -0.550184 |

### TS<sub>M'-K</sub>

E = -1551.5285197au

|    |           |           |           |
|----|-----------|-----------|-----------|
| Rh | 0.388103  | -0.584952 | -0.204242 |
| C  | 1.284223  | -2.340848 | -1.398533 |
| C  | 1.405256  | -1.100326 | -2.100803 |
| C  | 2.309337  | -0.244698 | -1.363615 |
| C  | 1.939238  | -2.172500 | -0.137670 |
| C  | 2.639631  | -0.900813 | -0.147535 |
| C  | -4.386236 | 2.700005  | -1.388164 |
| C  | -5.148266 | 2.367921  | -0.269271 |
| C  | -4.596219 | 1.604561  | 0.743781  |
| C  | -3.271522 | 1.153610  | 0.681509  |
| C  | -2.478118 | 1.527457  | -0.422348 |
| C  | -3.071327 | 2.269415  | -1.452492 |
| H  | -4.809599 | 3.290618  | -2.197700 |
| H  | -6.183652 | 2.696048  | -0.192604 |
| H  | -5.175011 | 1.313472  | 1.618267  |
| H  | -2.461193 | 2.535579  | -2.317355 |
| O  | -2.858923 | 0.414569  | 1.720402  |
| N  | -1.491648 | -1.558400 | -0.929317 |
| C  | -1.756587 | -2.697967 | -0.296156 |
| C  | -3.101207 | -3.208264 | -0.856385 |
| H  | -3.765294 | -3.378037 | -0.000859 |
| H  | -3.582658 | -2.528367 | -1.564603 |
| H  | -2.906795 | -4.173539 | -1.341329 |
| O  | -1.151095 | -3.404325 | 0.514714  |
| C  | -0.025052 | 1.460213  | 0.456936  |
| C  | 1.026442  | 2.475036  | 0.359313  |
| C  | 1.992911  | 2.531093  | 1.378625  |
| C  | 1.060712  | 3.442080  | -0.653626 |
| C  | 2.984029  | 3.500821  | 1.357471  |

|   |           |           |           |
|---|-----------|-----------|-----------|
| H | 1.952650  | 1.780445  | 2.171511  |
| C | 2.050064  | 4.420021  | -0.665700 |
| H | 0.283645  | 3.456247  | -1.418324 |
| C | 3.019409  | 4.446911  | 0.331346  |
| H | 3.730019  | 3.528417  | 2.150249  |
| H | 2.055146  | 5.172217  | -1.452909 |
| H | 3.792024  | 5.213786  | 0.321408  |
| C | -1.009887 | 1.217954  | -0.589595 |
| C | 3.626373  | -0.462928 | 0.872783  |
| H | 4.563995  | -1.026903 | 0.757109  |
| H | 3.864014  | 0.603213  | 0.777401  |
| H | 3.236166  | -0.633755 | 1.881598  |
| C | 2.009736  | -3.195342 | 0.937662  |
| H | 2.743584  | -3.972646 | 0.676584  |
| H | 2.301586  | -2.745093 | 1.892544  |
| H | 1.023227  | -3.661002 | 1.059793  |
| C | 0.668565  | -3.579886 | -1.933530 |
| H | 1.408230  | -4.116932 | -2.547383 |
| H | 0.330609  | -4.237834 | -1.128080 |
| H | -0.194683 | -3.351124 | -2.570292 |
| C | 0.804046  | -0.819719 | -3.432618 |
| H | 1.326467  | -1.373560 | -4.226309 |
| H | -0.250271 | -1.126628 | -3.445640 |
| H | 0.852498  | 0.246524  | -3.684585 |
| C | 2.881712  | 1.027134  | -1.874322 |
| H | 3.674676  | 0.807647  | -2.604638 |
| H | 2.133779  | 1.646549  | -2.384406 |
| H | 3.319485  | 1.632436  | -1.073599 |
| C | 0.102166  | -0.951624 | 2.770894  |
| O | -0.560636 | -0.899520 | 1.651973  |
| O | 1.281839  | -0.645408 | 2.912492  |
| C | -0.745712 | -1.466220 | 3.909686  |
| H | -1.055718 | -2.492111 | 3.673459  |
| H | -0.183265 | -1.448075 | 4.847060  |
| H | -1.660591 | -0.869322 | 4.009032  |
| H | -2.051373 | -0.133900 | 1.558741  |
| H | -0.371654 | 1.307863  | 1.478980  |
| H | -0.677713 | 1.569019  | -1.573669 |
| H | -1.257198 | -0.040707 | -0.755828 |

### TS<sub>C1'-D2'</sub>

E = -1322.5767759au

|   |           |          |           |
|---|-----------|----------|-----------|
| N | 1.490794  | 1.460565 | -0.776300 |
| C | -0.190895 | 2.384538 | 0.470386  |

|    |           |           |           |
|----|-----------|-----------|-----------|
| C  | -0.570403 | 3.370261  | 1.379048  |
| H  | -0.042689 | 4.322208  | 1.369038  |
| C  | -1.584674 | 3.106530  | 2.291158  |
| H  | -1.880320 | 3.877139  | 3.001393  |
| C  | -2.209912 | 1.859567  | 2.308789  |
| H  | -3.001150 | 1.650415  | 3.026636  |
| C  | -1.835968 | 0.889916  | 1.385225  |
| H  | -2.365356 | -0.063600 | 1.370231  |
| C  | -0.827344 | 1.124827  | 0.443104  |
| C  | 2.135589  | -1.987748 | -0.073291 |
| C  | 2.522864  | -1.001866 | 0.913444  |
| C  | 1.525296  | -0.943931 | 1.933084  |
| C  | 0.489546  | -1.862396 | 1.555465  |
| C  | 0.879024  | -2.525630 | 0.340445  |
| Rh | 0.667909  | -0.342794 | -0.095627 |
| C  | -1.238023 | 0.469813  | -1.336930 |
| C  | -0.233100 | -0.366001 | -1.970585 |
| C  | 0.156747  | -3.651424 | -0.318011 |
| H  | 0.645071  | -4.611358 | -0.094634 |
| H  | -0.880759 | -3.730111 | 0.030311  |
| H  | 0.140858  | -3.546646 | -1.411143 |
| C  | 2.949112  | -2.405813 | -1.249345 |
| H  | 3.810714  | -3.018115 | -0.942428 |
| H  | 2.350389  | -3.002663 | -1.949057 |
| H  | 3.316978  | -1.524953 | -1.790903 |
| C  | 3.785753  | -0.218176 | 0.857145  |
| H  | 4.609539  | -0.796940 | 1.300669  |
| H  | 4.043716  | 0.019316  | -0.181732 |
| H  | 3.702735  | 0.725793  | 1.408404  |
| C  | 1.506286  | -0.040215 | 3.119165  |
| H  | 0.517990  | 0.421916  | 3.257763  |
| H  | 1.759539  | -0.571327 | 4.048567  |
| H  | 2.227196  | 0.777739  | 2.998599  |
| C  | -0.729745 | -2.172398 | 2.354464  |
| H  | -0.566153 | -3.067803 | 2.972539  |
| H  | -0.988584 | -1.348309 | 3.029254  |
| H  | -1.603408 | -2.369758 | 1.717780  |
| C  | 2.698576  | 3.101730  | -2.142356 |
| H  | 3.510949  | 3.090485  | -2.873780 |
| H  | 1.805020  | 3.557183  | -2.586307 |
| H  | 2.977555  | 3.724500  | -1.284128 |
| H  | 0.431318  | 0.097061  | -2.698973 |
| H  | -1.220839 | 1.501297  | -1.701577 |
| O  | 0.808140  | 2.664662  | -0.386585 |

|   |           |           |           |
|---|-----------|-----------|-----------|
| C | 2.430111  | 1.674986  | -1.719197 |
| O | 3.068434  | 0.727452  | -2.196624 |
| H | -0.519955 | -1.388070 | -2.230284 |
| C | -2.625614 | -0.052245 | -1.192108 |
| C | -3.696379 | 0.843092  | -1.242048 |
| C | -2.897020 | -1.407398 | -0.992479 |
| C | -5.005552 | 0.397535  | -1.106410 |
| H | -3.490410 | 1.906574  | -1.373595 |
| C | -4.204601 | -1.855494 | -0.844353 |
| H | -2.074079 | -2.120508 | -0.944472 |
| C | -5.264198 | -0.954570 | -0.902557 |
| H | -5.826896 | 1.110569  | -1.154926 |
| H | -4.397524 | -2.915808 | -0.687042 |
| H | -6.288355 | -1.306317 | -0.790724 |

## D2'

E = -1322.6051014au

|    |           |           |           |
|----|-----------|-----------|-----------|
| Rh | 0.917811  | 0.303421  | -0.300440 |
| C  | 2.796990  | 0.211802  | 1.102488  |
| C  | 2.410488  | -1.081886 | 0.547537  |
| C  | 2.551598  | -1.052356 | -0.867033 |
| C  | 3.044187  | 1.069089  | 0.033083  |
| C  | 2.824769  | 0.311717  | -1.211141 |
| C  | -5.181660 | 0.242053  | -0.139487 |
| C  | -5.036892 | 1.621430  | -0.022254 |
| C  | -3.786482 | 2.188702  | -0.211084 |
| C  | -2.676817 | 1.397294  | -0.520208 |
| C  | -2.808325 | 0.015172  | -0.692509 |
| C  | -4.080663 | -0.530523 | -0.475470 |
| H  | -6.151976 | -0.228028 | 0.011268  |
| H  | -5.891170 | 2.251603  | 0.219282  |
| H  | -3.640617 | 3.264838  | -0.139466 |
| H  | -4.199016 | -1.608889 | -0.598473 |
| O  | -1.502599 | 2.084689  | -0.745669 |
| N  | -0.442141 | 1.720269  | 0.128709  |
| C  | -0.184020 | 2.709782  | 1.054138  |
| C  | -1.097945 | 3.907889  | 1.118193  |
| H  | -1.225815 | 4.379835  | 0.138102  |
| H  | -2.093478 | 3.608073  | 1.469282  |
| H  | -0.670918 | 4.618788  | 1.830897  |
| O  | 0.761222  | 2.594965  | 1.828465  |
| C  | -0.439488 | -0.346277 | -1.725593 |
| C  | -1.740312 | -0.943831 | -1.185737 |
| C  | 3.044965  | 0.846485  | -2.581290 |



|   |           |           |           |   |           |           |           |
|---|-----------|-----------|-----------|---|-----------|-----------|-----------|
| H | 4.110353  | 0.805312  | -2.855275 | C | 3.987013  | 0.083175  | -1.727335 |
| H | 2.483325  | 0.274392  | -3.329786 | C | 2.751231  | -0.185400 | -1.147173 |
| H | 2.723477  | 1.892278  | -2.656511 | C | 1.864244  | 0.826460  | -0.767760 |
| C | 3.393998  | 2.512740  | 0.084478  | C | 2.232349  | 2.138873  | -1.051295 |
| H | 4.476328  | 2.664732  | -0.040232 | H | 3.736833  | 3.473067  | -1.837689 |
| H | 2.890305  | 3.065567  | -0.719658 | H | 5.310547  | 1.630831  | -2.410901 |
| H | 3.075218  | 2.962324  | 1.030101  | H | 4.641906  | -0.741844 | -2.003928 |
| C | 2.832083  | 0.507004  | 2.559619  | H | 1.547311  | 2.954752  | -0.806900 |
| H | 3.565646  | -0.134793 | 3.070214  | O | 2.406171  | -1.502353 | -0.982678 |
| H | 3.088743  | 1.551569  | 2.755367  | N | 1.031410  | -1.616475 | -0.647368 |
| H | 1.851251  | 0.334094  | 3.021825  | C | 0.681062  | -2.906407 | -0.344565 |
| C | 2.092974  | -2.270118 | 1.378822  | C | 1.770970  | -3.945448 | -0.319961 |
| H | 3.024234  | -2.724035 | 1.753045  | H | 2.235610  | -4.048746 | -1.307982 |
| H | 1.490430  | -1.992502 | 2.252487  | H | 2.571267  | -3.662716 | 0.374349  |
| H | 1.541755  | -3.037202 | 0.821835  | H | 1.326685  | -4.897538 | -0.018181 |
| C | 2.409440  | -2.212212 | -1.790079 | O | -0.498523 | -3.183300 | -0.130202 |
| H | 3.345098  | -2.786950 | -1.848416 | C | -0.140773 | -0.884755 | -2.135909 |
| H | 1.617076  | -2.894643 | -1.453617 | C | -0.845578 | 0.275504  | -1.766254 |
| H | 2.157266  | -1.894561 | -2.809283 | C | -2.805611 | 1.258180  | 1.514210  |
| H | -2.216895 | -1.443585 | -2.053460 | H | -3.195505 | 1.789514  | 2.395830  |
| H | -0.651096 | 0.512551  | -2.378732 | H | -2.882113 | 1.941682  | 0.659697  |
| H | 0.064219  | -1.125913 | -2.317685 | H | -3.465435 | 0.408748  | 1.307826  |
| C | -1.466709 | -2.062405 | -0.193535 | C | -1.754118 | -1.647388 | 2.429494  |
| C | -1.151559 | -3.336682 | -0.671575 | H | -2.812649 | -1.476098 | 2.201235  |
| C | -1.515849 | -1.865522 | 1.188757  | H | -1.416163 | -2.485738 | 1.804277  |
| C | -0.895042 | -4.390508 | 0.201766  | H | -1.687834 | -1.955598 | 3.483334  |
| H | -1.124382 | -3.504663 | -1.750744 | C | 1.369411  | -1.440160 | 2.804996  |
| C | -1.272599 | -2.918462 | 2.065323  | H | 1.489957  | -1.453054 | 3.898387  |
| H | -1.766294 | -0.877616 | 1.577266  | H | 0.947065  | -2.409579 | 2.509547  |
| C | -0.962272 | -4.185142 | 1.577102  | H | 2.369932  | -1.357309 | 2.359057  |
| H | -0.664560 | -5.378981 | -0.194205 | C | 2.248343  | 1.595512  | 2.362792  |
| H | -1.332287 | -2.748669 | 3.139948  | H | 2.322280  | 2.019364  | 3.375087  |
| H | -0.780842 | -5.009388 | 2.265235  | H | 3.027995  | 0.829792  | 2.263954  |

### **TS<sub>C1'-D3'</sub>**

$$E = -1322.5752818\text{au}$$

|    |           |           |           |   |           |           |           |
|----|-----------|-----------|-----------|---|-----------|-----------|-----------|
| Rh | 0.220467  | 0.149601  | 0.231456  | C | -0.371726 | 3.195208  | 1.362078  |
| C  | 0.891043  | 1.028461  | 2.130775  | H | -0.850659 | 3.738534  | 2.191212  |
| C  | -0.269559 | 1.736692  | 1.654544  | H | 0.615938  | 3.644549  | 1.203491  |
| C  | -1.401901 | 0.840939  | 1.758431  | H | -0.971176 | 3.382612  | 0.459709  |
| C  | 0.488789  | -0.321132 | 2.367956  | H | 0.754976  | -0.793006 | -2.747609 |
| C  | -0.944603 | -0.422324 | 2.178710  | H | -0.450136 | 1.220449  | -2.149677 |
| C  | 3.466919  | 2.437325  | -1.635255 | H | -0.677628 | -1.830634 | -2.211569 |
| C  | 4.345547  | 1.408347  | -1.958169 | C | -2.305865 | 0.235593  | -1.578587 |
|    |           |           |           | C | -3.062029 | 1.372616  | -1.892468 |
|    |           |           |           | C | -2.984893 | -0.912150 | -1.136912 |

|   |           |           |           |
|---|-----------|-----------|-----------|
| C | -4.449084 | 1.366274  | -1.788531 |
| H | -2.545809 | 2.269180  | -2.241948 |
| C | -4.370274 | -0.915046 | -1.036154 |
| H | -2.417552 | -1.799864 | -0.848626 |
| C | -5.111994 | 0.220246  | -1.361296 |
| H | -5.014161 | 2.260621  | -2.048631 |
| H | -4.878180 | -1.817150 | -0.695961 |
| H | -6.197699 | 0.209523  | -1.281529 |

### D3'

E = -1322.605818au

|    |           |           |           |
|----|-----------|-----------|-----------|
| Rh | -0.255074 | 0.221087  | 0.203722  |
| C  | -0.927893 | 1.723124  | 1.771595  |
| C  | 0.208174  | 0.922079  | 2.189752  |
| C  | 1.354998  | 1.344069  | 1.414355  |
| C  | -0.515771 | 2.479530  | 0.658620  |
| C  | 0.901484  | 2.236928  | 0.427665  |
| C  | -3.510050 | -2.418577 | 1.546148  |
| C  | -4.224260 | -2.585188 | 0.364065  |
| C  | -3.749259 | -2.017628 | -0.814183 |
| C  | -2.582055 | -1.267461 | -0.764250 |
| C  | -1.852852 | -1.036342 | 0.403265  |
| C  | -2.336162 | -1.662682 | 1.554400  |
| H  | -3.861327 | -2.883513 | 2.466725  |
| H  | -5.139347 | -3.174717 | 0.349231  |
| H  | -4.262239 | -2.156755 | -1.764821 |
| H  | -1.780656 | -1.567004 | 2.489648  |
| O  | -2.139647 | -0.749051 | -1.977417 |
| N  | -0.793905 | -0.338672 | -1.878986 |
| C  | -0.540003 | 0.751140  | -2.754993 |
| C  | -1.734508 | 1.585895  | -3.100235 |
| H  | -2.365775 | 1.052493  | -3.821247 |
| H  | -2.354419 | 1.782265  | -2.218945 |
| H  | -1.382941 | 2.520134  | -3.547632 |
| O  | 0.586985  | 0.969541  | -3.145109 |
| C  | 0.157289  | -1.497971 | -1.851555 |
| C  | 0.734037  | -1.568138 | -0.451542 |
| C  | 2.752283  | 0.935895  | 1.707862  |
| H  | 3.156212  | 1.550845  | 2.526804  |
| H  | 2.810148  | -0.112260 | 2.025774  |
| H  | 3.415992  | 1.045707  | 0.843153  |
| C  | 1.710877  | 2.908183  | -0.628589 |
| H  | 2.741665  | 2.534753  | -0.639599 |
| H  | 1.299093  | 2.735966  | -1.634178 |

|   |           |           |           |
|---|-----------|-----------|-----------|
| H | 1.751918  | 3.996400  | -0.470327 |
| C | -1.330097 | 3.458525  | -0.115179 |
| H | -1.244215 | 4.469028  | 0.312806  |
| H | -0.990123 | 3.526734  | -1.156978 |
| H | -2.396082 | 3.196232  | -0.123536 |
| C | -2.269424 | 1.732817  | 2.416853  |
| H | -2.260515 | 2.339132  | 3.334915  |
| H | -3.034072 | 2.149536  | 1.749791  |
| H | -2.597954 | 0.721629  | 2.689984  |
| C | 0.291785  | 0.071314  | 3.411549  |
| H | 0.794734  | 0.602337  | 4.234663  |
| H | -0.702584 | -0.219901 | 3.771101  |
| H | 0.861993  | -0.848187 | 3.215839  |
| H | -0.437407 | -2.376000 | -2.133838 |
| H | 0.330374  | -2.412538 | 0.118454  |
| H | 0.907806  | -1.317823 | -2.628940 |
| C | 2.207130  | -1.530721 | -0.350709 |
| C | 2.853275  | -2.300354 | 0.628845  |
| C | 3.011656  | -0.758989 | -1.207493 |
| C | 4.238673  | -2.311745 | 0.745817  |
| H | 2.244763  | -2.911921 | 1.298614  |
| C | 4.396302  | -0.776014 | -1.094360 |
| H | 2.541405  | -0.123290 | -1.959993 |
| C | 5.020542  | -1.550586 | -0.117995 |
| H | 4.710853  | -2.926879 | 1.511159  |
| H | 4.996618  | -0.173683 | -1.776020 |
| H | 6.106030  | -1.563485 | -0.035227 |

### TS<sub>Cl'</sub>-D4'

E = -1322.5722567au

|    |           |           |           |
|----|-----------|-----------|-----------|
| Rh | -0.716990 | -0.375921 | -0.161375 |
| C  | -2.426743 | -1.455402 | 0.813266  |
| C  | -2.246766 | -1.858846 | -0.561198 |
| C  | -0.991659 | -2.573426 | -0.644914 |
| C  | -1.244081 | -1.812670 | 1.515836  |
| C  | -0.369969 | -2.544559 | 0.620849  |
| C  | -3.393993 | 2.966427  | -1.137596 |
| C  | -2.762045 | 4.016417  | -0.481208 |
| C  | -1.563836 | 3.794318  | 0.190776  |
| C  | -1.030902 | 2.509269  | 0.208196  |
| C  | -1.654144 | 1.420046  | -0.408628 |
| C  | -2.832867 | 1.686764  | -1.104078 |
| H  | -4.322892 | 3.138245  | -1.680385 |
| H  | -3.190761 | 5.017224  | -0.500311 |

|   |           |           |           |
|---|-----------|-----------|-----------|
| H | -1.033817 | 4.601527  | 0.694736  |
| H | -3.334749 | 0.879780  | -1.642249 |
| O | 0.173742  | 2.352787  | 0.847255  |
| N | 0.669950  | 1.036612  | 0.686672  |
| C | 1.616745  | 0.752425  | 1.652774  |
| C | 2.023032  | 1.860817  | 2.587032  |
| H | 2.376951  | 2.735871  | 2.027809  |
| H | 1.172076  | 2.197211  | 3.190973  |
| H | 2.817847  | 1.482877  | 3.235409  |
| O | 2.123518  | -0.361062 | 1.699819  |
| C | 1.378165  | 0.970888  | -1.235093 |
| C | 0.393171  | 0.187032  | -1.916081 |
| C | -0.492176 | -3.236690 | -1.881843 |
| H | -0.923353 | -4.243690 | -1.986588 |
| H | -0.773122 | -2.671539 | -2.780143 |
| H | 0.599776  | -3.346079 | -1.883162 |
| C | 0.907790  | -3.199685 | 1.021239  |
| H | 1.391561  | -3.691673 | 0.167550  |
| H | 1.614197  | -2.470733 | 1.437567  |
| H | 0.728553  | -3.975172 | 1.781271  |
| C | -0.943355 | -1.557481 | 2.952199  |
| H | -1.244802 | -2.409600 | 3.580094  |
| H | 0.131673  | -1.400855 | 3.099597  |
| H | -1.467479 | -0.668318 | 3.324326  |
| C | -3.633634 | -0.783041 | 1.369696  |
| H | -4.447143 | -1.504361 | 1.537282  |
| H | -3.416856 | -0.298692 | 2.329326  |
| H | -4.008939 | -0.003333 | 0.693565  |
| C | -3.274618 | -1.817707 | -1.641342 |
| H | -3.712888 | -2.813004 | -1.813170 |
| H | -4.099127 | -1.141217 | -1.385316 |
| H | -2.849622 | -1.475520 | -2.595587 |
| H | 1.233480  | 2.054425  | -1.241625 |
| H | -0.283402 | 0.753814  | -2.559772 |
| H | 0.752018  | -0.740426 | -2.371071 |
| C | 2.765214  | 0.558029  | -1.042920 |
| C | 3.731923  | 1.540549  | -0.799211 |
| C | 3.155907  | -0.785578 | -1.067301 |
| C | 5.062979  | 1.194448  | -0.611818 |
| H | 3.425520  | 2.587409  | -0.763829 |
| C | 4.484250  | -1.133159 | -0.876296 |
| H | 2.401179  | -1.559278 | -1.202735 |
| C | 5.440504  | -0.144915 | -0.653528 |
| H | 5.807912  | 1.968265  | -0.435540 |

|   |          |           |           |
|---|----------|-----------|-----------|
| H | 4.776734 | -2.181523 | -0.888751 |
| H | 6.482973 | -0.420916 | -0.503533 |

### D4'

E = -1322.5890282au

|    |           |           |           |
|----|-----------|-----------|-----------|
| Rh | -0.776534 | -0.307261 | -0.195942 |
| C  | -2.747359 | -1.264097 | 0.497743  |
| C  | -2.418286 | -1.501937 | -0.897019 |
| C  | -1.266050 | -2.376926 | -0.935323 |
| C  | -1.735129 | -1.860880 | 1.271700  |
| C  | -0.818197 | -2.562759 | 0.386841  |
| C  | -2.825754 | 3.491834  | -1.036224 |
| C  | -2.061871 | 4.381919  | -0.288806 |
| C  | -0.937394 | 3.922628  | 0.390182  |
| C  | -0.626675 | 2.571064  | 0.321568  |
| C  | -1.381261 | 1.631389  | -0.386174 |
| C  | -2.477652 | 2.140605  | -1.086380 |
| H  | -3.694018 | 3.847837  | -1.589838 |
| H  | -2.325969 | 5.437177  | -0.245230 |
| H  | -0.300278 | 4.594646  | 0.963658  |
| H  | -3.081383 | 1.468074  | -1.698371 |
| O  | 0.521147  | 2.179740  | 1.002127  |
| N  | 0.907449  | 0.873188  | 0.637383  |
| C  | 1.381202  | 0.164473  | 1.778948  |
| C  | 0.960562  | 0.729607  | 3.104929  |
| H  | 1.436397  | 1.700049  | 3.285328  |
| H  | -0.123395 | 0.894128  | 3.136761  |
| H  | 1.262023  | 0.019812  | 3.880328  |
| O  | 2.024185  | -0.852442 | 1.651064  |
| C  | 1.613827  | 0.889172  | -0.741916 |
| C  | 0.640507  | 0.162379  | -1.647706 |
| C  | -0.688668 | -2.957829 | -2.179246 |
| H  | -1.227718 | -3.869523 | -2.477249 |
| H  | -0.754338 | -2.250746 | -3.016344 |
| H  | 0.368761  | -3.224977 | -2.055059 |
| C  | 0.325704  | -3.397136 | 0.849770  |
| H  | 0.900396  | -3.794315 | 0.004244  |
| H  | 1.021087  | -2.825792 | 1.479349  |
| H  | -0.026640 | -4.258104 | 1.438211  |
| C  | -1.602656 | -1.862059 | 2.756248  |
| H  | -2.020213 | -2.782469 | 3.191939  |
| H  | -0.546727 | -1.820437 | 3.058985  |
| H  | -2.121187 | -1.012889 | 3.218678  |
| C  | -3.926887 | -0.491548 | 0.978523  |

|   |           |           |           |
|---|-----------|-----------|-----------|
| H | -4.858361 | -1.064774 | 0.859478  |
| H | -3.832369 | -0.231444 | 2.039635  |
| H | -4.043873 | 0.451058  | 0.425462  |
| C | -3.291791 | -1.197651 | -2.067127 |
| H | -3.841783 | -2.093444 | -2.394647 |
| H | -4.037328 | -0.431001 | -1.823975 |
| H | -2.708930 | -0.834943 | -2.925232 |
| H | 1.603931  | 1.964843  | -0.959428 |
| H | 0.257811  | 0.798560  | -2.453747 |
| H | 1.034889  | -0.770959 | -2.066413 |
| C | 3.051885  | 0.452557  | -0.694334 |
| C | 4.028386  | 1.412591  | -0.425872 |
| C | 3.448995  | -0.867770 | -0.911971 |
| C | 5.376027  | 1.069457  | -0.383549 |
| H | 3.723172  | 2.446035  | -0.251308 |
| C | 4.792541  | -1.214178 | -0.875023 |
| H | 2.692215  | -1.634936 | -1.076345 |
| C | 5.760246  | -0.246374 | -0.613941 |
| H | 6.125536  | 1.832848  | -0.180750 |
| H | 5.088333  | -2.248457 | -1.043431 |
| H | 6.813693  | -0.520968 | -0.589519 |
